# Supplementary material for: Abscisic Acid Is a Major Regulator of Grape Berry Ripening Onset: New Insights into ABA Signaling Network
Source: Front Plant Sci. 2017 Jun 21;8:1093. doi: 10.3389/fpls.2017.01093 (PMC5479058; doi:10.3389/fpls.2017.01093)
Supplement: Supplementary file 5 [file Table_3.XLSX]

## Sheet: Foglio1
Supplementary Table 3.
List of the 1893 genes modulated by ABA. Line 2-382, genes modulated only at 20 hours, line 384-873, genes modulated at both 20 and 44 hours, line 875-1896, genes modulated only at 44 hours. Annotation and functional categorization according to Vitisnet. For R2R3-MYB, ERF, NAC, bZIP and WRKY TF gene families annotation is according to Wong et al 2016, Licausi et al, 2010, Wang et al 2013, Liu et …
	LogFC20	LogFC44	Functional.annotation	Gene Name,EC or Kegg-ID	Network1	Network2	Network3	Network4	Network5	Network6	Network7	Network8
VIT_12s0055g00160	1.09563		UDP-glycosyltransferase 71E1	E2_4_1_17	vv10040Pentose_glucuronate_interconversion	vv10500Starch_and_sucrose_metabolism
VIT_17s0000g08960	3.41865		Raffinose synthase	E2_4_1_82	vv10052Galactose_metabolism
VIT_17s0000g01290	1.26486		RGP1 (reversibly glycosylated polypeptide 1)	E2_4_1_186	vv10052Galactose_metabolism
VIT_16s0022g00160	2.14235		Apocytochrome b	K00412	vv10190Oxidative_phosphorylation	vv50135Primary_active_transporter_cat_D3_to_E2
VIT_03s0110g00200	1.83978		Apocytochrome b	K00412	vv10190Oxidative_phosphorylation	vv50135Primary_active_transporter_cat_D3_to_E2
VIT_00s0332g00060	1.99471		ATP synthase CF1 beta subunit	K02112	vv10190Oxidative_phosphorylation	vv10195Photosynthesis	vv50131Primary_active_transporter_cat_A2_to_A4
VIT_00s0438g00020	2.58394		ATPase subunit 9	K02128	vv10190Oxidative_phosphorylation	vv50131Primary_active_transporter_cat_A2_to_A4
VIT_00s0246g00230	1.62992		Cytochrome c oxidase subunit III	K02262	vv10190Oxidative_phosphorylation	vv50135Primary_active_transporter_cat_D3_to_E2
VIT_03s0110g00190	2.18064		Cytochrome oxidase subunit 1	K02256	vv10190Oxidative_phosphorylation	vv50135Primary_active_transporter_cat_D3_to_E2
VIT_12s0028g02450	2.45468		Cytochrome oxidase, subunit I	K02256	vv10190Oxidative_phosphorylation	vv50135Primary_active_transporter_cat_D3_to_E2
VIT_00s0733g00010	2.28653		F-type H+-transporting ATPase alpha chain	K02132	vv10190Oxidative_phosphorylation	vv50131Primary_active_transporter_cat_A2_to_A4
VIT_01s0146g00390	1.93659		F-type H+-transporting ATPase subunit 8	K02125	vv10190Oxidative_phosphorylation	vv50131Primary_active_transporter_cat_A2_to_A4
VIT_00s0246g00220	1.67673		F-type H+-transporting ATPase subunit 8	K02125	vv10190Oxidative_phosphorylation	vv50131Primary_active_transporter_cat_A2_to_A4
VIT_12s0055g00090	2.22032		F-type H+-transporting ATPase subunit c	K02128	vv10190Oxidative_phosphorylation	vv50131Primary_active_transporter_cat_A2_to_A4
VIT_00s0246g00090	1.38872		NADH dehydrogenase (ubiquinone) Fe-S protein 2	K03935	vv10190Oxidative_phosphorylation	vv50134Primary_active_transporter_cat_D1
VIT_13s0101g00200	1.54351		NADH dehydrogenase (ubiquinone) Fe-S protein 3	K03936	vv10190Oxidative_phosphorylation	vv50134Primary_active_transporter_cat_D1
VIT_00s0246g00050	1.71575		NADH dehydrogenase I subunit 2	K03879	vv10190Oxidative_phosphorylation	vv50134Primary_active_transporter_cat_D1
VIT_00s0396g00020	2.50926		NADH dehydrogenase subunit 1	K03878	vv10190Oxidative_phosphorylation	vv50134Primary_active_transporter_cat_D1
VIT_00s0505g00030	1.50388		NADH dehydrogenase subunit 2	K03879	vv10190Oxidative_phosphorylation	vv50134Primary_active_transporter_cat_D1
VIT_00s0629g00010	1.76455		NADH dehydrogenase subunit 4	K03881	vv10190Oxidative_phosphorylation	vv50134Primary_active_transporter_cat_D1
VIT_00s0629g00020	1.66165		NADH dehydrogenase subunit 4	K03881	vv10190Oxidative_phosphorylation	vv50134Primary_active_transporter_cat_D1
VIT_00s0332g00160	1.52357		NADH dehydrogenase subunit 7	K05579	vv10190Oxidative_phosphorylation	vv50134Primary_active_transporter_cat_D1
VIT_00s0246g00100	1.49431		NADH dehydrogenase subunit 7	K05579	vv10190Oxidative_phosphorylation	vv50134Primary_active_transporter_cat_D1
VIT_00s0246g00010	1.44637		NADH dehydrogenase subunit 7	K03935	vv10190Oxidative_phosphorylation	vv50134Primary_active_transporter_cat_D1
VIT_00s0246g00080	1.27754		NADH dehydrogenase subunit 7	K05579	vv10190Oxidative_phosphorylation	vv50134Primary_active_transporter_cat_D1
VIT_00s0332g00170	1.26096		NADH dehydrogenase subunit 7	K05579	vv10190Oxidative_phosphorylation	vv50134Primary_active_transporter_cat_D1
VIT_00s0246g00070	1.03039		NADH dehydrogenase subunit 7	K05579	vv10190Oxidative_phosphorylation	vv50134Primary_active_transporter_cat_D1
VIT_14s0030g01090	-1.16941		Quinone oxidoreductase	K03956	vv10190Oxidative_phosphorylation	vv50134Primary_active_transporter_cat_D1
VIT_09s0002g08330	3.07797		Photosystem I P700 apoprotein A2	K02690	vv10195Photosynthesis	vv50105Transport_electron_carriers
VIT_11s0037g01170	3.89061		Photosystem I P700 chlorophyll A apoprotein A1	K02689	vv10195Photosynthesis	vv50105Transport_electron_carriers
VIT_09s0002g08340	2.89391		Photosystem I P700 chlorophyll a apoprotein A1	K02689	vv10195Photosynthesis	vv50105Transport_electron_carriers
VIT_18s0001g08620	2.86486		Photosystem I P700 chlorophyll a apoprotein A2	K02690	vv10195Photosynthesis	vv50105Transport_electron_carriers
VIT_18s0001g02740	1.058		Photosystem II 22 kDa protein PSBS	K03542	vv10195Photosynthesis
VIT_11s0052g01680	3.20864		Photosystem II protein D1	K02703	vv10195Photosynthesis	vv50135Primary_active_transporter_cat_D3_to_E2
VIT_00s0275g00010	2.82085		Photosystem II protein D2	K02706	vv10195Photosynthesis	vv50135Primary_active_transporter_cat_D3_to_E2
VIT_11s0103g00110	2.52222		Photosystem II protein D2	K02706	vv10195Photosynthesis	vv50135Primary_active_transporter_cat_D3_to_E2
VIT_11s0103g00100	1.77916		Photosystem II protein D2	K02706	vv10195Photosynthesis	vv50135Primary_active_transporter_cat_D3_to_E2
VIT_00s2608g00020	2.48599		Photosystem II PsbB	K02704	vv10195Photosynthesis	vv50135Primary_active_transporter_cat_D3_to_E2
VIT_00s2608g00010	2.21543		Photosystem II PsbB	K02704	vv10195Photosynthesis	vv50135Primary_active_transporter_cat_D3_to_E2
VIT_00s0396g00010	2.52118		Photosystem II PsbC	K02705	vv10195Photosynthesis	vv50135Primary_active_transporter_cat_D3_to_E2
VIT_12s0055g00080	2.79577		Photosystem II PsbD	K02706	vv10195Photosynthesis	vv50135Primary_active_transporter_cat_D3_to_E2
VIT_08s0007g02650	1.44016		Pseudouridine synthase	E4_2_1_70	vv10240Pyrimidine_metabolism
VIT_08s0040g01710	1.0364		Phenylalanine ammonia-lyase	E4_3_1_5	vv10350Tyrosine_metabolism	vv10360Phenylalanine_metabolism	vv10910Nitrogen_metabolism	vv10940Phenylpropanoid_biosynthesis
VIT_08s0058g00990	-1.35174		Peroxidase	E1_11_1_7	vv10360Phenylalanine_metabolism	vv10680Methane_metabolism
VIT_12s0028g01840	-3.98139		Peroxidase	E1_11_1_7	vv10360Phenylalanine_metabolism	vv10680Methane_metabolism
VIT_18s0001g06890	-1.4742		Peroxidase GvPx2b, class III [Vitis vinifera]	E1_11_1_7	vv10360Phenylalanine_metabolism	vv10680Methane_metabolism
VIT_01s0011g05890	1.11796		S-adenosyl-L-methionine:salicylic acid carboxyl methyltransferase	SAMTBSCMT	vv10360Phenylalanine_metabolism
VIT_18s0001g12990	1.23697		Anthranilate N-benzoyltransferase protein 1	E2_3_1_144	vv10400Phenylalanine_tyrosine_and_tryptophan_biosynthesis
VIT_02s0033g01020	-1.23082		Anthraniloyal-CoA: methanol anthraniloyal transferase	AMAT	vv10400Phenylalanine_tyrosine_and_tryptophan_biosynthesis
VIT_02s0033g01000	-1.67822		Anthraniloyal-CoA: methanol anthraniloyal transferase	AMAT	vv10400Phenylalanine_tyrosine_and_tryptophan_biosynthesis
VIT_03s0038g01050	-1.38146		Phenylalanine-tRNA ligase	E6_1_1_20	vv10400Phenylalanine_tyrosine_and_tryptophan_biosynthesis	vv20970Aminoacyl-tRNA_biosynthesis
VIT_17s0000g02930	-1.11643		Glutathione S-transferase 25 GSTU7	E2_5_1_18_GSTU7	vv10480Glutathione_metabolism
VIT_01s0026g01380	1.9319		Glutathione S-transferase 29 GSTU18	E2_5_1_18_GSTU18	vv10480Glutathione_metabolism
VIT_18s0122g00980	-1.12631		Glucan endo-1,3-beta-glucosidase 7 precursor	E3_2_1_39	vv10500Starch_and_sucrose_metabolism
VIT_12s0055g00200	1.83063		UDP-glucose glucosyltransferase	E2_4_1_35	vv10500Starch_and_sucrose_metabolism
VIT_12s0055g00180	1.43646		UDP-glucose glucosyltransferase	E2_4_1_35	vv10500Starch_and_sucrose_metabolism
VIT_08s0032g00890	-1.00003		Alpha-L-arabinosidase	E3_2_1_55	vv10520Nucleotide_sugars_metabolism
VIT_16s0050g02220	-2.33394		Acidic endochitinase (CHIB1)	E3_2_1_14	vv10530Aminosugars_metabolism
VIT_11s0016g02800	-1.54162		Myo-inositol oxygenase	E1_13_99_1	vv10562Inositol_phosphate_metabolism
VIT_17s0000g01010	1.00585		Lysophospholipase homolog	E3_1_1_5	vv10564Glycerophospholipid_metabolism
VIT_14s0066g01670	-2.17026		Alpha-dioxygenase	K10529	vv10592alpha-Linolenic_acid_metabolism
VIT_00s0265g00170	-1.02234		Lipoxygenase	E1_13_11_12	vv10592alpha-Linolenic_acid_metabolism
VIT_02s0087g00630	1.02786		Alcohol oxidase	E1_1_3_13	vv10680Methane_metabolism
VIT_16s0013g00330	2.63336		Ribulose 1,5-bisphosphate carboxylase [Vitis aestivalis]	E4_1_1_39	vv10710Carbon_fixation
VIT_07s0031g03000	2.93245		Ribulose 1,5-bisphosphate carboxylase large subunit	E4_1_1_39	vv10710Carbon_fixation
VIT_07s0129g00790	3.29366		Ribulose bisphosphate carboxylase/oxygenase large subunit	E4_1_1_39	vv10710Carbon_fixation
VIT_17s0000g09160	-1.08325		ferric reduction oxidase 8 FRO8	E1_16_1_7	vv10860Porphyrin_and_chlorophyll_metabolism	vv50105Transport_electron_carriers
VIT_04s0008g01860	-2.07725		CYP72A58	K13400	vv10902Monoterpenoid_biosynthesis
VIT_06s0004g06790	2.3255		Gibberellin 2-beta-dioxygenase 7	E1_14_11_13	vv10904Diterpenoid_biosynthesis
VIT_16s0050g01090	1.19723		Beta-carotene hydroxylase	K02294	vv10906Carotenoid_biosynthesis
VIT_07s0104g00270	-1.68353		Isopentenyltransferase 5	E2_5_1_27	vv10908Zeatin_biosynthesis
VIT_15s0107g00210	1.07968		Cinnamyl alcohol dehydrogenase	E1_1_1_195	vv10940Phenylpropanoid_biosynthesis
VIT_07s0031g01380	-1.40887		ferulate 5-hydroxylase	K09755	vv10940Phenylpropanoid_biosynthesis
VIT_16s0100g00780	-1.1536		Stilbene synthase	E2_3_1_95	vv10940Phenylpropanoid_biosynthesis
VIT_10s0042g00920	-1.70666		Stilbene synthase	E2_3_1_95	vv10940Phenylpropanoid_biosynthesis
VIT_16s0100g00940	-1.62249		Stilbene synthase 3 [Vitis sp. cv. 'Norton']	E2_3_1_95	vv10940Phenylpropanoid_biosynthesis
VIT_16s0100g00860	-1.92116		Chalcone synthase	E2_3_1_74	vv10941Flavonoid_biosynthesis
VIT_14s0068g00920	-1.51495		Chalcone synthase (CHS)	E2_3_1_74	vv10941Flavonoid_biosynthesis
VIT_00s1682g00020	-1.05627		flavonoid 3'-hydroxylase cytochrome P450	E1_14_13_21	vv10941Flavonoid_biosynthesis
VIT_15s0046g01990	1.24		UDP-glucosyltransferase	E2_4_1_81	vv10941Flavonoid_biosynthesis
VIT_15s0046g01980	1.0568		UDP-glucosyltransferase	E2_4_1_81	vv10941Flavonoid_biosynthesis
VIT_15s0046g01970	1.38021		Anthocyanidine rhamnosyl-transferase	RHATR	vv10942Anthocyanin_biosynthesis
VIT_12s0028g01940	-1.5819		Isoflavone methyltransferase/ Orcinol O-methyltransferase 1 oomt1	E2_1_1_46	vv10943Isoflavonoid_biosynthesis
VIT_18s0164g00100	1.49126		Laccase	E1_10_3_2	vv11000Single_reactions	vv50109Incompletely_characterized_transport_systems
VIT_15s0046g00630	1.93352		Wax synthase	E2_3_1_75	vv11000Single_reactions
VIT_15s0046g00710	1.75912		Wax synthase	E2_3_1_75	vv11000Single_reactions
VIT_15s0046g00700	1.65761		Wax synthase	E2_3_1_75	vv11000Single_reactions
VIT_03s0091g00310	1.21012		Indole-3-acetic acid-amido synthetase GH3.8	AUXINBIOSYNTHESIS_GH3	vv11002Auxin_biosynthesis
VIT_11s0037g01180	3.11426		23S ribosomal RNA	K01982	vv23008Ribosome_biogenesis_in_Eukaryotes	vv23010Ribosome
VIT_01s0010g01260	3.0818		23S ribosomal RNA	K01982	vv23008Ribosome_biogenesis_in_Eukaryotes	vv23010Ribosome
VIT_17s0000g06990	1.41055		Ribosomal protein L2	K02886	vv23010Ribosome
VIT_00s0873g00010	1.39385		Ribosomal protein L2	K02886	vv23010Ribosome
VIT_16s0039g00380	2.12675		Ribosomal protein S14 30S	K02954	vv23010Ribosome
VIT_13s0101g00220	3.04059		Ribosomal RNA 16S	K01977	vv23010Ribosome
VIT_12s0035g02010	2.3701		Ribosomal RNA 23S	K01980	vv23010Ribosome
VIT_01s0010g01830	-1.07851		Regulator of nonsense transcripts 1	K14326	vv23013RNA_transport	vv23015mRNA_surveillance_pathway
VIT_16s0050g02330	-1.72402		Regulator of nonsense transcripts 1	K14326	vv23013RNA_transport	vv23015mRNA_surveillance_pathway
VIT_01s0010g02590	-1.0058		ATP-dependent DNA helicase RecQ	K10901	vv23440Homologous_recombination	vv50122Porters_cat_7_to_17
VIT_18s0089g01270	1.41425		Heat shock protein precursor 22.0 kDa class IV	K13993	vv24141Protein_processing_in_endoplasmic_reticulum
VIT_02s0025g01630	1.45956		SOS3 (salt overly sensitive 3)	SOS3	vv30001ABA_signaling
VIT_08s0007g00440	-1.70633		Alpha-expansin 6 precursor	EXPA6	vv30003Auxin_signaling
VIT_13s0019g00110	-1.26614		Auxin response factor 1	ARF1_1	vv30003Auxin_signaling	vv60004ARF
VIT_16s0098g01150	1.38317		Auxin-responsive SAUR29	SAUR29	vv30003Auxin_signaling
VIT_03s0180g00040	1.17191		Cyclin D3_2	CYCD3	vv30007Cytokinin_signaling	vv44110Cell_cycle
VIT_16s0100g00380	-2.09783		DREB sub A-1 of ERF/AP2 transcription factor (CBF4)	VvERF022	vv30008Ethylene_signaling	vv60003AP2_EREBP
VIT_08s0007g03050	-1.50069		E8 protein	E8	vv30008Ethylene_signaling
VIT_16s0013g00890	-1.07063		Ethylene-responsive element binding factor	VvERF077	vv30008Ethylene_signaling	vv60003AP2_EREBP
VIT_00s0341g00080	-2.29661		Protein TINY 2 DREB3	VvERF030/032	vv30008Ethylene_signaling	vv60003AP2_EREBP
VIT_17s0000g07420	-1.44415		EDS1 (Enhanced disease susceptibility 1)	EDS1	vv30011Jasmonate_signaling
VIT_05s0020g04240	-1.15201		Calcium-transporting ATPase 12 ACA12	K01537	vv34020Calcium_signaling_pathway	vv50131Primary_active_transporter_cat_A2_to_A4
VIT_00s0179g00280	-1.42355		Calmodulin-8 (CAM8)	K02183	vv34020Calcium_signaling_pathway	vv34626Plant-pathogen_interaction
VIT_14s0068g02290	-1.10318		Disease resistance protein	K13466	vv34626Plant-pathogen_interaction
VIT_00s0316g00010	-1.25147		Disease resistance protein	K13466	vv34626Plant-pathogen_interaction
VIT_08s0007g02110	-1.5332		EFR (EF-TU receptor)	K13428	vv34626Plant-pathogen_interaction
VIT_10s0042g00460	-1.00846		RPS2 (resistant to p. syringae 2)	K13459	vv34626Plant-pathogen_interaction
VIT_15s0046g02750	-1.30772		R protein PRF disease resistance protein	K13453	vv34627R_proteins_from_Plant-pathogen_interaction
VIT_18s0089g00450	-1.04668		R protein L6	K13477	vv34627R_proteins_from_Plant-pathogen_interaction
VIT_18s0001g06110	-1.05717		R protein L6	K13477	vv34627R_proteins_from_Plant-pathogen_interaction
VIT_18s0041g02120	-1.0674		R protein L6	K13477	vv34627R_proteins_from_Plant-pathogen_interaction
VIT_18s0089g00600	-1.10531		R protein L6	K13477	vv34627R_proteins_from_Plant-pathogen_interaction
VIT_12s0034g00280	-1.14546		R protein L6	K13477	vv34627R_proteins_from_Plant-pathogen_interaction
VIT_18s0001g05050	-1.18247		R protein L6	K13477	vv34627R_proteins_from_Plant-pathogen_interaction
VIT_00s0184g00120	-1.47106		R protein L6	K13477	vv34627R_proteins_from_Plant-pathogen_interaction
VIT_19s0027g01490	-1.15173		R protein MLA10	K13475	vv34627R_proteins_from_Plant-pathogen_interaction
VIT_19s0027g01350	-1.15497		R protein MLA10	K13475	vv34627R_proteins_from_Plant-pathogen_interaction
VIT_19s0027g01170	-1.25677		R protein MLA10	K13475	vv34627R_proteins_from_Plant-pathogen_interaction
VIT_09s0002g05050	-1.05224		RPS5 (resistant to p. syringae 5)	K13460	vv34627R_proteins_from_Plant-pathogen_interaction
VIT_14s0066g01730	-1.25613		Cellulose synthase CSLC04	E2_4_1_12_CSLC04	vv40006Cell_wall
VIT_03s0038g04120	-1.03333		Cellulose synthase CSLD4	E2_4_1_12_CSLD4	vv40006Cell_wall
VIT_00s0469g00040	-1.39144		Cellulose synthase CSLE1	E2_4_1_12_CSLE1	vv40006Cell_wall
VIT_02s0025g01900	-1.08422		Cellulose synthase CSLG3	E2_4_1_12_CSLG3	vv40006Cell_wall
VIT_02s0025g01980	-1.17259		Cellulose synthase CSLG3	E2_4_1_12_CSLG3	vv40006Cell_wall
VIT_12s0028g02990	2.1783		fasciclin arabinogalactan-protein (FLA13)	FLA13	vv40006Cell_wall
VIT_16s0022g00890	1.44402		Invertase/pectin methylesterase inhibitor	PMEI	vv40006Cell_wall
VIT_16s0050g00570	1.46399		Pectinacetylesterase	PAE	vv40006Cell_wall
VIT_11s0052g01340	-1.67216		Xyloglucan endo-transglycosylase, C-terminal	E2_4_1_207	vv40006Cell_wall
VIT_11s0052g01190	-1.51846		Xyloglucan endotransglucosylase-hydrolase XTH3	E2_4_1_207	vv40006Cell_wall
VIT_11s0052g01260	-1.02708		Xyloglucan endotransglucosylase/hydrolase 23	E2_4_1_207	vv40006Cell_wall
VIT_11s0052g01180	-1.17801		Xyloglucan endotransglucosylase/hydrolase 23	E2_4_1_207	vv40006Cell_wall
VIT_10s0003g02440	-1.18735		Xyloglucan endotransglucosylase/hydrolase 23	E2_4_1_207	vv40006Cell_wall
VIT_11s0052g01230	-1.58495		Xyloglucan endotransglucosylase/hydrolase 23	E2_4_1_207	vv40006Cell_wall
VIT_11s0052g01200	-1.83105		Xyloglucan endotransglucosylase/hydrolase 23	E2_4_1_207	vv40006Cell_wall
VIT_10s0116g00520	-1.30723		Xyloglucan endotransglucosylase/hydrolase 8	E2_4_1_207	vv40006Cell_wall
VIT_11s0052g01300	-1.01097		Xyloglucan endotransglycosylase 6	E2_4_1_207	vv40006Cell_wall
VIT_17s0000g08320	-1.17061		Ataxia-telangiectasia mutated protein (Atm)	K04728	vv44110Cell_cycle
VIT_17s0000g08480	1.12569		MYB domain protein 157	VvMYB157	vv44110Cell_cycle	vv60044MYB
VIT_07s0129g01100	-1.11997		Cyclin D	CYCD3_3	vv44110Cell_cycle
VIT_17s0000g02450	1.62434		Tubulin beta-6	K07375	vv44145Phagosome	vv44810Regulation_of_actin_cytoskeleton
VIT_14s0060g02330	-1.32053		Actin binding formin homology 1	FH2	vv44810Regulation_of_actin_cytoskeleton
VIT_13s0067g00330	-1.37199		AUX1 auxin influx carrier protein	AUX1	vv50004Auxin_transport	vv50123Porters_cat_18_to_29
VIT_00s0780g00040	-1.27556		RGLG2 (ring Domain LIGASE2)	RGLG2	vv50004Auxin_transport
VIT_13s0019g00750	-1.58616		Annexin ANN4	ANN4	vv50101Channels_and_pores
VIT_19s0014g01770	1.63301		Glutamate receptor protein	GLR2_7	vv50101Channels_and_pores
VIT_11s0016g00540	2.34525		Respiratory burst oxidase protein E (RBOHE)	RBOHE	vv50105Transport_electron_carriers
VIT_00s0246g00060	2.44525		Cytochrome c-type biogenesis protein CcmF	K02198	vv50109Incompletely_characterized_transport_systems
VIT_00s0332g00130	1.76102		Cytochrome c-type biogenesis protein CcmF	K02198	vv50109Incompletely_characterized_transport_systems
VIT_07s0104g01120	-1.75603		Rac GTPase activating protein	RHOGAP	vv50109Incompletely_characterized_transport_systems
VIT_00s0179g00370	-1.25958		ESCRT-I complex subunit TSG101	VPS23	vv50111Tethering_factors
VIT_00s0317g00140	1.00202		Exocyst subunit EXO70 H2	EXO70H2	vv50111Tethering_factors
VIT_19s0085g00650	-1.45634		Cation efflux family	CAEFF	vv50121Porters_cat_1_to_6
VIT_05s0049g00930	-1.57112		Inorganic phosphate transporter 1-4	PHT1_4	vv50121Porters_cat_1_to_6
VIT_02s0154g00510	1.0624		SEC14 cytosolic factor	SEC14	vv50122Porters_cat_7_to_17
VIT_18s0001g04890	-1.58315		Low affinity sulphate transporter	AST68	vv50124Porters_cat_30_to_64
VIT_18s0086g00180	1.07726		MATE efflux family protein	MATE	vv50125Porters_cat_66_to_94
VIT_06s0004g06890	1.01489		Potassium transporter (KUP1)	KUP1	vv50125Porters_cat_66_to_94
VIT_07s0031g02550	-1.95498		ABC transporter G member 14	ABCG14	vv52010ABC_transporters
VIT_05s0020g00680	-1.16031		ABC transporter G member 21	ABCG21	vv52010ABC_transporters
VIT_10s0092g00770	2.28414		Cytochrome c biogenesis orf256	K02195	vv52010ABC_transporters
VIT_19s0014g03560	-1.01306		High-level expression of sugar-inducible gene 2	HSI2_2	vv60001ABI3VP1
VIT_18s0001g07410	1.83963		Basic helix-loop-helix (bHLH) family	BHLHDOM_65	vv60011BHLH
VIT_00s0479g00020	-1.39353		Basic helix-loop-helix (bHLH) family	BHLHDOM_21	vv60011BHLH
VIT_00s0880g00010	-1.39748		Basic helix-loop-helix (bHLH) family	BHLHDOM_95	vv60011BHLH
VIT_00s2739g00010	-1.87034		Basic helix-loop-helix (bHLH) family	BHLHDOM_71	vv60011BHLH
VIT_00s1312g00010	-2.04481		Basic helix-loop-helix (bHLH) family	BHLHDOM_70	vv60011BHLH
VIT_04s0023g02430	-1.02039		VvbZIP13	VvbZIP13	vv60012BZIP
VIT_03s0091g00690	2.02939		Salt tolerance zinc finger	STZ_1	vv60017C2H2
VIT_18s0001g03670	2.39491		Zinc finger (C2H2 type) family	C2H2FAM_10	vv60017C2H2
VIT_07s0031g02160	1.00521		Protein phosphatase 2C DBP	DBPPP2C_2	vv60024DBP
VIT_02s0033g00300	1.50776		Myb family	MYBGE_8	vv60029G2-like
VIT_18s0001g13130	-1.68029		BEL1-like homeodomain 10	BEL10	vv60034HB
VIT_01s0026g01550	1.25175		Homeodomain leucine zipper protein HB-1	VVHB1_4	vv60034HB
VIT_11s0118g00800	1.14963		KNAT2 (knotted1-like homeobox gene 3)	KNAT3_2	vv60034HB
VIT_14s0006g01280	1.72497		Myb domain protein A7	VvMYBA7	vv60044MYB
VIT_05s0020g01100	1.60752		Myb domain protein 146	VvMYB146	vv60044MYB
VIT_06s0004g00020	1.58662		NAC domain containing protein 44	VvNAC44	vv60046NAC
VIT_03s0038g03410	-1.36094		NAC domain containing protein 41	VvNAC41	vv60046NAC
VIT_02s0012g01040	-1.63672		NAC domain-containing protein 13	VvNAC13	vv60046NAC
VIT_15s0048g02300	-1.44218		NAC domain-containing protein 53	VvNAC53	vv60046NAC
VIT_15s0048g02270	-1.40061		NAC domain-containing protein 55	VvNAC55	vv60046NAC
VIT_15s0048g02290	-2.55202		NAC domain-containing protein 54	VvNAC54	vv60046NAC
VIT_00s0956g00030	-1.17544		DNA-binding protein	GTREL_2	vv60062Trihelix
VIT_04s0008g05750	-1.1283		VvWRKY07	VvWRKY07	vv60066WRKY
VIT_19s0015g02470	-1.15177		Zinc finger (C3HC4-type ring finger)	ZFC3HC4_72	vv60078Other_zf-C3HC4
VIT_02s0025g01990	-2.21434		Zinc finger (C3HC4-type ring finger)	ZFC3HC4_132	vv60078Other_zf-C3HC4
VIT_06s0004g07910	-1.86397		Ovate family protein 3 OFP3	OFP3_2	vv60086OFP
VIT_17s0000g07010	-1.03236		5-azacytidine resistance
VIT_12s0059g00590	1.18912		Allergenic protein Pt2L4
VIT_10s0003g04500	1.78443		Ankyrin	K10380
VIT_06s0061g01040	-1.2813		Argonaute protein
VIT_18s0001g07340	-4.2924		Aspartic proteinase nepenthesin-1 precursor	E3_4_23_12
VIT_06s0080g01160	-1.44052		Aspartyl protease	E3_4_23_x
VIT_09s0018g01670	-1.49084		Aspartyl protease	E3_4_23_x
VIT_09s0070g00850	-1.00157		ATP binding
VIT_17s0000g00730	-1.32062		ATP binding / DNA binding
VIT_08s0056g01160	1.251		BDG1 (BODYGUARD1) hydrolase
VIT_01s0026g00570	1.21824		Bet v I allergen
VIT_12s0059g01120	1.06363		CAF protein
VIT_08s0007g07190	-1.08355		Calmodulin-binding region IQ
VIT_06s0061g00890	-1.39039		Carboxypeptidase	E3_4_17_22
VIT_00s0208g00130	-1.1129		CBL-interacting protein kinase 23
VIT_19s0014g03090	-1.09378		CBS domain-containing protein
VIT_04s0008g07140	-2.24466		Chloroplast nucleoid DNA binding protein
VIT_04s0008g00300	-1.01954		Clavata1 receptor kinase (CLV1)
VIT_04s0008g00370	-1.20058		Clavata1 receptor kinase (CLV1)
VIT_01s0026g02700	1.6653		CYP704G9
VIT_15s0024g01830	2.19206		CYP706A12
VIT_18s0001g11480	-1.3963		CYP82C4
VIT_16s0039g00820	-1.63078		CYP89A5
VIT_04s0023g00920	-1.97144		DCL2 (DICER 2)	DCL2
VIT_06s0004g00990	-1.38669		Dirigent protein
VIT_06s0004g01020	-1.41025		Dirigent protein
VIT_09s0002g09290	-1.37309		Disease resistance protein
VIT_13s0047g00740	-1.01333		Disease resistance protein (NBS class)
VIT_00s0275g00060	-1.48128		Disease resistance protein (TIR-NBS-LRR class)
VIT_01s0011g03440	1.05582		DNA mismatch repair protein
VIT_01s0011g02930	-1.81368		DNA-binding protein, chloroplast nucleoid
VIT_11s0016g04920	3.20314		Early nodulin 93
VIT_09s0070g00560	-1.27711		EIX receptor
VIT_16s0022g00240	-1.10372		EIX receptor 2
VIT_08s0032g00140	-1.21957		F-box family protein
VIT_14s0128g00690	-1.47747		Germin protein 3
VIT_02s0025g02600	1.43955		Glyoxal oxidase
VIT_16s0050g02120	-1.08666		HcrVf3 protein
VIT_00s2419g00010	1.70138		Heavy-metal-associated domain-containing protein
VIT_16s0050g01250	-1.02294		Heavy-metal-associated domain-containing protein
VIT_07s0104g00980	-1.03805		Histone H2AXa HTA5	H2AXa
VIT_18s0001g05710	1.04151		Hydrolase, alpha/beta fold
VIT_08s0040g02210	1.31659		Lectin protein kinase
VIT_06s0004g03930	-1.13705		Leucine-rich repeat protein kinase
VIT_12s0142g00800	-2.56898		Leucine-rich repeat protein kinase
VIT_16s0098g00460	-1.84313		Lipase class 3
VIT_09s0002g03140	-1.6911		Lipase GDSL
VIT_12s0055g01140	1.48455		Lipid transfer protein	LTP
VIT_01s0011g05110	-1.63857		Major latex protein 22
VIT_00s0332g00010	2.16261		Maturase matR
VIT_00s0332g00030	2.00727		Maturase matR
VIT_03s0091g01130	-1.2594		Meprin and TRAF homology domain-containing protein
VIT_13s0019g05340	3.13099		No hit
VIT_00s0125g00070	2.52481		No hit
VIT_08s0040g00640	2.50305		No hit
VIT_13s0019g05350	2.49633		No hit
VIT_08s0058g01160	2.27767		No hit
VIT_05s0051g00700	2.20344		No hit
VIT_05s0049g00740	2.02664		No hit
VIT_01s0010g02850	1.85339		No hit
VIT_05s0051g00690	1.77392		No hit
VIT_08s0056g01610	1.58142		No hit
VIT_00s0246g00120	1.41969		No hit
VIT_05s0049g00750	1.2054		No hit
VIT_00s0246g00210	1.19235		No hit
VIT_12s0134g00470	1.15505		No hit
VIT_05s0124g00080	1.11413		No hit
VIT_00s0301g00080	1.04314		No hit
VIT_06s0080g00640	-1.01193		No hit
VIT_02s0033g01200	-1.015		No hit
VIT_09s0002g07950	-1.04351		No hit
VIT_14s0030g01000	-1.07887		No hit
VIT_00s0467g00040	-1.1134		No hit
VIT_13s0019g04880	-1.26363		No hit
VIT_10s0042g00530	-1.28066		No hit
VIT_05s0077g01920	-1.32098		No hit
VIT_14s0068g00140	-1.36023		No hit
VIT_13s0064g00790	-1.40678		No hit
VIT_13s0064g00350	-1.42209		No hit
VIT_18s0001g01460	-1.5394		No hit
VIT_07s0031g01950	-1.55337		No hit
VIT_07s0141g01050	-1.64629		No hit
VIT_12s0057g00950	-1.65465		No hit
VIT_00s0226g00170	-1.89529		No hit
VIT_11s0016g05830	-2.64131		No hit
VIT_06s0004g07680	-1.40072		Nodulin
VIT_01s0146g00260	-1.80211		Nodulin MtN3
VIT_08s0058g01230	1.24145		Non-specific lipid-transfer protein
VIT_12s0035g01050	1.32993		Octicosapeptide/Phox/Bem1p (PB1) domain-containing protein
VIT_05s0077g01600	-1.41115		Pathogenesis protein 10 [Vitis vinifera]
VIT_06s0009g03510	-1.15207		Pentatricopeptide (PPR) repeat-containing protein
VIT_06s0004g04770	-1.00138		Pentatricopeptide repeat-containing protein
VIT_03s0038g03850	1.4397		PGPS/NH21
VIT_18s0001g06170	-1.17913		Phosphate-induced protein 1
VIT_18s0001g06020	-1.33147		Phosphate-induced protein 1
VIT_18s0001g06150	-1.42279		Phosphate-induced protein 1
VIT_00s0361g00090	-1.06804		Phototropic-responsive NPH3 protein
VIT_00s0194g00300	1.05854		Proline-rich family protein
VIT_03s0038g01830	-1.1886		Proline-rich protein 4
VIT_00s0399g00020	-1.17724		Protease inhibitor/seed storage/lipid transfer protein (LTP)
VIT_11s0016g05840	-1.3667		Protease inhibitor/seed storage/lipid transfer protein (LTP)
VIT_02s0154g00310	-1.9839		Protease inhibitor/seed storage/lipid transfer protein (LTP)
VIT_01s0011g03800	-1.11576		Protein kinase
VIT_07s0031g01920	-1.16258		Protein kinase CRK1 CRK1 protein(Cdc2-related kinase 1)
VIT_04s0008g03950	-1.18245		RD22
VIT_01s0011g05880	-1.11733		RDR1 (RNA-dependent RNA polymerase 1)	K00985
VIT_01s0011g05870	-1.54525		RDR1 (RNA-dependent RNA polymerase 1)	K00985
VIT_04s0008g05430	-1.01851		RDR6 (RNA-dependent RNA polymerase 6)
VIT_16s0050g02700	-1.21871		Receptor kinase homolog LRK10
VIT_16s0148g00280	-1.31665		Receptor kinase homolog LRK10
VIT_16s0050g02720	-1.7022		Receptor kinase homolog LRK10
VIT_16s0148g00060	-2.03934		Receptor kinase homolog LRK10
VIT_16s0148g00010	-2.28669		Receptor kinase homolog LRK10
VIT_00s0388g00050	-1.35473		Receptor kinase homolog LRK14
VIT_16s0050g00010	-1.38059		Receptor kinase homolog LRK14
VIT_00s0485g00010	-1.94101		Receptor kinase homolog LRK14
VIT_12s0028g01850	-1.02076		Receptor kinase TRKe
VIT_12s0057g00800	-1.38027		Receptor Like Protein 27
VIT_06s0004g06430	-1.54921		Receptor ser/thr protein kinase
VIT_00s0425g00040	-1.51806		Receptor serine/threonine kinase
VIT_15s0048g00520	-1.0339		Receptor-like protein kinase
VIT_16s0148g00070	-1.05028		Receptor-like protein kinase
VIT_19s0014g03770	-1.11752		Retrotransposon
VIT_19s0014g02060	-1.01548		Retrotransposon protein
VIT_00s0125g00020	2.65727		Reverse transcriptase
VIT_09s0018g01280	1.05187		Ribulose bisphosphate carboxylase/oxygenase activase 2
VIT_01s0011g02800	-1.04531		RIC7 (ROP-interactive crib motif-containing protein 7)
VIT_13s0019g01020	-1.28331		Ring-H2 finger protein ATL3A
VIT_17s0000g08720	-1.47226		RKF2 (receptor-like serine/threonine kinase 2)
VIT_11s0016g03220	-1.08952		RNA-directed RNA polymerase	K00985
VIT_16s0050g02710	-1.26806		RPK1 (receptor-like protein kinase 1)
VIT_09s0002g00600	-1.54154		RPP27 (resistance to peronospora parasitica 27)
VIT_10s0042g00240	-1.82855		Rpp4 candidate 1
VIT_17s0053g00400	-1.41601		S-receptor protein kinase
VIT_16s0148g00020	-1.17268		Ser/Thr receptor-like kinase1
VIT_00s0294g00090	-1.21344		Ser/Thr receptor-like kinase1
VIT_16s0148g00220	-2.15808		Ser/Thr receptor-like kinase1
VIT_10s0042g01050	1.28747		Serine carboxypeptidase II
VIT_18s0001g15550	-1.88004		Serine carboxypeptidase II
VIT_06s0004g01780	-1.86094		Serine/threonine-protein kinase OXI1
VIT_02s0154g00300	-2.17988		Small nuclear ribonucleoprotein Sm D3	K04796
VIT_16s0098g01870	-1.12998		SOS3 (salt overly sensitive 3)	E3_1_3_16
VIT_14s0083g00240	-1.01208		Stress protein
VIT_13s0019g02490	-1.31455		Subtilisin protease C1
VIT_13s0019g02530	-1.46085		Subtilisin protease C1
VIT_02s0025g04270	-2.79645		Thaumatin
VIT_02s0025g04230	-2.52001		Thaumatin [Vitis vinifera]
VIT_00s0160g00320	-1.39515		TIR-NBS-LRR type R protein 7
VIT_00s0160g00090	-1.12566		TIR-NBS-LRR-TIR disease resistance protein
VIT_18s0041g01520	-1.22866		TIR-NBS-LRR-TIR disease resistance protein
VIT_08s0056g00180	1.01972		Translation initiation factor IF-2B subunit delta	K03680
VIT_08s0007g04570	-1.16455		UGT73D1 (UDP-glucosyl transferase 73D1); UDP-glycosyltransferase
VIT_00s0125g00060	2.86525		Unknown
VIT_13s0101g00210	2.62678		Unknown
VIT_00s0505g00040	2.0395		Unknown
VIT_06s0004g02780	1.78848		Unknown
VIT_02s0012g00720	1.43606		Unknown
VIT_05s0049g00570	1.35224		Unknown
VIT_06s0004g00960	1.35158		Unknown
VIT_03s0038g00710	1.15744		Unknown
VIT_14s0066g00300	1.10691		Unknown
VIT_00s1188g00010	-1.18098		Unknown
VIT_03s0088g00350	-1.21792		Unknown
VIT_11s0065g01110	-1.50588		Unknown
VIT_13s0073g00590	3.59572		Unknown protein
VIT_15s0021g02070	1.68379		Unknown protein
VIT_18s0001g11950	1.5717		Unknown protein
VIT_14s0060g00900	1.19165		Unknown protein
VIT_07s0031g02520	1.18187		Unknown protein
VIT_02s0087g00560	1.10553		Unknown protein
VIT_08s0007g02970	1.07999		Unknown protein
VIT_07s0005g02450	1.03723		Unknown protein
VIT_15s0046g03240	-1.01783		Unknown protein
VIT_01s0011g03330	-1.11529		Unknown protein
VIT_15s0021g02370	-1.18332		Unknown protein
VIT_03s0063g01940	-1.19504		Unknown protein
VIT_10s0003g00910	-1.28014		Unknown protein
VIT_16s0098g01740	-1.29036		Unknown protein
VIT_00s0199g00090	-1.36215		Unknown protein
VIT_17s0000g07950	-1.49134		Unknown protein
VIT_06s0004g06820	-1.5305		Unknown protein
VIT_15s0046g03290	-1.57858		Unknown protein
VIT_04s0008g01700	-2.35687		Unknown protein
VIT_18s0001g01310	-1.27287		Wall-associated receptor kinase 5
VIT_18s0001g01300	-1.46302		Wall-associated receptor kinase 5
VIT_03s0132g00340	-1.28304		Wall-associated receptor kinase-like 10
	LogFC19	LogFC44	Functional.annotation	briefname..EC.or.Kegg.ID	Network1	Network2	Network3	Network4	Network5	Network6	Network7	Network8
VIT_01s0026g00220	1.67048	2.08345	Aldehyde dehydrogenase 1 precursor	E1_2_1_3	vv10010Glycolysis	vv10071Fatty_acid_metabolism	vv10220Urea_cycle_and_metabolism_of_amino_groups	vv10280Valine_leucine_and_isoleucine_degradation	vv10340Histidine_metabolism	vv10410Beta-alanine_metabolism	vv10561Glycerolipid_metabolism	vv10620Pyruvate_metabolism
VIT_01s0137g00080	1.17132	2.24506	Aldehyde dehydrogenase (NAD+)	E1_2_1_3	vv10010Glycolysis	vv10071Fatty_acid_metabolism	vv10220Urea_cycle_and_metabolism_of_amino_groups	vv10280Valine_leucine_and_isoleucine_degradation	vv10340Histidine_metabolism	vv10410Beta-alanine_metabolism	vv10561Glycerolipid_metabolism	vv10620Pyruvate_metabolism
VIT_14s0060g00420	1.01749	1.19045	Pyruvate dehydrogenase kinase	E2_7_11_2	vv10010Glycolysis	vv10252Alanine_and_aspartate_metabolism	vv10290Valine_leucine_and_isoleucine_biosynthesis	vv10620Pyruvate_metabolism
VIT_05s0049g00950	1.02155	1.41874	Phosphoenolpyruvate carboxylase kinase	E4_1_1_49	vv10020Citrate_cycle	vv10620Pyruvate_metabolism	vv10710Carbon_fixation
VIT_12s0057g01030	1.30947	1.26107	Glucose-6-phosphate 1-dehydrogenase 2, chloroplast precursor	E1_1_1_49	vv10030Pentose_phosphate	vv10480Glutathione_metabolism
VIT_00s0346g00110	1.21589	1.54935	Mannitol dehydrogenase	E1_1_1_67	vv10051Fructose_and_mannose_metabolism
VIT_00s0371g00050	1.14415	1.52379	Mannitol dehydrogenase	E1_1_1_67	vv10051Fructose_and_mannose_metabolism
VIT_04s0044g00190	-1.28585	-1.64804	Mannitol dehydrogenase	E1_1_1_67	vv10051Fructose_and_mannose_metabolism
VIT_05s0077g00430	4.71779	5.33443	Galactinol synthase	E2_4_1_123	vv10052Galactose_metabolism
VIT_07s0005g01680	1.73163	3.16063	Stachyose synthase	E2_4_1_67	vv10052Galactose_metabolism
VIT_07s0005g01970	2.46426	2.2815	Galactinol synthase	E2_4_1_123	vv10052Galactose_metabolism
VIT_08s0007g08310	1.53458	3.49646	Alkaline alpha galactosidase	E3_2_1_22	vv10052Galactose_metabolism	vv10561Glycerolipid_metabolism
VIT_11s0016g02200	1.28611	2.57758	Beta-galactosidase	E3_2_1_23	vv10052Galactose_metabolism	vv10511N-Glycan_degradation	vv10600Sphingolipid_metabolism
VIT_11s0016g05770	1.74342	4.10445	Alkaline alpha galactosidase 2	E3_2_1_22	vv10052Galactose_metabolism	vv10561Glycerolipid_metabolism
VIT_14s0060g00760	1.92542	3.9208	Galactinol synthase	E2_4_1_123	vv10052Galactose_metabolism
VIT_14s0060g00790	1.82104	4.19117	Galactinol synthase	E2_4_1_123	vv10052Galactose_metabolism
VIT_14s0066g00810	2.04305	2.99056	Raffinose synthase	E2_4_1_82	vv10052Galactose_metabolism
VIT_08s0040g03150	1.51666	1.44795	L-ascorbate peroxidase 1, cytosolic (APX1)	E1_11_1_11	vv10053Ascorbate_and_aldarate_metabolism
VIT_07s0141g00090	1.1397	1.18566	Fatty acid elongase 1	E2_3_1_41	vv10061Fatty_acid_biosynthesis
VIT_15s0048g02720	1.14767	1.72936	fatty acid elongase	E2_3_1_41	vv10061Fatty_acid_biosynthesis
VIT_04s0044g01740	1.01413	1.18111	3-hydroxy-3-methylglutaryl-coenzyme A reductase 3	E1_1_1_34	vv10100Biosynthesis_of_steroids	vv50121Porters_cat_1_to_6
VIT_17s0000g01050	1.14587	1.1529	Corticosteroid 11-beta-dehydrogenase isozyme 1	E1_1_1_146	vv10140C21-Steroid_hormone_metabolism
VIT_13s0019g02630	2.76676	3.54649	Photosystem II PsbA	K02703	vv10195Photosynthesis	vv50135Primary_active_transporter_cat_D3_to_E2
VIT_05s0020g03200	-2.1625	-2.89065	Spermine synthase	E2_5_1_22	vv10220Urea_cycle_and_metabolism_of_amino_groups
VIT_07s0031g02700	-1.00806	-1.3697	Amidase	E3_5_1_4	vv10220Urea_cycle_and_metabolism_of_amino_groups	vv10360Phenylalanine_metabolism	vv11002Auxin_biosynthesis	vv50133Primary_active_transporter_cat_A9_to_A18
VIT_13s0019g02180	1.31647	2.342	Tropinone reductase	E1_1_1_206	vv10220Urea_cycle_and_metabolism_of_amino_groups
VIT_17s0000g08680	-1.35992	-2.33823	IMP dehydrogenase/GMP reductase	E1_1_1_205	vv10230Purine_metabolism
VIT_01s0010g00240	2.25334	3.19837	CTP-synthetase	E6_3_4_2	vv10240Pyrimidine_metabolism
VIT_16s0039g02750	1.19494	1.97635	NADH glutamate dehydrogenase	E1_4_1_3	vv10251Glutamate_metabolism	vv10330Arginine_and_proline_metabolism	vv10910Nitrogen_metabolism
VIT_11s0016g04960	1.23814	1.40532	Aspartate-glutamate racemase	E5_1_1_13	vv10252Alanine_and_aspartate_metabolism
VIT_03s0038g02090	1.17607	1.73497	Phospholipase C.	E3_1_4_3	vv10260Glycine_serine_and_threonine_metabolism	vv10562Inositol_phosphate_metabolism	vv10564Glycerophospholipid_metabolism	vv10565Ether_lipid_metabolism	vv34020Calcium_signaling_pathway
VIT_06s0009g03350	-1.71289	-1.91478	Phosphatidylglycerol specific phospholipase C	E3_1_4_3	vv10260Glycine_serine_and_threonine_metabolism	vv10562Inositol_phosphate_metabolism	vv10564Glycerophospholipid_metabolism	vv10565Ether_lipid_metabolism	vv34020Calcium_signaling_pathway
VIT_08s0105g00300	1.18876	1.46548	Phospholipase C	E3_1_4_3	vv10260Glycine_serine_and_threonine_metabolism	vv10562Inositol_phosphate_metabolism	vv10564Glycerophospholipid_metabolism	vv10565Ether_lipid_metabolism	vv34020Calcium_signaling_pathway
VIT_02s0025g02560	1.86118	1.75077	O-succinylhomoserine sulfhydrylase	E2_5_1_48	vv10271Methionine_metabolism	vv10272Cysteine_metabolism	vv10450Selenoamino_acid_metabolism	vv10920Sulfur_metabolism
VIT_19s0014g02190	1.59037	3.74253	Tyrosine aminotransferase	E2_6_1_5	vv10271Methionine_metabolism	vv10350Tyrosine_metabolism	vv10360Phenylalanine_metabolism	vv10400Phenylalanine_tyrosine_and_tryptophan_biosynthesis	vv10950Alkaloid_biosynthesis_I
VIT_18s0001g08450	1.17404	1.51314	Branched-chain-amino-acid transaminase ATBCAT-2	E2_6_1_42	vv10280Valine_leucine_and_isoleucine_degradation	vv10290Valine_leucine_and_isoleucine_biosynthesis	vv10770Pantothenate_and_CoA_biosynthesis	vv10966Glucosinolate_biosynthesis
VIT_04s0008g01040	1.14637	1.19764	Lysine decarboxylase	E4_1_1_18	vv10300Lysine_biosynthesis
VIT_08s0040g01780	2.34803	3.27894	Lysine decarboxylase	E4_1_1_18	vv10300Lysine_biosynthesis
VIT_03s0038g04730	1.15128	1.33519	Polyphenol oxidase	E1_10_3_1	vv10350Tyrosine_metabolism	vv50109Incompletely_characterized_transport_systems
VIT_04s0023g02290	1.78633	5.11767	S-adenosyl-L-methionine:salicylic acid carboxyl methyltransferase	SAMTBSCMT	vv10360Phenylalanine_metabolism
VIT_11s0016g05280	-2.38867	-2.51242	Peroxidase	E1_11_1_7	vv10360Phenylalanine_metabolism	vv10680Methane_metabolism
VIT_11s0016g05320	-1.27544	-2.12172	Peroxidase	E1_11_1_7	vv10360Phenylalanine_metabolism	vv10680Methane_metabolism
VIT_13s0067g02360	1.70497	2.83984	Peroxidase, class III	E1_11_1_7	vv10360Phenylalanine_metabolism	vv10680Methane_metabolism
VIT_18s0001g06850	-2.41629	-1.51237	Peroxidase GvPx2b class III	E1_11_1_7	vv10360Phenylalanine_metabolism	vv10680Methane_metabolism
VIT_00s0391g00070	1.23832	1.57021	3-deoxy-D-arabino-heptulosonate 7-phosphate synthase	E2_5_1_54	vv10400Phenylalanine_tyrosine_and_tryptophan_biosynthesis
VIT_05s0077g00280	1.09696	1.41848	Beta-amylase	E3_2_1_2	vv10500Starch_and_sucrose_metabolism
VIT_18s0001g12840	1.32522	2.50208	ADP-glucose pyrophosphorylase large subunit CagpL2	E2_7_7_27	vv10500Starch_and_sucrose_metabolism
VIT_15s0046g01450	1.4777	1.75552	Alpha-L-fucosidase	E3_2_1_51	vv10511N-Glycan_degradation
VIT_03s0038g03400	2.7036	4.45177	Endochitinase 1, basic	E3_2_1_14	vv10530Aminosugars_metabolism
VIT_05s0094g00340	1.84606	5.45104	Chitinase class IV	E3_2_1_14	vv10530Aminosugars_metabolism
VIT_14s0081g00020	1.51787	5.54602	Pathogenesis-related protein-4 (Chitinase )	E3_2_1_14	vv10530Aminosugars_metabolism
VIT_14s0081g00030	1.67246	5.49675	Pathogenesis-related protein-4 (Chitinase )	E3_2_1_14	vv10530Aminosugars_metabolism
VIT_17s0000g01070	1.08166	1.05556	Monoglyceride lipase	E3_1_1_23	vv10561Glycerolipid_metabolism
VIT_01s0011g05200	-1.15007	-1.51586	Phosphoethanolamine N-methyltransferase 1	E2_1_1_103	vv10564Glycerophospholipid_metabolism
VIT_06s0061g01110	1.84543	1.25697	Lecithine cholesterol acyltransferase	E2_3_1_43	vv10564Glycerophospholipid_metabolism
VIT_06s0004g01510	1.78919	3.56249	Lipoxygenase (LOX2)	E1_13_11_12	vv10592alpha-Linolenic_acid_metabolism
VIT_17s0000g02700	1.38095	1.23975	Alpha-dioxygenase 2	K10529	vv10592alpha-Linolenic_acid_metabolism
VIT_09s0002g06420	2.40023	3.76417	Lactoylglutathione lyase	E4_4_1_5	vv10620Pyruvate_metabolism
VIT_09s0002g06430	2.82375	1.68586	Lactoylglutathione lyase	E4_4_1_5	vv10620Pyruvate_metabolism
VIT_02s0012g00760	1.21132	1.38981	Haloacid dehalogenase hydrolase	E3_1_3_18	vv10630Glyoxylate_and_dicarboxylate_metabolism
VIT_06s0004g05020	1.15242	2.08921	Haloacid dehalogenase hydrolase	E3_1_3_18	vv10630Glyoxylate_and_dicarboxylate_metabolism
VIT_07s0005g02420	-1.11689	-1.85165	Haloacid dehalogenase hydrolase	E3_1_3_18	vv10630Glyoxylate_and_dicarboxylate_metabolism
VIT_07s0129g00300	-1.08231	-1.29497	formamidase, putative / formamide amidohydrolase, putative	E3_5_1_49	vv10630Glyoxylate_and_dicarboxylate_metabolism	vv10910Nitrogen_metabolism
VIT_07s0129g00310	-1.00869	-1.32084	Formamidase	E3_5_1_49	vv10630Glyoxylate_and_dicarboxylate_metabolism	vv10910Nitrogen_metabolism
VIT_07s0129g00320	-1.23801	-1.56998	formamidase, putative / formamide amidohydrolase, putative	E3_5_1_49	vv10630Glyoxylate_and_dicarboxylate_metabolism	vv10910Nitrogen_metabolism
VIT_11s0016g02380	-1.06631	-1.54482	1-aminocyclopropane-1-carboxylate oxidase 2	E1_14_17_4	vv10640Propanoate_metabolism	vv30008Ethylene_signaling
VIT_10s0116g00530	-1.05343	-1.69278	Thiazole biosynthetic enzyme, chloroplast (ARA6)	E2_5_1_3	vv10730Thiamine_metabolism
VIT_08s0058g00410	1.54594	1.20313	ferritin 1 (FER1)	E1_16_3_1	vv10860Porphyrin_and_chlorophyll_metabolism
VIT_19s0014g04900	-1.86193	-2.12493	(-)-germacrene D synthase	E4_2_3_22	vv10900Terpenoid_biosynthesis
VIT_17s0000g05580	1.58325	3.63463	Isopiperitenol dehydrogenase	E1_1_1_223	vv10902Monoterpenoid_biosynthesis
VIT_10s0116g00410	2.92189	1.84133	Gibberellin 2-beta-dioxygenase 7	E1_14_11_13	vv10904Diterpenoid_biosynthesis
VIT_11s0016g04810	-1.00628	-1.48486	BAS1 (PHYB activation tagged suppressor 1)	CYP734A1	vv10905Brassinosteroid_biosynthesis
VIT_02s0025g00240	3.79655	4.36645	Beta-carotene hydroxylase	K02294	vv10906Carotenoid_biosynthesis
VIT_03s0063g00380	2.07732	3.51352	ABA 8'-hydroxylase CYP707A1	E1_14_13_93	vv10906Carotenoid_biosynthesis	vv11013ABA_biosynthesis	vv30001ABA_signaling
VIT_19s0093g00550	5.01043	6.3026	9-cis-epoxycarotenoid dioxygenase 2	E1_13_11_51	vv10906Carotenoid_biosynthesis	vv11013ABA_biosynthesis	vv30001ABA_signaling
VIT_00s0324g00070	1.55087	3.02684	Cis-zeatin O-beta-D-glucosyltransferase	E2_4_1_215	vv10908Zeatin_biosynthesis
VIT_14s0006g02970	1.72795	2.47354	CYP735A1	CYP735A1	vv10908Zeatin_biosynthesis
VIT_14s0066g01210	1.73198	1.4381	Carbonic anhydrase, chloroplast precursor	E4_2_1_1	vv10910Nitrogen_metabolism	vv50124Porters_cat_30_to_64
VIT_01s0137g00510	-1.2503	-1.92624	CYP71B10	CYP71B10	vv10940Phenylpropanoid_biosynthesis
VIT_03s0180g00260	1.02366	1.10227	Cinnamyl alcohol dehydrogenase	E1_1_1_195	vv10940Phenylpropanoid_biosynthesis
VIT_07s0031g00350	1.49802	1.79042	Caffeoyl-CoA O-methyltransferase 1	E2_1_1_104	vv10940Phenylpropanoid_biosynthesis
VIT_11s0037g00440	1.40666	2.97858	Hydroxycinnamoyl-CoA shikimate/quinate hydroxycinnamoyltransferase	E2_3_1_133	vv10940Phenylpropanoid_biosynthesis
VIT_16s0050g00390	1.55649	1.3764	4-coumarate-CoA ligase	E6_2_1_12	vv10940Phenylpropanoid_biosynthesis	vv50104Group_translocators
VIT_14s0066g00400	1.62134	2.32537	Chalcone isomerase	E5_5_1_6	vv10941Flavonoid_biosynthesis
VIT_18s0001g11430	-1.01501	-1.64857	flavonoid 3-monooxygenase	E1_14_13_21	vv10941Flavonoid_biosynthesis
VIT_10s0003g00470	2.21108	4.63916	Isoflavone methyltransferase/ Orcinol O-methyltransferase 1 oomt1	E2_1_1_46	vv10943Isoflavonoid_biosynthesis
VIT_15s0048g01000	1.61585	2.62808	2'-hydroxy isoflavone/dihydroflavonol reductase	E1_3_1_45	vv10943Isoflavonoid_biosynthesis
VIT_13s0084g00240	2.05681	2.34252	Steroid sulfotransferase	E2_8_2_15	vv11000Single_reactions
VIT_15s0046g00490	1.10022	1.41324	Wax synthase	E2_3_1_75	vv11000Single_reactions
VIT_15s0046g00520	1.35758	1.72432	Wax synthase	E2_3_1_75	vv11000Single_reactions
VIT_15s0046g00590	1.70551	2.01963	Wax synthase	E2_3_1_75	vv11000Single_reactions
VIT_15s0046g00660	1.00565	1.05567	Wax synthase	E2_3_1_75	vv11000Single_reactions
VIT_06s0004g07230	1.26322	2.82368	Indole-3-acetate beta-glucosyltransferase	E2_4_1_121	vv11002Auxin_biosynthesis
VIT_17s0000g02680	-1.17844	-1.58767	ABA glucosidase	ABAGLC	vv11013ABA_biosynthesis
VIT_13s0064g00190	-1.12655	-1.48441	RNA polymerase sigma subunit SigD	SIGD	vv23020RNA_polymerase	vv60057Sigma70-like
VIT_05s0020g03330	1.89263	1.85564	Heat shock protein 70	K03283	vv23040Spliceosome	vv24141Protein_processing_in_endoplasmic_reticulum	vv50101Channels_and_pores
VIT_11s0037g00510	1.36447	1.5342	Heat shock protein 70	K03283	vv23040Spliceosome	vv24141Protein_processing_in_endoplasmic_reticulum	vv50101Channels_and_pores
VIT_01s0010g00020	1.92638	3.75442	DNA-3-methyladenine glycosidase I	K01246	vv23410Base_excision_repair
VIT_03s0063g00580	1.44673	2.51768	Rad54	K10875	vv23440Homologous_recombination	vv60058SNF2
VIT_06s0004g01130	1.46936	2.05192	Seven in absentia SINA2	K04506	vv24120Ubiquitin_mediated_proteolysis
VIT_13s0019g01840	-1.38011	-2.28909	Cell division cycle 20-like protein 1	K03364	vv24120Ubiquitin_mediated_proteolysis	vv44110Cell_cycle
VIT_06s0004g05770	1.77664	1.71476	Heat shock protein 17.6 kDa class I	K13993	vv24141Protein_processing_in_endoplasmic_reticulum
VIT_01s0011g05610	1.03793	1.00557	Caleosin	CALEOSIN	vv30001ABA_signaling
VIT_02s0012g01270	-1.21797	-2.50647	Abscisic acid receptor PYL1 RCAR12	RCAR12	vv30001ABA_signaling
VIT_02s0236g00130	1.13029	1.8108	SNF1-related protein kinase SRK2F	SRK2H	vv30001ABA_signaling
VIT_05s0049g02240	3.9869	4.67508	AWPM-19	AWPM19	vv30001ABA_signaling
VIT_06s0004g05460	4.16196	3.43117	Protein phosphatase 2C DBP	DBPPP2C_6	vv30001ABA_signaling	vv60024DBP
VIT_08s0058g00470	-3.3709	-3.07289	Abscisic acid receptor PYL4 RCAR10	RCAR10	vv30001ABA_signaling
VIT_11s0016g03180	3.04069	2.37063	ABI1 (ABA insensitive 1)	ABI1	vv30001ABA_signaling	vv34020Calcium_signaling_pathway
VIT_13s0019g02200	2.29021	2.41234	Protein phosphatase 2CA AHG3 PP2CA	AHG3	vv30001ABA_signaling
VIT_17s0000g01080	1.11936	1.66776	HVA22E (HVA22-like protein E)	HVA22E	vv30001ABA_signaling
VIT_18s0001g06430	-2.75762	-1.83705	Homeobox-leucine zipper protein ATHB-6	ATHB6_2	vv30001ABA_signaling	vv60034HB
VIT_18s0001g10450	1.64484	2.37969	ABA-responsive element-binding protein 2 (AREB2), VvbZIP45	AREB/ABF2, VvbZIP45	vv30001ABA_signaling	vv60012BZIP
VIT_00s1355g00020	5.47511	7.1229	Expansin-like B1	EXPB1	vv30003Auxin_signaling
VIT_00s1455g00010	5.33931	8.80362	Expansin beta 1 precursor	EXPB1	vv30003Auxin_signaling
VIT_04s0008g00220	1.58367	1.47979	IAA6	IAA6	vv30003Auxin_signaling	vv60008AUXIAA
VIT_06s0004g04860	1.31303	1.85581	Alpha-expansin 6 precursor	EXPA6	vv30003Auxin_signaling
VIT_07s0005g00090	-2.53058	-3.38809	Auxin-responsive GH3	GH3	vv30003Auxin_signaling
VIT_09s0002g05150	1.63513	1.28588	IAA19	IAA19_1	vv30003Auxin_signaling	vv60008AUXIAA
VIT_18s0001g01130	1.13964	2.65125	Alpha-expansin 1 precursor	EXPA1	vv30003Auxin_signaling
VIT_10s0003g01790	1.31241	1.04079	BES1/BZR1 homolog protein 4	BES1_1	vv30005Brassinosteroids_signaling	vv60010BES1
VIT_11s0016g03170	2.73212	1.22068	Arabidopsis histidine phosphotransfer AHP4	AHP4	vv30007Cytokinin_signaling
VIT_04s0008g03400	1.18807	1.58359	DREB sub A-4 of ERF/AP2 transcription factor	VvERF035	vv30008Ethylene_signaling	vv60003AP2_EREBP
VIT_05s0029g00140	1.66642	1.44473	Ethylene-responsive transcription factor ERF062	VvERF005	vv30008Ethylene_signaling	vv60003AP2_EREBP
VIT_05s0049g00510	1.83198	2.87004	Ethylene response factor ERF1	VvERF111	vv30008Ethylene_signaling	vv30011Jasmonate_signaling	vv60003AP2_EREBP
VIT_06s0004g06950	-2.82832	-3.29201	N-acetyltransferase hookless1 HLS1	HLS1_3	vv30008Ethylene_signaling	vv50004Auxin_transport	vv60082GNAT
VIT_07s0005g00870	2.14622	1.20483	Erg-1	ERG1	vv30008Ethylene_signaling	vv30011Jasmonate_signaling
VIT_10s0003g00140	1.29593	1.42644	Ethylene-responsive transcription factor 9	VvERF064	vv30008Ethylene_signaling	vv60003AP2_EREBP
VIT_10s0003g00590	1.67888	2.15047	Ethylene-responsive transcription factor ERF091	VvERF095	vv30008Ethylene_signaling	vv60003AP2_EREBP
VIT_16s0100g00400	1.32626	4.21497	Ethylene-responsive transcription factor ERF025	VvERF019	vv30008Ethylene_signaling	vv60003AP2_EREBP
VIT_17s0000g00200	1.34358	2.62571	Ethylene-responsive transcription factor ERF114	VvERF118	vv30008Ethylene_signaling	vv60003AP2_EREBP
VIT_18s0001g10150	1.38663	1.23196	Ethylene-responsive transcription factor ERF011	VvERF013	vv30008Ethylene_signaling	vv60017C2H2
VIT_03s0063g02620	-1.88863	-2.57312	Myb RAD (Transcription factor RAD)	RADIALIS_1	vv30009Flower_development	vv60045MYBrelated
VIT_03s0063g02670	-2.6798	-2.68078	Radialis-like protein 6	RADL6_1	vv30009Flower_development	vv60044MYB
VIT_04s0008g03240	-1.49871	-2.04758	BAM2 (big apical meristem 2)	BAM2	vv30009Flower_development
VIT_06s0080g00790	1.57049	1.50239	MYB divaricata	DIVARICATA_2	vv30009Flower_development	vv60044MYB
VIT_18s0001g11360	-1.08663	-1.21706	VRN1 (reduced vernalization response 1)	VRN1_5	vv30009Flower_development	vv60001ABI3VP1
VIT_18s0001g12610	-2.37757	-4.91027	Radialis-like protein 6	RADL6_2	vv30009Flower_development	vv60044MYB
VIT_18s0001g13460	-1.16782	-1.79841	MADS-box AP3 [Vitis labrusca x Vitis vinifera]	APETALA3_1	vv30009Flower_development	vv60042MADS
VIT_05s0020g04220	-2.38082	-1.14756	Calcium-transporting ATPase 13 ACA13	K01537	vv34020Calcium_signaling_pathway	vv50131Primary_active_transporter_cat_A2_to_A4
VIT_08s0040g01770	1.12497	1.21618	Cyclic nucleotide-gated ion channel 15	K05391_CNGC15	vv34626Plant-pathogen_interaction	vv50101Channels_and_pores
VIT_12s0028g02280	-1.28524	-1.56188	Calcium-dependent protein kinase 13 CPK13	CPK13	vv34626Plant-pathogen_interaction
VIT_13s0084g00560	-1.64361	-1.76243	CF2	K13468	vv34626Plant-pathogen_interaction
VIT_13s0084g00570	-2.82345	-2.45621	CF2	K13468	vv34626Plant-pathogen_interaction
VIT_16s0050g00180	2.70174	2.18199	HcrVf1 protein	K13466	vv34626Plant-pathogen_interaction
VIT_19s0014g03700	1.06664	1.28208	Cyclic nucleotide-regulated ion channel 4	K05391_CNGC4	vv34626Plant-pathogen_interaction	vv50101Channels_and_pores
VIT_19s0014g05180	-1.28483	-1.56292	RPS2 (resistant to p. syringae 2)	K13459	vv34626Plant-pathogen_interaction
VIT_15s0024g01760	-1.49575	-1.78611	R protein L6	K13477	vv34627R_proteins_from_Plant-pathogen_interaction
VIT_00s0322g00030	1.52823	1.02496	Alpha-6-galactosyltransferase	E2_4_2_39	vv40006Cell_wall
VIT_00s0386g00050	1.01926	1.31225	Xyloglucan endotransglucosylase/hydrolase precursor	E2_4_1_207	vv40006Cell_wall
VIT_01s0127g00870	-1.35851	-3.10863	Polygalacturonase JP630	E3_2_1_15	vv40006Cell_wall
VIT_05s0049g00040	1.62216	3.10544	Cellulose synthase CSLG2	E2_4_1_12_CSLG2	vv40006Cell_wall
VIT_05s0049g00050	1.35284	2.96909	Cellulose synthase CSLG2	E2_4_1_12_CSLG3	vv40006Cell_wall
VIT_05s0051g00590	1.07892	7.06175	Pectate lyase	E4_2_2_2	vv40006Cell_wall
VIT_10s0116g00590	-1.29095	-2.15141	Pectinesterase family	E3_1_1_11	vv40006Cell_wall
VIT_11s0016g00300	-1.52859	-3.40471	Pectinesterase family	E3_1_1_11	vv40006Cell_wall
VIT_16s0022g00870	-2.1923	-5.64729	Invertase/pectin methylesterase inhibitor	PMEI	vv40006Cell_wall
VIT_16s0050g01110	1.22485	1.31498	Polygalacturonase GH28	E3_2_1_15	vv40006Cell_wall
VIT_04s0008g01870	-1.23348	-3.88153	MYB PAL2	VvMYBPAL2	vv44110Cell_cycle	vv60044MYB
VIT_18s0001g08300	2.11134	3.10521	Tubulin alpha-6 chain	K07374	vv44145Phagosome	vv44810Regulation_of_actin_cytoskeleton
VIT_06s0004g02360	-1.50227	-1.53201	Myosin-related	MYOSINR	vv44810Regulation_of_actin_cytoskeleton
VIT_09s0002g04280	1.28835	1.86143	Dynein light chain LC6, flagellar outer arm	K10418	vv44810Regulation_of_actin_cytoskeleton
VIT_17s0000g02420	-2.15431	-2.56254	Auxin transport protein (PIN3)	PIN3	vv50004Auxin_transport	vv50125Porters_cat_66_to_94
VIT_18s0001g03540	1.52871	2.52026	Auxin transporter protein 4	AUX1	vv50004Auxin_transport	vv50123Porters_cat_18_to_29
VIT_03s0038g03920	-1.0067	-1.49392	Glutamate receptor 2 GLUR2	GLUR2	vv50101Channels_and_pores
VIT_06s0004g04700	1.10375	1.10932	Outer envelope protein 16	OEP16	vv50101Channels_and_pores
VIT_06s0061g00730	-1.36181	-3.65383	Aquaporin GAMMA-TIP3/TIP1;3	TIP1_3	vv50101Channels_and_pores
VIT_08s0040g01890	1.31769	1.02983	Aquaporin PIP2;4	PIP2_4	vv50101Channels_and_pores
VIT_15s0107g00270	-1.11403	-2.04346	Mechanosensitive ion channel	MSCSREL	vv50101Channels_and_pores
VIT_05s0029g01540	-1.06244	-1.04632	Ankyrin repeat	K10380	vv50108Accessory_factors_involved_in_transport
VIT_12s0059g00110	1.11115	1.01387	Ankyrin repeat	K10380	vv50108Accessory_factors_involved_in_transport
VIT_14s0108g00560	-1.01313	-2.01976	Ankyrin repeat	ANKYRIN_CCCH	vv50108Accessory_factors_involved_in_transport	vv60018C3H
VIT_00s0934g00010	1.31351	1.7335	RARE-cold-inducible 2B	RCI2B	vv50109Incompletely_characterized_transport_systems
VIT_07s0005g00140	5.33316	2.42818	Peripheral-type benzodiazepine receptor	K05770	vv50109Incompletely_characterized_transport_systems
VIT_12s0057g00200	-1.18019	-1.3336	Vesicle-associated membrane protein	VAMPREL	vv50109Incompletely_characterized_transport_systems
VIT_13s0019g03650	3.30703	2.88361	RARE-cold-inducible 2A	RCI2A	vv50109Incompletely_characterized_transport_systems
VIT_14s0060g00280	1.55202	2.04866	RARE-cold-inducible 2B	RCI2B	vv50109Incompletely_characterized_transport_systems
VIT_15s0021g02790	1.20706	1.76661	ATELC/ELC	VPS23	vv50111Tethering_factors
VIT_08s0007g01810	1.19842	1.70932	ANTR2 (anion transporter 2	ANTR2	vv50121Porters_cat_1_to_6
VIT_14s0030g00210	-1.04917	-1.26226	Sugar transporter ERD6-like 5	ERD6L5	vv50121Porters_cat_1_to_6
VIT_19s0014g04790	1.75327	2.03131	Organic cation/carnitine transporter4	VVOCT4	vv50121Porters_cat_1_to_6
VIT_04s0023g01720	1.03366	1.12364	SEC14 cytosolic factor, putative	SEC14	vv50122Porters_cat_7_to_17
VIT_06s0004g03530	-1.47038	-2.90921	Nitrate excretion transporter1	NAXT1	vv50122Porters_cat_7_to_17
VIT_12s0059g01240	1.10353	1.38419	Nitrate transporter (NTP3)	NTP3	vv50122Porters_cat_7_to_17
VIT_13s0067g02340	-1.24139	-1.43999	Proton-dependent oligopeptide transport (POT) family protein	POT	vv50122Porters_cat_7_to_17
VIT_14s0066g01640	-1.33182	-2.05625	Nodulin MtN21 family	MTN21	vv50122Porters_cat_7_to_17
VIT_14s0066g01650	-1.19496	-1.42593	Nodulin MtN21 family	MTN21	vv50122Porters_cat_7_to_17
VIT_18s0001g03180	3.36204	3.31834	Nodulin MtN21 family	MTN21	vv50122Porters_cat_7_to_17
VIT_18s0041g00550	-1.82176	-2.51927	Proton-dependent oligopeptide transport (POT) family protein	POT	vv50122Porters_cat_7_to_17
VIT_01s0011g03180	-1.53214	-1.48041	Lysine and histidine specific transporter	LHTREL	vv50123Porters_cat_18_to_29
VIT_06s0061g00570	-1.25307	-1.74345	Amino acid permease	AAPREL	vv50123Porters_cat_18_to_29
VIT_07s0031g02340	1.20381	1.26655	Amino acid permease 2	AAP2	vv50123Porters_cat_18_to_29
VIT_19s0015g01290	1.28262	2.86281	Amino acid permease 7	AAP7	vv50123Porters_cat_18_to_29
VIT_19s0015g01300	1.17612	1.84328	Amino acid permease 7	AAP7	vv50123Porters_cat_18_to_29
VIT_00s0187g00130	1.1186	2.18008	Tonoplast dicarboxylate transporter	SDAT	vv50124Porters_cat_30_to_64
VIT_00s2188g00010	1.14883	2.15202	Tonoplast dicarboxylate transporter	SDAT	vv50124Porters_cat_30_to_64
VIT_01s0011g04980	-2.5652	-2.15819	Sulfate transporter 91	AST91	vv50124Porters_cat_30_to_64
VIT_05s0020g03970	2.36815	2.0638	Sulfate transporter 3.1 (AST12) (AtST1)	SULTR3_1	vv50124Porters_cat_30_to_64
VIT_07s0151g00340	1.77188	2.71055	Sulfate transporter 3.1 (AST12) (AtST1)	SULTR3_1	vv50124Porters_cat_30_to_64
VIT_07s0151g00410	2.11343	2.48733	Sulfate transporter 3.1 (AST12) (AtST1)	SULTR3_1	vv50124Porters_cat_30_to_64
VIT_11s0103g00010	-1.00173	-1.65921	Potassium-sodium symporter HKT2	HKT1	vv50124Porters_cat_30_to_64
VIT_14s0068g02190	1.36175	2.19114	Chloride channel protein B	K05393_CLCB	vv50124Porters_cat_30_to_64
VIT_00s0477g00030	1.0285	1.17978	MATE efflux family protein ripening responsive	MATE	vv50125Porters_cat_66_to_94
VIT_01s0011g02520	-1.26563	-1.71394	EXS family protein / ERD1/XPR1/SYG1	ERD1	vv50125Porters_cat_66_to_94
VIT_02s0025g05110	2.30494	1.9994	MATE efflux family protein	MATE	vv50125Porters_cat_66_to_94
VIT_16s0039g00720	1.29232	1.30311	Folate-biopterin transporter	FBT	vv50125Porters_cat_66_to_94
VIT_17s0000g01930	1.64062	5.01372	Potassium transporter 2	KUP2	vv50125Porters_cat_66_to_94
VIT_18s0001g06790	1.74075	2.71024	Ripening regulated protein DDTFR18	DDTFR18	vv50125Porters_cat_66_to_94
VIT_18s0001g08200	3.38436	4.0215	MATE efflux family protein ZF14	ZF14	vv50125Porters_cat_66_to_94
VIT_18s0001g04800	3.00134	4.15156	Hyperosmotically inducible periplasmic protein	K04065	vv50131Primary_active_transporter_cat_A2_to_A4
VIT_01s0011g04820	2.00054	1.46041	Molecular chaperone DnaJ	K03686	vv50132Primary_active_transporter_cat_A5_to_A8
VIT_03s0038g02110	2.05737	3.62315	Co-chaperone-curved DNA binding protein A	K05516	vv50132Primary_active_transporter_cat_A5_to_A8
VIT_19s0177g00270	-1.57491	-1.27811	Molecular chaperone DnaJ	K03686	vv50132Primary_active_transporter_cat_A5_to_A8
VIT_00s0216g00060	3.96263	4.34856	Nuclear transport factor 2 (NTF2)	NTF2	vv50133Primary_active_transporter_cat_A9_to_A18
VIT_01s0011g00410	2.24344	2.48549	Nuclear transport factor 2 (NTF2)	NTF2	vv50133Primary_active_transporter_cat_A9_to_A18
VIT_14s0108g00590	2.73848	1.95787	FtsH protease	K03798	vv50133Primary_active_transporter_cat_A9_to_A18
VIT_01s0011g02730	2.974	4.11377	ABC transporter G member 3	K05682	vv52010ABC_transporters
VIT_05s0020g00890	-1.26302	-1.12193	P-glycoprotein 11	PGP11	vv52010ABC_transporters
VIT_18s0072g01220	3.35435	2.63355	ABC transporter G member 3	K05682	vv52010ABC_transporters
VIT_01s0011g03720	3.22254	2.62253	BEE1 (BR Enhanced expression 1)	BEE1_1	vv60011BHLH
VIT_17s0000g00430	1.50517	3.37345	Basic helix-loop-helix (bHLH) family	BHLHDOM_62	vv60011BHLH
VIT_17s0000g06930	1.20353	1.99391	Unfertilized embryo sac 10 UNE10	UNE10_3	vv60011BHLH
VIT_06s0080g00360	1.21459	1.21969	VvbZIP20	VvbZIP20	vv60012BZIP
VIT_15s0046g01440	1.23964	1.43658	VvbZIP40	VvbZIP40	vv60012BZIP
VIT_18s0001g08710	1.08467	1.72439	VvbZIP44	VvbZIP44	vv60012BZIP
VIT_06s0061g00760	1.31473	1.44455	Zinc finger (C2H2 type) family	C2H2FAM_40	vv60017C2H2
VIT_13s0019g05170	1.40345	2.40197	Zinc finger (C2H2 type) family	C2H2FAM_20	vv60017C2H2
VIT_07s0031g01460	-1.307	-3.05559	Nuclear transcription factor Y subunit B-3	NFYB3_4	vv60021CCAAT
VIT_08s0007g08250	1.16335	1.04987	Nuclear transcription factor Y subunit A-9	NFYA9	vv60021CCAAT
VIT_16s0050g00950	1.23173	1.02304	Scarecrow-like transcription factor 8 (SCL8)	SCL8	vv60032GRAS
VIT_16s0098g01080	-1.71088	-2.25525	Growth-regulating factor 7	GRF7	vv60033GRF
VIT_02s0025g02590	2.92187	2.37535	Homeobox-leucine zipper protein ATHB-12	VVHB12_2	vv60034HB
VIT_04s0023g01330	3.28501	3.60751	Homeobox protein 5	VVHB5	vv60034HB
VIT_15s0048g02870	3.45942	4.57129	Homeobox-leucine zipper protein HB-7	VVHB7_2	vv60034HB
VIT_00s0203g00070	2.10795	2.91185	Myb domain protein 143	VvMYB143	vv60044MYB
VIT_01s0011g03730	1.21342	1.59691	(myb domain protein 163	VvMYB163	vv60044MYB
VIT_01s0026g01910	-1.01585	-1.15383	Myb domain protein 192	VvMYB192	vv60044MYB
VIT_04s0008g01800	1.31938	1.37647	Myb domain protein PA7	VvMYBPA7	vv60044MYB
VIT_05s0077g00500	2.74035	4.233	Myb domain protein 108A	VvMYB108A	vv60044MYB
VIT_17s0000g06190	1.7369	1.73368	Myb domain protein 30A	VvMYB30A	vv60044MYB
VIT_18s0001g09850	1.41182	1.45515	Myb domain protein 174	VvMYB174	vv60044MYB
VIT_19s0014g03820	2.74185	1.43616	Myb domain protein 145	VvMYB145	vv60044MYB
VIT_01s0026g02710	1.86622	3.16936	NAC domain-containing protein 26	VvNAC26	vv60046NAC
VIT_14s0108g01070	2.19584	2.37258	NAC domain containing protein 11	VvNAC11	vv60046NAC
VIT_19s0014g03290	2.42993	3.2512	NAC domain containing protein 17	VvNAC17	vv60046NAC
VIT_19s0014g02350	-1.41173	-1.57232	Squamosa promoter-binding protein 4 (SPL4)	SPL4_1	vv60055SBP
VIT_01s0026g02460	-1.05479	-1.08192	Zinc finger homeobox 30	ZFHB30	vv60068Zf-HD
VIT_00s0203g00210	1.25371	2.01354	Zinc finger (B-box type)	ZFBBOX_12	vv60073Orphans_zf-b_box
VIT_00s0347g00030	1.30579	1.58568	Zinc finger (B-box type)	ZFBBOX_1	vv60073Orphans_zf-b_box
VIT_12s0059g02510	1.89489	3.22712	Zinc finger (B-box type)	ZFBBOX_6	vv60073Orphans_zf-b_box
VIT_05s0094g00470	-1.609	-1.90583	Zinc finger (C3HC4-type ring finger)	ZFC3HC4_201	vv60078Other_zf-C3HC4
VIT_08s0058g01270	1.55773	2.43924	Zinc finger (C3HC4-type ring finger)	ZFC3HC4_94	vv60078Other_zf-C3HC4
VIT_09s0018g01220	-2.22501	-1.46173	Zinc finger (C3HC4-type ring finger)	ZFC3HC4_18	vv60078Other_zf-C3HC4
VIT_12s0057g01330	1.77746	1.55429	Zinc finger (C3HC4-type ring finger)	ZFC3HC4_219	vv60078Other_zf-C3HC4
VIT_19s0090g00400	-1.60132	-1.23647	Zinc finger (C3HC4-type ring finger)	ZFC3HC4_83	vv60078Other_zf-C3HC4
VIT_00s0187g00120	1.92276	4.14862	Cystatin
VIT_00s0194g00180	2.98425	4.84446	Unknown protein
VIT_00s0291g00020	1.39148	1.14407	Unknown protein
VIT_00s0323g00100	1.54753	2.53653	Vacuolar processing enzyme beta
VIT_00s0324g00080	1.41199	2.4756	UDP-glucoronosyl and UDP-glucosyl transferase
VIT_00s0391g00010	1.26284	1.76621	Pentatricopeptide (PPR) repeat-containing
VIT_00s0429g00040	1.14722	1.30566	Aspartic proteinase nepenthesin-1 precursor	E3_4_23_12
VIT_00s1206g00010	1.12195	1.37165	Aspartic proteinase nepenthesin-1 precursor	E3_4_23_12
VIT_00s1251g00010	1.43481	1.93335	UDP-glucosyl transferase 85A2
VIT_00s1321g00010	1.08524	1.62341	Unknown
VIT_01s0010g01390	-1.19531	-2.64154	Phototropic-responsive NPH3
VIT_01s0010g03680	1.3484	1.22528	Unknown protein
VIT_01s0011g04620	1.17423	1.69148	Unknown protein
VIT_01s0011g05170	2.62741	3.34565	Major Latex Protein Family
VIT_01s0011g05190	2.04411	3.26898	Bet v I allergen
VIT_01s0026g00190	1.05527	2.02155	Armadillo/beta-catenin repeat
VIT_01s0137g00410	-1.31444	-1.65922	CYP86A2
VIT_01s0137g00780	2.24665	2.98986	Unknown protein	Xerico-like
VIT_01s0150g00510	-1.10878	-1.08507	Protein phosphatase 2C	E3_1_3_16
VIT_02s0012g01350	-1.33982	-3.18135	No hit
VIT_02s0012g01370	-1.31325	-1.22455	No hit
VIT_02s0025g00140	1.26371	1.54901	Ring-H2 zinc finger protein RHA1b
VIT_02s0025g00500	2.85274	6.28769	Unknown protein
VIT_02s0025g02190	-1.39069	-2.06769	Short-chain dehydrogenase/reductase
VIT_02s0025g04330	2.59463	5.95221	Thaumatin VVTL1 [Vitis vinifera]
VIT_02s0025g04340	2.14671	3.81952	Osmotin
VIT_02s0087g00380	-1.76916	-1.79378	No hit
VIT_03s0017g01410	1.00726	1.30186	No hit
VIT_03s0038g01380	2.3384	3.0589	Calcium-binding EF hand
VIT_03s0038g01510	1.12531	1.51582	Unknown protein
VIT_03s0063g00860	-1.06203	-2.03413	Serine carboxypeptidase
VIT_03s0063g01430	-1.24423	-1.12134	Pentatricopeptide (PPR) repeat
VIT_03s0063g01790	2.39592	3.5888	Transducin protein
VIT_03s0063g01870	1.09462	1.55074	Cold acclimation protein WCOR413 protein beta form
VIT_03s0063g01930	-1.34793	-1.05834	DC1 domain-containing protein
VIT_03s0063g02340	-1.3521	-1.9508	Dehydration-responsive protein (RD22)	RD22
VIT_03s0063g02360	-2.2741	-2.40338	Epicotyl-specific tissue protein
VIT_03s0063g02380	-1.96863	-2.45092	Specific tissue protein 2
VIT_03s0088g00320	1.06644	1.04624	Peptidase M50
VIT_03s0091g00410	-1.05873	-2.12959	Unknown protein
VIT_03s0091g00420	1.47207	1.701	No hit
VIT_03s0091g01120	-1.44612	-1.11098	Meprin and TRAF homology domain-containing protein
VIT_04s0008g01100	-1.27114	-1.03418	CYP706A12
VIT_04s0008g01120	2.07327	1.10585	Glutaredoxin
VIT_04s0008g01280	1.92475	1.79596	No hit
VIT_04s0008g02050	1.19721	1.11494	Hydrolase, alpha/beta fold
VIT_04s0008g02070	2.23863	1.81925	Avr9/Cf-9 induced kinase 1
VIT_04s0008g04160	-3.98178	-2.90145	Dehydration-responsive protein (RD22)	RD22
VIT_04s0008g05110	-1.22158	-1.77027	Unknown
VIT_04s0023g01800	2.47365	3.23389	Maf, septum formation protein	K06287
VIT_04s0023g01890	1.86817	1.54496	Unknown protein
VIT_04s0023g02480	6.93901	7.24032	Dehydrin 1b
VIT_04s0023g02840	-1.08145	-1.13462	Leucine-rich repeat disease resistance protein
VIT_04s0023g03550	1.9585	2.51803	Thaumatin
VIT_04s0044g00130	1.40799	3.11248	Unknown protein
VIT_04s0044g01230	6.39775	8.43314	Unknown
VIT_05s0020g00830	1.41296	1.5237	CBL-interacting protein kinase 1 (CIPK1)	CIPK1
VIT_05s0020g00840	5.18805	5.58473	No hit
VIT_05s0020g01310	1.48873	1.57017	SRG1 (senescence-related gene 1)
VIT_05s0020g02290	1.04835	2.1156	Endonuclease	E3_1_30_x
VIT_05s0020g03050	1.34865	1.52918	Unknown
VIT_05s0020g04010	1.25796	1.57593	Unknown protein
VIT_05s0020g04110	1.14479	2.80983	ELIP1 (early light-inducible protein)
VIT_05s0029g00480	1.35344	1.40579	Eceriferum 2 (CER2)
VIT_05s0049g00520	2.17329	2.87358	No hit
VIT_05s0049g00550	3.1938	3.31173	No hit
VIT_05s0049g00760	1.61258	1.60614	No hit
VIT_05s0049g01050	1.11217	1.60786	Unknown
VIT_05s0051g00680	1.44576	1.92834	Unknown protein
VIT_05s0062g01070	-1.43714	-1.93255	Receptor protein kinase
VIT_05s0077g00900	-1.14409	-1.48663	No hit
VIT_05s0077g01280	1.28223	3.67344	Glycosyl hydrolase family 3 beta xylosidase BXL1
VIT_05s0077g01670	-1.48356	-2.64266	Major cherry allergen Pru av 1.0202
VIT_05s0077g02260	-1.18168	-1.64703	Nodulin MtN3 family
VIT_05s0077g02330	-1.3617	-1.86227	Transducin protein
VIT_06s0004g00980	-1.18235	-1.16031	Dirigent protein pDIR9
VIT_06s0004g01750	1.17163	1.29928	Polygalacturonase inhibitor protein	PGIP
VIT_06s0004g04110	1.81055	2.99411	Unknown protein
VIT_06s0004g05650	1.3489	2.52207	Unknown protein
VIT_06s0004g05780	1.4264	1.02359	UDP-glucoronosyl and UDP-glucosyl transferase
VIT_06s0004g06850	1.62675	3.53578	MAPKKK14
VIT_06s0009g00370	1.38477	1.20579	U-box domain-containing protein
VIT_06s0009g03680	2.63035	2.43167	F-box family protein
VIT_06s0080g01060	1.01093	1.00279	Calcium-binding EF hand
VIT_07s0005g00660	1.30926	2.30228	Late embryogenis abundant protein 5
VIT_07s0005g01080	2.74836	3.70047	Unknown protein
VIT_07s0005g01980	2.33369	2.2397	Glycosyl transferase family 8 protein
VIT_07s0005g02490	4.90093	6.71274	CYP709B2
VIT_07s0031g01680	-1.19209	-3.05349	CYP86A1
VIT_07s0104g00350	3.30889	2.11411	Circadian clock coupling factor ZGT
VIT_07s0104g01130	1.78459	2.7934	No hit
VIT_07s0129g00510	1.61977	1.94121	Unknown
VIT_07s0129g01000	-1.15713	-1.85207	F-box family protein
VIT_07s0129g01070	-1.03974	-1.96031	Leucine-rich repeat protein kinase
VIT_07s0151g00800	1.12219	1.80394	Unknown
VIT_07s0191g00220	1.29508	1.0582	Unknown protein
VIT_07s0255g00110	1.47295	2.07637	WD40
VIT_08s0007g00810	2.25918	4.78239	Lectin receptor kinase 7
VIT_08s0007g00820	1.00302	1.40643	Proteinase inhibitor
VIT_08s0007g01490	-1.19658	-1.64066	Unknown protein
VIT_08s0007g02440	-1.50323	-2.19574	Aspartyl protease	E3_4_23_x
VIT_08s0007g02450	-3.29536	-1.9302	Aspartyl protease	E3_4_23_x
VIT_08s0007g02470	-1.08661	-2.06011	Aspartyl protease	E3_4_23_x
VIT_08s0007g03260	1.87729	1.95375	Unknown protein
VIT_08s0007g04000	3.93949	3.14829	Unknown protein
VIT_08s0007g05580	1.99381	2.78916	Embryo-abundant protein
VIT_08s0007g08030	1.2526	2.59553	No hit
VIT_08s0007g08280	2.64435	2.24746	Remorin
VIT_08s0040g00820	-1.17328	-1.56348	CYP94A1
VIT_08s0040g01290	2.07542	3.40341	F-box family protein
VIT_08s0040g01820	1.81585	3.33788	No hit
VIT_08s0040g02610	1.31184	2.43482	Unknown
VIT_08s0056g01240	1.029	1.48502	No hit
VIT_08s0056g01600	1.29206	1.23648	No hit
VIT_08s0058g01210	1.81077	1.59963	Non-specific lipid transfer protein LTP1	LTP1
VIT_08s0058g01260	1.8994	2.61143	No hit
VIT_09s0002g00450	-1.73381	-1.47094	Subtilase
VIT_09s0002g00630	1.8702	1.7927	No hit
VIT_09s0002g00640	1.44258	1.73782	Small heat stress protein class CIII
VIT_09s0002g02460	-1.43702	-1.94101	Phosphatase
VIT_09s0002g03690	1.28385	1.76244	Avr9/Cf-9 rapidly elicited protein 146
VIT_09s0002g04240	-1.60202	-2.03128	Membrane protein
VIT_09s0002g06400	1.35385	1.65285	No hit
VIT_09s0002g06770	1.20562	1.5903	Unknown protein
VIT_09s0002g06790	3.00226	2.40606	Small heat shock protein (HSP26.5-P) 26.5 kDa class I
VIT_09s0002g08540	1.86582	2.02393	Serine-rich protein
VIT_09s0054g00300	-1.71551	-1.70872	Disease resistance
VIT_09s0054g01750	3.16798	1.55245	Unknown protein
VIT_10s0003g00390	1.37895	1.86158	Glutaredoxin
VIT_10s0003g01020	3.03061	3.63409	Unknown protein
VIT_10s0003g01030	1.6357	2.7127	Unknown protein
VIT_10s0003g02910	-2.10346	-1.65981	FLS2 (flagellin-sensitive 2)
VIT_10s0003g04950	1.49668	2.51268	Esterase/lipase/thioesterase
VIT_10s0092g00590	-1.85309	-2.01095	Leucine-rich repeat family
VIT_10s0116g00170	-1.36918	-2.43742	S-locus lectin protein kinase
VIT_11s0016g02860	-1.61819	-2.76919	Nudix hydrolase 8
VIT_11s0016g03710	1.15975	1.21572	Abl interactor protein 1 (ABIL1)
VIT_11s0016g03800	-1.08688	-1.06126	No hit
VIT_11s0016g04270	-3.16106	-1.68564	Hydrolase, alpha/beta fold
VIT_11s0037g00320	-1.22643	-1.72078	Serine carboxypeptidase S10
VIT_11s0037g00470	1.92446	2.04078	No hit
VIT_11s0037g01210	1.43511	2.08576	Eceriferum 1 (CER1 protein) Sterol desaturase
VIT_11s0052g00160	-1.27753	-1.27962	ATP binding , related
VIT_11s0052g00240	-1.43666	-1.06912	Accelerated cell death 11 (ACD11)
VIT_11s0052g01140	-1.52378	-2.80335	Membrane protein
VIT_11s0065g00970	-1.37652	-1.2591	No hit
VIT_11s0118g00580	1.51539	2.02622	Unknown
VIT_11s0149g00060	1.11419	1.49555	Unknown
VIT_11s0149g00090	-1.13722	-1.15068	Clavata1 receptor kinase (CLV1)
VIT_12s0028g02440	1.24621	3.4181	Unknown protein
VIT_12s0028g03560	1.54717	2.07037	Unknown protein
VIT_12s0034g02570	-1.03393	-1.19747	Leucine Rich Repeat receptor-like kinase
VIT_12s0035g00050	-1.06024	-1.52975	No hit
VIT_12s0055g00470	-1.20551	-1.14974	Gag-pol polyprotein
VIT_12s0059g00030	-1.02157	-3.27852	Unknown protein
VIT_12s0059g00440	4.83593	4.15944	No hit
VIT_12s0059g00490	3.71046	3.60902	Unknown
VIT_12s0059g00670	1.22348	1.3239	NADP-dependent oxidoreductase	E1_6_5_5
VIT_12s0059g01640	1.66857	2.32224	Unknown protein
VIT_12s0134g00560	-1.24289	-1.91167	Unknown protein
VIT_13s0019g00740	-1.63363	-1.62679	Amino acid binding protein
VIT_13s0019g02020	1.10117	1.51726	Thaumatin
VIT_13s0019g02110	2.60744	2.27912	fringe-related protein	K05948
VIT_13s0019g02640	-2.52405	-2.74132	Subtilisin protease C1
VIT_13s0019g05400	-1.29882	-1.36561	RPG related protein 1 RR1
VIT_13s0067g00240	1.84629	2.73763	Binding
VIT_13s0067g02910	-1.77096	-2.78689	Non-specific lipid-transfer protein
VIT_13s0084g00820	-1.95049	-2.85563	Pepsin A
VIT_13s0156g00100	2.11091	3.6185	Unknown protein
VIT_14s0006g01580	4.79635	6.85959	Unknown protein
VIT_14s0006g01600	-1.28718	-1.16494	Unknown
VIT_14s0006g01930	1.84934	2.96968	Unknown protein
VIT_14s0030g01220	1.00005	1.4137	No hit
VIT_14s0030g01890	1.27804	2.2975	Unknown
VIT_14s0030g01950	1.29226	1.56574	Transferase
VIT_14s0060g00990	-1.2018	-1.49427	Unknown
VIT_14s0060g01980	1.87411	2.33874	Unknown protein
VIT_14s0060g02000	1.60376	4.96762	ATPP2-B14
VIT_14s0066g00600	1.21399	2.22221	Unknown protein
VIT_14s0068g00300	3.56281	3.12135	ABRC5
VIT_14s0068g01620	-1.51813	-2.08443	Pollen proteins Ole e I
VIT_14s0108g01060	1.2853	1.35717	Pentatricopeptide (PPR) repeat-containing protein
VIT_14s0171g00360	3.74602	4.52129	Unknown protein
VIT_15s0021g00940	1.25508	1.02997	Senescence-associated protein
VIT_15s0046g00360	1.03075	1.2451	Aspartyl protease	E3_4_23_x
VIT_15s0046g01810	1.62741	1.23615	S-locus lectin protein kinase
VIT_15s0046g03780	1.54218	2.10801	No hit
VIT_16s0022g01430	-1.18307	-3.15994	Phosphate-induced protein 1
VIT_16s0022g01640	-1.98589	-2.12238	Receptor serine/threonine kinase
VIT_16s0022g02200	-1.23002	-3.42392	Subtilase
VIT_16s0039g01910	-1.10456	-1.75427	Vegetative storage protein win4.5
VIT_16s0050g01880	1.38535	1.633	Receptor kinase homolog LRK10
VIT_16s0050g02100	-1.48684	-1.98146	Disease resistance
VIT_16s0050g02680	7.46906	7.05552	Protein phosphatase 2C	E3_1_3_16
VIT_16s0098g00890	-1.12968	-1.20835	Harpin-induced protein
VIT_16s0098g00990	1.64605	1.74548	No hit
VIT_16s0100g00570	1.00773	3.75368	Dehydration-responsive protein
VIT_17s0000g00010	1.53328	1.35547	MtN19
VIT_17s0000g00070	2.54717	2.97602	Unknown protein
VIT_17s0000g01120	-1.17718	-2.8943	Unknown protein
VIT_17s0000g01210	1.60739	1.79831	Unknown protein
VIT_17s0000g02600	-1.05561	-1.57129	Unknown protein
VIT_17s0000g03840	-1.49017	-1.13986	Agenet domain-containing protein
VIT_17s0000g04210	1.30144	1.12929	Oleosin OLE-5
VIT_17s0000g05470	2.04023	1.66262	Nodulin
VIT_17s0000g05570	1.40906	2.86965	Receptor protein kinase
VIT_17s0000g08080	3.98846	4.0048	Armadillo/beta-catenin repeat protein / U-box domain-containing protein	Armadillo-like
VIT_18s0001g00110	1.27454	2.14306	Unknown protein
VIT_18s0001g00840	1.20932	1.74432	Syringolide-induced protein 14-1-1
VIT_18s0001g01030	2.3858	2.4723	Protein disulfide isomerase	E5_3_4_1
VIT_18s0001g02750	1.17307	1.3245	Unknown protein
VIT_18s0001g03610	-1.3692	-2.79187	Auxin-independent growth promoter
VIT_18s0001g05020	-1.03992	-1.68432	Senescence-associated protein
VIT_18s0001g06070	-1.0801	-1.20838	Unknown protein
VIT_18s0001g07840	1.59111	1.37152	Unknown protein
VIT_18s0001g08490	1.38591	1.90185	Early-responsive to dehydration
VIT_18s0001g09290	1.57131	1.82692	Unknown protein
VIT_18s0001g10610	-1.09936	-1.07038	No hit
VIT_18s0001g11470	-1.39453	-1.84132	CyP82A3
VIT_18s0001g11490	-1.89665	-1.46344	CYP82C1p
VIT_18s0001g11930	1.95641	2.8611	Thaumatin SCUTL2
VIT_18s0001g12620	-1.47231	-1.19462	U-box domain-containing protein
VIT_18s0001g12710	1.64328	2.63075	No hit
VIT_18s0001g12860	2.3434	1.33191	Unknown protein
VIT_18s0001g15720	-1.55719	-1.89596	Leucine Rich Repeat receptor-like kinase
VIT_18s0076g00360	1.15123	1.63362	EMB1075 (embryo defective 1075) carboxy-lyase
VIT_18s0122g01480	-1.81443	-2.9318	CYP87A2
VIT_19s0014g01180	-1.43164	-1.99481	Pathogenesis-related
VIT_19s0014g03720	1.43188	2.15864	Unknown protein
VIT_19s0014g04720	-1.32306	-1.16077	Unknown protein
VIT_19s0014g04780	1.38185	1.42906	No hit
VIT_19s0090g01340	3.47929	3.21366	No hit
VIT_19s0090g01350	3.07037	2.64723	Aspartyl protease	E3_4_23_x
VIT_19s0090g01360	2.83582	2.80645	No hit
VIT_19s0090g01370	3.01073	4.12565	No hit
		LogFC44	Functional.annotation	briefname..EC.or.Kegg.ID	Network1	Network2	Network3	Network4	Network5	Network6	Network7	Network8
VIT_14s0030g00920		-1.80456	Alcohol dehydrogenase	E1_1_1_1	vv10010Glycolysis	vv10071Fatty_acid_metabolism	vv10350Tyrosine_metabolism
VIT_18s0072g00770		1.00904	fructose-1,6-bisphosphatase, cytosolic	E3_1_3_11	vv10010Glycolysis	vv10030Pentose_phosphate	vv10051Fructose_and_mannose_metabolism	vv10710Carbon_fixation
VIT_16s0022g01770		-1.00723	Phosphopyruvate hydratase.	E4_2_1_11	vv10010Glycolysis
VIT_15s0107g00130		-1.04543	Pyruvate kinase	E2_7_1_40	vv10010Glycolysis	vv10230Purine_metabolism	vv10620Pyruvate_metabolism	vv10710Carbon_fixation
VIT_14s0060g01700		-1.00917	fumarase	E4_2_1_2	vv10020Citrate_cycle	vv10720Reductive_carboxylate_cycle
VIT_15s0048g00370		-1.67983	Transketolase, chloroplast precursor	E2_2_1_1	vv10030Pentose_phosphate	vv10710Carbon_fixation
VIT_06s0004g07280		1.19496	UDP-glucuronosyl/UDP-glucosyltransferase	E2_4_1_17	vv10040Pentose_glucuronate_interconversion	vv10500Starch_and_sucrose_metabolism
VIT_18s0001g12830		1.00287	1,4-beta-mannan endohydrolase	E3_2_1_78	vv10051Fructose_and_mannose_metabolism
VIT_04s0023g02130		-1.0123	1,4-beta-mannan endohydrolase	E3_2_1_78	vv10051Fructose_and_mannose_metabolism
VIT_11s0016g02850		1.05531	Phosphofructokinase	E2_7_1_90	vv10051Fructose_and_mannose_metabolism
VIT_00s2077g00020		-1.24616	Alkaline alpha galactosidase II	E3_2_1_22	vv10052Galactose_metabolism	vv10561Glycerolipid_metabolism
VIT_00s0375g00030		-1.74432	Alpha-galactosidase	E3_2_1_22	vv10052Galactose_metabolism	vv10561Glycerolipid_metabolism
VIT_00s2527g00010		1.55193	Beta-fructosidase (BFRUCT3)	E3_2_1_26	vv10052Galactose_metabolism	vv10500Starch_and_sucrose_metabolism
VIT_14s0060g00810		1.81959	Galactinol synthase	E2_4_1_123	vv10052Galactose_metabolism
VIT_13s0074g00720		1.11902	Neutral/alkaline invertase	E3_2_1_26	vv10052Galactose_metabolism	vv10500Starch_and_sucrose_metabolism
VIT_00s1530g00010		-1.1023	Stachyose synthase precursor	E2_4_1_67	vv10052Galactose_metabolism
VIT_00s0878g00020		-1.25537	Stachyose synthase precursor	E2_4_1_67	vv10052Galactose_metabolism
VIT_02s0025g04210		1.90968	UDP-glucose 4-epimerase	E5_1_3_2	vv10052Galactose_metabolism	vv10520Nucleotide_sugars_metabolism
VIT_16s0022g00670		-1.64151	Vacuolar invertase 1, GIN1	E3_2_1_26	vv10052Galactose_metabolism	vv10500Starch_and_sucrose_metabolism
VIT_02s0154g00090		1.40124	Vacuolar invertase 2, GIN2	E3_2_1_26	vv10052Galactose_metabolism	vv10500Starch_and_sucrose_metabolism
VIT_02s0025g01730		2.5795	3-oxoacyl-[acyl-carrier-protein] synthase	E2_3_1_41	vv10061Fatty_acid_biosynthesis
VIT_04s0008g04710		3.7964	Beta-ketoacyl-CoA synthase	E2_3_1_41	vv10061Fatty_acid_biosynthesis
VIT_05s0020g04540		1.4712	Beta-ketoacyl-CoA synthase	E2_3_1_41	vv10061Fatty_acid_biosynthesis
VIT_09s0054g01220		-1.34415	Cycloartenol synthase	E5_4_99_8	vv10100Biosynthesis_of_steroids
VIT_05s0020g01240		-1.04919	Geranylgeranyl pyrophosphate synthase	E2_5_1_29	vv10100Biosynthesis_of_steroids	vv10900Terpenoid_biosynthesis
VIT_06s0009g01740		-1.16813	Geranylgeranyl reductase	CHLP	vv10100Biosynthesis_of_steroids
VIT_18s0001g08550		-1.3701	Squalene monooxygenase	E1_14_99_7	vv10100Biosynthesis_of_steroids	vv10900Terpenoid_biosynthesis
VIT_05s0102g01170		-1.08499	Sterol-4-alpha-carboxylate 3-dehydrogenase, decarboxylating	E1_1_1_170	vv10100Biosynthesis_of_steroids
VIT_11s0052g00620		1.31772	AHA2 (Arabidopsis H(+)-ATPase 2)	K01535	vv10190Oxidative_phosphorylation	vv50131Primary_active_transporter_cat_A2_to_A4
VIT_04s0008g02580		-1.299	V-type H+-transporting ATPase subunit A	K02145	vv10190Oxidative_phosphorylation	vv44145Phagosome	vv50131Primary_active_transporter_cat_A2_to_A4
VIT_18s0001g01020		1.00451	V-type H+-transporting ATPase subunit B	K02147	vv10190Oxidative_phosphorylation	vv44145Phagosome	vv50131Primary_active_transporter_cat_A2_to_A4
VIT_15s0021g00880		-1.04831	ferredoxin-related	K02639	vv10195Photosynthesis
VIT_16s0013g00590		2.45188	Plastocyanin domain-containing protein	K02638	vv10195Photosynthesis	vv50113Thylakoid_targeting_pathway
VIT_11s0016g05530		2.01352	Plastocyanin domain-containing protein	K02638	vv10195Photosynthesis	vv50113Thylakoid_targeting_pathway
VIT_19s0014g02460		1.25431	Plastocyanin domain-containing protein	K02638	vv10195Photosynthesis	vv50113Thylakoid_targeting_pathway
VIT_05s0020g03130		-1.47285	Plastocyanin domain-containing protein	K02638	vv10195Photosynthesis	vv50113Thylakoid_targeting_pathway
VIT_17s0000g06350		-1.49591	LHCA4 (Photosystem I light harvesting complex gene 4)	K08910	vv10196Photosynthesis_antenna_proteins	vv50105Transport_electron_carriers
VIT_00s0181g00200		-1.92801	LHCB3 (light-harvesting chlorophyll binding protein 3)	K08914	vv10196Photosynthesis_antenna_proteins	vv50105Transport_electron_carriers
VIT_00s0181g00180		-2.26878	LHCB3 (light-harvesting chlorophyll binding protein 3)	K08914	vv10196Photosynthesis_antenna_proteins	vv50105Transport_electron_carriers
VIT_10s0003g02900		-1.29325	LHCII type I CAB-1	K08912	vv10196Photosynthesis_antenna_proteins	vv50105Transport_electron_carriers	vv50113Thylakoid_targeting_pathway
VIT_19s0014g00160		-1.35334	LHCII type I CAB-1	K08912	vv10196Photosynthesis_antenna_proteins	vv50105Transport_electron_carriers	vv50113Thylakoid_targeting_pathway
VIT_07s0005g02220		-1.38518	LHCII type I CAB-1	K08912	vv10196Photosynthesis_antenna_proteins	vv50105Transport_electron_carriers	vv50113Thylakoid_targeting_pathway
VIT_00s1937g00010		1.04502	Amine oxidase	E1_4_3_4	vv10220Urea_cycle_and_metabolism_of_amino_groups	vv10340Histidine_metabolism	vv10350Tyrosine_metabolism	vv10360Phenylalanine_metabolism	vv11002Auxin_biosynthesis
VIT_03s0038g00760		1.21777	Arginine decarboxylase (Fragment)	E4_1_1_19	vv10220Urea_cycle_and_metabolism_of_amino_groups	vv10251Glutamate_metabolism
VIT_00s0225g00090		1.48454	Copper amine oxidase	E1_4_3_4	vv10220Urea_cycle_and_metabolism_of_amino_groups	vv10340Histidine_metabolism	vv10350Tyrosine_metabolism	vv10360Phenylalanine_metabolism	vv11002Auxin_biosynthesis
VIT_06s0004g05340		-1.07194	Tropinone reductase	E1_1_1_206	vv10220Urea_cycle_and_metabolism_of_amino_groups
VIT_06s0004g05380		-1.23329	Tropinone reductase	E1_1_1_206	vv10220Urea_cycle_and_metabolism_of_amino_groups
VIT_13s0019g02140		-1.28012	Tropinone reductase	E1_1_1_206	vv10220Urea_cycle_and_metabolism_of_amino_groups
VIT_06s0004g05330		-1.34514	Tropinone reductase	E1_1_1_206	vv10220Urea_cycle_and_metabolism_of_amino_groups
VIT_06s0004g05310		-1.40771	Tropinone reductase	E1_1_1_206	vv10220Urea_cycle_and_metabolism_of_amino_groups
VIT_04s0008g05620		1.50395	Adenine phosphoribosyltransferase	E2_4_2_7	vv10230Purine_metabolism
VIT_03s0063g00060		1.17744	IMP dehydrogenase	E1_1_1_205	vv10230Purine_metabolism
VIT_01s0011g03660		2.09518	IMP dehydrogenase/GMP reductase	E1_1_1_205	vv10230Purine_metabolism
VIT_05s0020g04210		1.00175	Sulfate adenylyltransferase 3	E2_7_7_4	vv10230Purine_metabolism	vv10450Selenoamino_acid_metabolism	vv10920Sulfur_metabolism
VIT_19s0015g01730		1.06876	Uridine/cytidine kinase 1	E2_7_1_48	vv10240Pyrimidine_metabolism
VIT_16s0039g02720		1.74096	Glutamate dehydrogenase 2 (GDH2)	E1_4_1_2	vv10251Glutamate_metabolism	vv10910Nitrogen_metabolism
VIT_17s0000g05070		-2.6112	Phytochelatin synthetase	E2_3_2_15	vv10251Glutamate_metabolism
VIT_04s0008g03770		1.04919	Aspartate aminotransferase P1	E2_6_1_1	vv10252Alanine_and_aspartate_metabolism	vv10272Cysteine_metabolism	vv10330Arginine_and_proline_metabolism	vv10350Tyrosine_metabolism	vv10360Phenylalanine_metabolism	vv10400Phenylalanine_tyrosine_and_tryptophan_biosynthesis	vv10710Carbon_fixation	vv10950Alkaloid_biosynthesis_I
VIT_17s0000g01190		-1.16694	Phosphatidylglycerol specific phospholipase C	E3_1_4_3	vv10260Glycine_serine_and_threonine_metabolism	vv10562Inositol_phosphate_metabolism	vv10564Glycerophospholipid_metabolism	vv10565Ether_lipid_metabolism	vv34020Calcium_signaling_pathway
VIT_04s0069g00860		1.62018	Sarcosine oxidase	E1_5_3_1	vv10260Glycine_serine_and_threonine_metabolism
VIT_01s0011g06450		2.05824	Deoxymugineic acid synthase	DMAS	vv10271Methionine_metabolism
VIT_01s0011g06460		1.38928	Deoxymugineic acid synthase	DMAS	vv10271Methionine_metabolism
VIT_05s0020g03860		1.03957	Homocysteine S-methyltransferase 3	E2_1_1_10	vv10271Methionine_metabolism
VIT_07s0095g00760		-1.08001	Methionyl-tRNA synthetase	E6_1_1_10	vv10271Methionine_metabolism	vv10450Selenoamino_acid_metabolism	vv20970Aminoacyl-tRNA_biosynthesis
VIT_08s0007g05000		1.68235	S-adenosylmethionine synthetase	E2_5_1_6	vv10271Methionine_metabolism	vv10450Selenoamino_acid_metabolism
VIT_04s0044g00250		1.06085	Beta-cyanoalanine synthase 1	E2_5_1_47	vv10272Cysteine_metabolism	vv10450Selenoamino_acid_metabolism	vv10920Sulfur_metabolism
VIT_12s0142g00530		-1.13657	Gamma-glutamyltranspeptidase	E2_3_2_2	vv10272Cysteine_metabolism	vv10450Selenoamino_acid_metabolism	vv10480Glutathione_metabolism
VIT_09s0002g03450		1.08294	Taurine dioxygenase	E1_14_11_17	vv10272Cysteine_metabolism
VIT_17s0000g02140		1.4804	3-hydroxyisobutyrate dehydrogenase	E1_1_1_31	vv10280Valine_leucine_and_isoleucine_degradation
VIT_11s0016g00280		1.26017	Bifunctional lysine-ketoglutarate reductase/saccharopine dehydrogenase	E1_5_1_7	vv10300Lysine_biosynthesis
VIT_06s0004g00590		1.18195	Lysine decarboxylase	E4_1_1_18	vv10300Lysine_biosynthesis
VIT_03s0088g01180		1.93558	Proline iminopeptidase	E3_4_11_5	vv10330Arginine_and_proline_metabolism
VIT_12s0028g00710		1.35091	4-hydroxyphenylpyruvate dioxygenase	E1_13_11_27	vv10350Tyrosine_metabolism	vv10360Phenylalanine_metabolism
VIT_00s0480g00070		-1.5701	Polyphenol oxidase II, chloroplast precursor	E1_10_3_1	vv10350Tyrosine_metabolism	vv50109Incompletely_characterized_transport_systems
VIT_10s0116g00560		-1.7285	Polyphenol oxidase II, chloroplast precursor	E1_10_3_1	vv10350Tyrosine_metabolism	vv50109Incompletely_characterized_transport_systems
VIT_14s0068g01920		1.04911	Peroxidase	E1_11_1_7	vv10360Phenylalanine_metabolism	vv10680Methane_metabolism
VIT_02s0012g00540		-1.17188	Peroxidase	E1_11_1_7	vv10360Phenylalanine_metabolism	vv10680Methane_metabolism
VIT_07s0191g00050		-1.19854	Peroxidase 17	E1_11_1_7	vv10360Phenylalanine_metabolism	vv10680Methane_metabolism
VIT_07s0129g00360		1.22963	Peroxidase 73	E1_11_1_7	vv10360Phenylalanine_metabolism	vv10680Methane_metabolism
VIT_04s0023g02280		5.50128	S-adenosyl-L-methionine:salicylic acid carboxyl methyltransferase	SAMTBSCMT	vv10360Phenylalanine_metabolism
VIT_04s0023g02310		5.71796	S-adenosyl-L-methionine:salicylic acid methyltransferase	SAMTBSCMT	vv10360Phenylalanine_metabolism
VIT_08s0007g01930		2.37798	Anthranilate N-benzoyltransferase	E2_3_1_144	vv10400Phenylalanine_tyrosine_and_tryptophan_biosynthesis
VIT_07s0031g00280		-1.28226	Anthranilate N-hydroxycinnamoyl/benzoyltransferase	E2_3_1_144	vv10400Phenylalanine_tyrosine_and_tryptophan_biosynthesis
VIT_02s0087g00370		-1.31216	Anthranilate N-hydroxycinnamoyl/benzoyltransferase	E2_3_1_144	vv10400Phenylalanine_tyrosine_and_tryptophan_biosynthesis
VIT_08s0007g06170		-1.05043	Anthranilate phosphoribosyltransferase	E2_4_2_18	vv10400Phenylalanine_tyrosine_and_tryptophan_biosynthesis
VIT_13s0067g00400		1.22532	Anthranilate synthase alpha 1	E4_1_3_27	vv10400Phenylalanine_tyrosine_and_tryptophan_biosynthesis
VIT_19s0015g01660		-1.34318	Phenylalanine-tRNA ligase	E6_1_1_20	vv10400Phenylalanine_tyrosine_and_tryptophan_biosynthesis	vv20970Aminoacyl-tRNA_biosynthesis
VIT_12s0059g00750		1.54796	Prephenate dehydratase	E4_2_1_51	vv10400Phenylalanine_tyrosine_and_tryptophan_biosynthesis
VIT_02s0033g00670		1.52739	Nitrilase 4B	E3_5_5_1	vv10460Cyanoamino_acid_metabolism	vv10910Nitrogen_metabolism	vv11002Auxin_biosynthesis
VIT_02s0033g00870		1.08968	Nitrilase 4B	E3_5_5_1	vv10460Cyanoamino_acid_metabolism	vv10910Nitrogen_metabolism	vv11002Auxin_biosynthesis
VIT_07s0104g01810		2.18058	Glutathione S-transferase 13 GSTF13	E2_5_1_18_GSTF13	vv10480Glutathione_metabolism
VIT_07s0104g01800		1.73895	Glutathione S-transferase 13 GSTF13	E2_5_1_18_GSTF13	vv10480Glutathione_metabolism
VIT_07s0005g04890		1.52249	Glutathione S-transferase 25 GSTU7	E2_5_1_18_GSTU7	vv10480Glutathione_metabolism
VIT_15s0024g01540		-1.72514	Glutathione S-transferase 8 GSTU8	E2_5_1_18_GSTU8	vv10480Glutathione_metabolism
VIT_05s0020g01910		1.74885	1,4-alpha-D-glucan maltohydrolase	E3_2_1_2	vv10500Starch_and_sucrose_metabolism
VIT_00s0270g00120		1.64225	Alpha-amylase/subtilisin inhibitor	E3_2_1_1	vv10500Starch_and_sucrose_metabolism
VIT_17s0119g00120		1.3433	Alpha-amylase/subtilisin inhibitor	E3_2_1_1	vv10500Starch_and_sucrose_metabolism
VIT_15s0046g01210		-1.98177	Arbutin synthase	E2_4_1_218	vv10500Starch_and_sucrose_metabolism
VIT_07s0005g01300		2.34146	Auxin-induced beta-glucosidase	E3_2_1_21	vv10500Starch_and_sucrose_metabolism	vv10902Monoterpenoid_biosynthesis	vv40006Cell_wall
VIT_03s0091g00810		1.1916	Beta-1,4-xylosidase	E3_2_1_37	vv10500Starch_and_sucrose_metabolism	vv10520Nucleotide_sugars_metabolism
VIT_05s0051g00010		1.05615	Beta-amylase 1	E3_2_1_2	vv10500Starch_and_sucrose_metabolism
VIT_19s0014g00090		-1.24268	Glucan endo-1,3-beta-glucosidase 4 precursor	E3_2_1_39	vv10500Starch_and_sucrose_metabolism
VIT_18s0001g12390		1.28499	Glucan endo-1,3-beta-glucosidase 7 precursor	E3_2_1_39	vv10500Starch_and_sucrose_metabolism
VIT_00s2563g00010		1.0672	Glycogenin glucosyltransferase	E2_4_1_186	vv10500Starch_and_sucrose_metabolism
VIT_15s0046g01960		-1.92171	Hydroquinone glucosyltransferase	E2_4_1_218	vv10500Starch_and_sucrose_metabolism
VIT_00s0220g00070		1.29879	Latex cyanogenic beta glucosidase	E3_2_1_21	vv10500Starch_and_sucrose_metabolism	vv10902Monoterpenoid_biosynthesis	vv40006Cell_wall
VIT_01s0026g00280		1.41881	Trehalose 6-phosphate synthase	E2_4_1_15	vv10500Starch_and_sucrose_metabolism
VIT_17s0000g08010		1.1727	Trehalose 6-phosphate synthase	E2_4_1_15	vv10500Starch_and_sucrose_metabolism
VIT_15s0046g01000		4.35209	Trehalose-6-phosphate phosphatase	E3_1_3_12	vv10500Starch_and_sucrose_metabolism
VIT_00s0304g00080		1.13842	Trehalose-6-phosphate phosphatase	E3_1_3_12	vv10500Starch_and_sucrose_metabolism
VIT_02s0154g00110		1.5541	Trehalose-6-phosphate phosphatase (AtTPPA)	E3_1_3_12	vv10500Starch_and_sucrose_metabolism
VIT_06s0004g06390		-1.28326	UDP-glucose glucosyltransferase	E2_4_1_35	vv10500Starch_and_sucrose_metabolism
VIT_05s0094g00990		-1.42349	UDP-glucose:salicylic acid glucosyltransferase	E2_4_1_35	vv10500Starch_and_sucrose_metabolism
VIT_18s0001g02770		2.6093	Alpha-L-fucosidase 2 precursor	E3_2_1_51	vv10511N-Glycan_degradation
VIT_14s0128g00520		1.27995	Alpha-L-fucosidase 2 precursor	E3_2_1_51	vv10511N-Glycan_degradation
VIT_07s0005g02040		-2.19965	Alpha-L-fucosidase 2 precursor	E3_2_1_51	vv10511N-Glycan_degradation
VIT_19s0014g03240		-1.0824	Beta-mannosidase 4	E3_2_1_25	vv10511N-Glycan_degradation
VIT_05s0094g00200		1.21876	Chitinase class IV	E3_2_1_14	vv10530Aminosugars_metabolism
VIT_05s0094g00330		5.31607	Chitinase, class IV [Vitis vinifera]	E3_2_1_14	vv10530Aminosugars_metabolism
VIT_11s0206g00030		1.42779	Chitinase, class V	E3_2_1_14	vv10530Aminosugars_metabolism
VIT_05s0077g01250		1.91261	Endochitinase A2 precursor	E3_2_1_14	vv10530Aminosugars_metabolism
VIT_18s0001g01640		1.47268	UDP-sugar pyrophospharylase	E2_7_7_23	vv10530Aminosugars_metabolism
VIT_08s0007g02000		1.4906	Glycerol-3-phosphate acyltransferase 8	E2_3_1_15	vv10561Glycerolipid_metabolism	vv10564Glycerophospholipid_metabolism
VIT_13s0019g01990		2.01701	Phospholipid/glycerol acyltransferase	E2_3_1_51	vv10561Glycerolipid_metabolism	vv10564Glycerophospholipid_metabolism	vv10565Ether_lipid_metabolism
VIT_05s0020g00930		-1.10218	Soluble diacylglycerol acyltransferase	E2_3_1_20	vv10561Glycerolipid_metabolism	vv50124Porters_cat_30_to_64
VIT_07s0005g01240		2.47695	Triacylglycerol lipase	E3_1_1_3	vv10561Glycerolipid_metabolism
VIT_00s0394g00030		1.51887	Triacylglycerol lipase	E3_1_1_3	vv10561Glycerolipid_metabolism
VIT_02s0012g00550		-1.5869	Inositol polyphosphate 5-phosphatase II	E3_1_3_56	vv10562Inositol_phosphate_metabolism	vv34070Phosphatidylinositol_signaling_system
VIT_05s0020g03770		-1.81172	Inositol polyphosphate 5'-phosphatase	E3_1_3_56	vv10562Inositol_phosphate_metabolism	vv34070Phosphatidylinositol_signaling_system
VIT_08s0007g05240		1.60488	Phosphatidylinositol-4-phosphate 5-kinase	E2_7_1_68	vv10562Inositol_phosphate_metabolism	vv34070Phosphatidylinositol_signaling_system	vv44810Regulation_of_actin_cytoskeleton	vv50110Protein_coat
VIT_14s0219g00280		-1.03177	Glycerol-3-phosphate dehydrogenase (NAD+)	E1_1_1_8	vv10564Glycerophospholipid_metabolism
VIT_04s0023g00940		1.05774	Phospholipase A1	E3_1_1_32	vv10564Glycerophospholipid_metabolism	vv10592Alpha-linolenic_acid_metabolism
VIT_14s0083g00110		-1.23381	Allene oxide cyclase	E5_3_99_6	vv10592alpha-Linolenic_acid_metabolism
VIT_18s0001g12880		-1.23727	Jasmonate O-methyltransferase	E2_1_1_141	vv10592alpha-Linolenic_acid_metabolism
VIT_06s0004g01450		1.50267	Lipoxygenase (LOX2)	E1_13_11_12	vv10592alpha-Linolenic_acid_metabolism
VIT_06s0004g01500		1.08557	Lipoxygenase (LOX2)	E1_13_11_12	vv10592alpha-Linolenic_acid_metabolism
VIT_13s0064g01480		1.85055	Lipoxygenase LOX1	E1_13_11_12	vv10592alpha-Linolenic_acid_metabolism
VIT_11s0016g03130		1.42643	Ceramide glucosyltransferase	E2_4_1_80	vv10600Sphingolipid_metabolism
VIT_00s0194g00110		1.21131	4-nitrophenylphosphatase	E3_1_3_18	vv10630Glyoxylate_and_dicarboxylate_metabolism
VIT_02s0025g04730		1.28074	Glyoxylate reductase	E1_1_1_26	vv10630Glyoxylate_and_dicarboxylate_metabolism
VIT_05s0020g03190		2.03768	Haloacid dehalogenase hydrolase	E3_1_3_18	vv10630Glyoxylate_and_dicarboxylate_metabolism
VIT_08s0007g00540		1.31488	Haloacid dehalogenase hydrolase	E3_1_3_18	vv10630Glyoxylate_and_dicarboxylate_metabolism
VIT_02s0025g03520		1.02177	Haloacid dehalogenase hydrolase	E3_1_3_18	vv10630Glyoxylate_and_dicarboxylate_metabolism
VIT_10s0003g05420		-1.46876	S-2-hydroxy-acid oxidase, peroxisomal	E1_1_3_15	vv10630Glyoxylate_and_dicarboxylate_metabolism
VIT_03s0091g01080		-1.42588	1-aminocyclopropane-1-carboxylate oxidase	E1_14_17_4	vv10640Propanoate_metabolism	vv30008Ethylene_signaling
VIT_07s0005g03060		-2.8738	1-aminocyclopropane-1-carboxylate oxidase homolog 1	E1_14_17_4	vv10640Propanoate_metabolism	vv30008Ethylene_signaling
VIT_07s0005g04130		1.59573	Acid phosphatase class B	E3_1_3_2	vv10740Riboflavin_metabolism
VIT_11s0052g00120		-1.69616	Purple acid phosphatase 28- ATPAP28/PAP28	E3_1_3_2	vv10740Riboflavin_metabolism
VIT_03s0038g01350		-1.41685	Glutamine amidotransferase class-I	K08681	vv10750Vitamin_B6_metabolism
VIT_19s0014g02170		1.58093	4-amino-4-deoxychorismate lyase	E4_1_3_38	vv10790Folate_biosynthesis
VIT_08s0058g00440		1.97527	ferritin	E1_16_3_1	vv10860Porphyrin_and_chlorophyll_metabolism
VIT_08s0058g00430		1.79388	ferritin	E1_16_3_1	vv10860Porphyrin_and_chlorophyll_metabolism
VIT_08s0007g08540		-1.12071	Mg-chelatase subunit XANTHA-F	E6_6_1_1_GUN5	vv10860Porphyrin_and_chlorophyll_metabolism	vv30001ABA_signaling
VIT_03s0063g01960		1.29052	Non-symbiotic hemoglobin class 1	C01708	vv10860Porphyrin_and_chlorophyll_metabolism
VIT_06s0061g00790		1.00416	Pheophorbide a oxygenase	E1_14_12_20	vv10860Porphyrin_and_chlorophyll_metabolism	vv50133Primary_active_transporter_cat_A9_to_A18
VIT_10s0003g03520		-1.20649	Beta-amyrin synthase	E5_4_99_BAS	vv10900Terpenoid_biosynthesis
VIT_04s0210g00050		1.95684	Strictosidine synthase	E4_3_3_2	vv10900Terpenoid_biosynthesis	vv10902Monoterpenoid_biosynthesis
VIT_04s0210g00030		1.4252	Strictosidine synthase	E4_3_3_2	vv10900Terpenoid_biosynthesis	vv10902Monoterpenoid_biosynthesis
VIT_11s0016g00870		-1.03318	Strictosidine synthase (YLS2)	E4_3_3_2	vv10900Terpenoid_biosynthesis	vv10902Monoterpenoid_biosynthesis
VIT_17s0000g09570		1.26102	CYP71A26	E1_14_13_73	vv10902Monoterpenoid_biosynthesis
VIT_10s0092g00370		-2.25869	CYP71D7	E1_14_13_73	vv10902Monoterpenoid_biosynthesis
VIT_19s0177g00030		-1.06861	Gibberellin 2-beta-dioxygenase 7	E1_14_11_13	vv10904Diterpenoid_biosynthesis
VIT_04s0044g02010		-1.65165	Gibberellin 20 oxidase 2	E1_14_11_12	vv10904Diterpenoid_biosynthesis
VIT_06s0004g07650		1.6964	Taxadien-5-alpha-ol-O-acetyltransferase	E2_3_1_162	vv10904Diterpenoid_biosynthesis
VIT_09s0002g05980		-1.90391	CYP734A7 castasterone 26-hydroxylase	CYP734A7	vv10905Brassinosteroid_biosynthesis
VIT_02s0087g00930		4.01483	9-cis-epoxycarotenoid dioxygenase	E1_13_11_51	vv10906Carotenoid_biosynthesis	vv11013ABA_biosynthesis	vv30001ABA_signaling
VIT_02s0087g00910		1.11104	9-cis-epoxycarotenoid dioxygenase	E1_13_11_51	vv10906Carotenoid_biosynthesis	vv11013ABA_biosynthesis	vv30001ABA_signaling
VIT_10s0003g03750		1.21957	9-cis-epoxycarotenoid dioxygenase 2	E1_13_11_51	vv10906Carotenoid_biosynthesis	vv11013ABA_biosynthesis	vv30001ABA_signaling
VIT_02s0087g00710		2.08923	ABA 8'-hydroxylase CYP707A1	E1_14_13_93	vv10906Carotenoid_biosynthesis	vv11013ABA_biosynthesis	vv30001ABA_signaling
VIT_18s0001g05910		-1.20366	Cis-zeatin O-beta-D-glucosyltransferase	E2_4_1_215	vv10908Zeatin_biosynthesis
VIT_18s0001g13200		-1.2822	Cytokinin dehydrogenase 5 precursor	E1_5_99_12	vv10908Zeatin_biosynthesis
VIT_04s0008g01880		-1.16774	Cytokinin dehydrogenase 7	E1_5_99_12	vv10908Zeatin_biosynthesis
VIT_09s0070g00710		-1.24917	Isopentenyltransferase	E2_5_1_27	vv10908Zeatin_biosynthesis
VIT_18s0001g06910		1.22703	Purine permease 1 PUP1	PUP1	vv10908Zeatin_biosynthesis	vv50122Porters_cat_7_to_17
VIT_06s0004g06830		4.00713	Asparagine synthetase	E6_3_5_4	vv10910Nitrogen_metabolism
VIT_08s0007g04800		1.44121	Carbonic anhydrase precursor	E4_2_1_1	vv10910Nitrogen_metabolism	vv50124Porters_cat_30_to_64
VIT_08s0007g03240		-2.18494	Carbonic anhydrase precursor	E4_2_1_1	vv10910Nitrogen_metabolism	vv50124Porters_cat_30_to_64
VIT_02s0033g00800		1.51411	Nitrilase 4 (NIT4)	K13035	vv10910Nitrogen_metabolism
VIT_02s0012g01570		1.81952	Cinnamoyl-CoA reductase	E1_2_1_44	vv10940Phenylpropanoid_biosynthesis
VIT_13s0067g00580		-1.57068	Cinnamyl alcohol dehydrogenase	E1_1_1_195	vv10940Phenylpropanoid_biosynthesis
VIT_03s0038g00550		-1.06736	ferulate 5-hydroxylase	K09755	vv10940Phenylpropanoid_biosynthesis
VIT_03s0038g00500		-1.52236	ferulate 5-hydroxylase	K09755	vv10940Phenylpropanoid_biosynthesis
VIT_04s0023g02900		2.28902	Ferulate-5-hydroxylase	K09755	vv10940Phenylpropanoid_biosynthesis
VIT_17s0000g00950		1.85402	Hydroxycinnamoyl-CoA quinate hydroxycinnamoyltransferase	E2_3_1_99	vv10940Phenylpropanoid_biosynthesis
VIT_16s0100g01100		1.10817	Stilbene synthase	E2_3_1_95	vv10940Phenylpropanoid_biosynthesis
VIT_15s0046g01170		-1.36603	Dihydroflavonol 4-reductase (dihydrokaempferol 4-reductase) (BAN)	E1_1_1_219	vv10941Flavonoid_biosynthesis
VIT_02s0109g00310		1.33949	flavonoid 3-monooxygenase	E1_14_13_21	vv10941Flavonoid_biosynthesis
VIT_11s0016g01020		-1.05801	flavonoid 3-monooxygenase	E1_14_13_21	vv10941Flavonoid_biosynthesis
VIT_18s0001g11520		-1.62446	flavonoid 3-monooxygenase	E1_14_13_21	vv10941Flavonoid_biosynthesis
VIT_05s0094g01200		-1.16415	flavonoid 3'-hydroxylase cytochrome P450	E1_14_13_21	vv10941Flavonoid_biosynthesis
VIT_06s0009g02880		2.92055	Flavonoid 3',5'-hydroxylase	E1_14_13_88	vv10941Flavonoid_biosynthesis
VIT_06s0009g02830		2.60531	Flavonoid 3',5'-hydroxylase	E1_14_13_88	vv10941Flavonoid_biosynthesis
VIT_06s0009g02840		2.26428	Flavonoid 3',5'-hydroxylase	E1_14_13_88	vv10941Flavonoid_biosynthesis
VIT_06s0009g02970		1.89995	Flavonoid 3',5'-hydroxylase	E1_14_13_88	vv10941Flavonoid_biosynthesis
VIT_06s0009g02810		1.4958	Flavonoid 3',5'-hydroxylase	E1_14_13_88	vv10941Flavonoid_biosynthesis
VIT_06s0009g02920		2.82954	flavonoid 3',5'-hydroxylase [Vitis vinifera]	E1_14_13_88	vv10941Flavonoid_biosynthesis
VIT_06s0009g03010		2.77309	flavonoid 3',5'-hydroxylase [Vitis vinifera]	E1_14_13_88	vv10941Flavonoid_biosynthesis
VIT_18s0001g03510		-1.56661	Flavonol synthase	E1_14_11_23	vv10941Flavonoid_biosynthesis
VIT_18s0001g14310		1.01566	Flavonone- 3-hydroxylase	E1_14_11_9	vv10941Flavonoid_biosynthesis
VIT_08s0105g00380		1.17576	Leucoanthocyanidin dioxygenase	E1_14_11_19	vv10941Flavonoid_biosynthesis
VIT_01s0011g02960		3.62736	Leucoanthocyanidin reductase 1	E1_17_1_3	vv10941Flavonoid_biosynthesis
VIT_12s0134g00630		1.1227	Quercetin 3-O-glucoside-6''-O-malonyltransferase	E2_3_1_116	vv10941Flavonoid_biosynthesis
VIT_02s0025g02920		2.32314	Quercetin 3-O-methyltransferase 1	E2_1_1_76	vv10941Flavonoid_biosynthesis
VIT_18s0041g00980		2.446	UDP-glucose: anthocyanidin 5,3-O-glucosyltransferase	E2_4_1_238	vv10941Flavonoid_biosynthesis	vv10942Anthocyanin_biosynthesis
VIT_12s0134g00590		1.13007	Anthocyanidin 3-O-glucoside-6''-O-malonyltransferase	E2_3_1_171	vv10942Anthocyanin_biosynthesis
VIT_18s0041g00810		3.61306	UDP-glucose: anthocyanidin 5,3-O-glucosyltransferase	RHGT1	vv10942Anthocyanin_biosynthesis
VIT_18s0041g00910		2.88503	UDP-glucose: anthocyanidin 5,3-O-glucosyltransferase	RHGT1	vv10942Anthocyanin_biosynthesis
VIT_18s0041g00710		-1.50461	UDP-glucose: anthocyanidin 5,3-O-glucosyltransferase	RHGT1	vv10942Anthocyanin_biosynthesis
VIT_06s0004g06370		-1.55286	UDP-glucose: anthocyanidin 5,3-O-glucosyltransferase	RHGT1	vv10942Anthocyanin_biosynthesis
VIT_16s0050g01680		-1.57126	UDP-glucose: anthocyanidin 5,3-O-glucosyltransferase	RHGT1	vv10942Anthocyanin_biosynthesis
VIT_08s0007g07720		-2.57966	CYP93A1 2-hydroxyisoflavanone synthase	E1_14_13_86	vv10943Isoflavonoid_biosynthesis
VIT_10s0003g00480		1.77635	Isoflavone methyltransferase/ Orcinol O-methyltransferase 1 oomt1	E2_1_1_46	vv10943Isoflavonoid_biosynthesis
VIT_03s0038g04620		-1.11671	Isoflavone reductase	E1_3_1_45	vv10943Isoflavonoid_biosynthesis
VIT_18s0001g13770		1.6322	Cytochrome P450, family 83, subfamily B, polypeptide 1	K11818	vv10966Glucosinolate_biosynthesis
VIT_18s0001g13780		1.23649	Cytochrome P450, family 83, subfamily B, polypeptide 1	K11818	vv10966Glucosinolate_biosynthesis
VIT_18s0001g13790		1.22646	Cytochrome P450, family 83, subfamily B, polypeptide 1	K11818	vv10966Glucosinolate_biosynthesis
VIT_04s0008g03920		-2.52982	Dimethylaniline monooxygenase, N-oxide-forming	E1_14_13_8	vv11000Single_reactions
VIT_03s0038g03130		-2.00067	Flavin containing monooxygenase 3	E1_14_13_8	vv11000Single_reactions
VIT_17s0000g06790		-2.97717	flavin-containing monooxygenase	E1_14_13_8	vv11000Single_reactions
VIT_03s0038g03180		1.0165	flavin-containing monooxygenase 1	E1_14_13_8	vv11000Single_reactions
VIT_13s0067g01970		1.83178	Laccase	E1_10_3_2	vv11000Single_reactions	vv50109Incompletely_characterized_transport_systems
VIT_08s0007g01550		1.40466	Laccase	E1_10_3_2	vv11000Single_reactions	vv50109Incompletely_characterized_transport_systems
VIT_12s0028g03480		1.40829	Wax synthase	E2_3_1_75	vv11000Single_reactions
VIT_15s0046g00480		1.1669	Wax synthase	E2_3_1_75	vv11000Single_reactions
VIT_15s0046g00510		1.13049	Wax synthase	E2_3_1_75	vv11000Single_reactions
VIT_12s0059g01870		1.11631	GH3-like protein	AUXINBIOSYNTHESIS_GH3	vv11002Auxin_biosynthesis
VIT_18s0001g02570		-1.12179	IAA-amino acid hydrolase 6	IAR6	vv11002Auxin_biosynthesis
VIT_06s0004g07220		1.04081	Indole-3-acetate beta-glucosyltransferase	E2_4_1_121	vv11002Auxin_biosynthesis
VIT_06s0004g07310		-1.01448	Indole-3-acetate beta-glucosyltransferase	E2_4_1_121	vv11002Auxin_biosynthesis
VIT_01s0150g00300		2.38594	Indole-3-acetic acid amido synthetase	AUXINBIOSYNTHESIS_GH3	vv11002Auxin_biosynthesis
VIT_19s0014g04690		1.99971	Indole-3-acetic acid-amido synthetase	AUXINBIOSYNTHESIS_GH3	vv11002Auxin_biosynthesis
VIT_07s0129g00660		-1.50892	Indole-3-acetic acid-amido synthetase GH3.2	AUXINBIOSYNTHESIS_GH3	vv11002Auxin_biosynthesis
VIT_06s0061g00560		1.39602	Exostosin FRA8 (Fragile fiber8)	K02366	vv11030Glycan_structures-biosynthesis1
VIT_00s0214g00020		-1.60511	TORMOZembryo defective UTP13	K14555	vv23008Ribosome_biogenesis_in_Eukaryotes
VIT_17s0000g02150		1.95914	Ribosomal protein L19	K02884	vv23010Ribosome
VIT_14s0060g00170		-1.14507	Nuclear pore complex protein Nup98-Nup96	K14297	vv23013RNA_transport	vv50109Incompletely_characterized_transport_systems	vv50112Nuclear_pore_complex
VIT_13s0019g00640		-1.24046	THO complex subunit 4	K12881	vv23013RNA_transport	vv23015mRNA_surveillance_pathway	Vv23040Spliceosome
VIT_08s0007g04850		1.10532	Protein phosphatase 2 (formerly 2A), regulatory subunit B'	K11584	vv23015mRNA_surveillance_pathway
VIT_04s0023g02020		-1.24502	replication factor C subunit 3/5	K10756	vv23030DNA_replication	vv23420Nucleotide_excision_repair	vv23430Mismatch_repair
VIT_13s0019g04080		-1.08409	Protein transport protein Sec61 subunit beta	K09481	vv23060Protein_export	vv24141Protein_processing_in_endoplasmic_reticulum	vv44145Phagosome	vv50111Tethering_factors	vv50132Primary_active_transporter_cat_A5_to_A8
VIT_13s0019g01290		-1.00178	Crossover junction endonuclease MUS81	K08991	vv23440Homologous_recombination
VIT_19s0014g03200		-1.24049	COP1-interacting protein 7	CIP7	vv24120Ubiquitin_mediated_proteolysis
VIT_19s0014g03210		-1.58008	COP1-interacting protein 7	CIP7	vv24120Ubiquitin_mediated_proteolysis
VIT_08s0007g05880		1.2553	Dehydration-induced protein (ERD15)	ERD15	vv30001ABA_signaling
VIT_17s0053g00990		2.72568	Alpha-expansin 1 precursor	EXPA1	vv30003Auxin_signaling
VIT_14s0108g01020		1.14195	Alpha-expansin 1 precursor	EXPA1	vv30003Auxin_signaling
VIT_17s0000g06360		1.54309	Alpha-expansin 3	EXPA3	vv30003Auxin_signaling
VIT_15s0046g00290		-2.00982	Auxin response factor 18	ARF18	vv30003Auxin_signaling	vv60004ARF
VIT_06s0004g03130		-1.53943	Auxin response factor 4	ARF4	vv30003Auxin_signaling	vv60004ARF
VIT_09s0002g00670		-1.04321	Auxin responsive SAUR protein	SAUR	vv30003Auxin_signaling
VIT_09s0002g00650		-2.40338	Auxin-induced protein	AUXREG	vv30003Auxin_signaling
VIT_14s0030g02310		1.40006	Auxin-induced protein 22D	IAA22D_4	vv30003Auxin_signaling	vv60008AUXIAA
VIT_07s0141g00270		-2.10502	Auxin-induced protein 22D	IAA22D_1	vv30003Auxin_signaling	vv60008AUXIAA
VIT_03s0038g00940		-1.04579	Auxin-responsive	AUXREG	vv30003Auxin_signaling
VIT_02s0154g00010		1.67788	Auxin-responsive SAUR11	SAUR11	vv30003Auxin_signaling
VIT_07s0031g02740		2.0306	Auxin-responsive SAUR12	SAUR12	vv30003Auxin_signaling
VIT_01s0026g02620		3.24785	Expansin [Vitis labrusca x Vitis vinifera] EXPA15	EXPA15	vv30003Auxin_signaling
VIT_13s0067g02930		7.28462	Expansin [Vitis labrusca x Vitis vinifera] EXPA8	EXPA8	vv30003Auxin_signaling
VIT_09s0002g04080		-1.32794	IAA9	IAA9_2	vv30003Auxin_signaling	vv60008AUXIAA
VIT_04s0008g06380		-1.59181	TPR1 (topless-related 1)	TPR1	vv30003Auxin_signaling
VIT_04s0008g06400		-1.94491	TPR1 (topless-related 1)	TPR1	vv30003Auxin_signaling
VIT_04s0008g06390		-2.05763	TPR1 (topless-related 1)	TPR1	vv30003Auxin_signaling
VIT_12s0055g01280		1.17651	Brassinosteroid insensitive 1-associated receptor kinase 1	BAK1	vv30005Brassinosteroids_signaling	vv34626Plant-pathogen_interaction
VIT_01s0011g06410		-1.69978	BRL2 (BRI1-like 2)	BRL2	vv30005Brassinosteroids_signaling
VIT_09s0002g03520		-1.18386	Arabidopsis histidine phosphotransfer AHP4	AHP4	vv30007Cytokinin_signaling
VIT_13s0067g03070		2.07984	ARR17 typeA	ARR17	vv30007Cytokinin_signaling	vv60072Orphans_Response_reg
VIT_17s0000g07580		-1.18726	ARR6 typeA	ARR6	vv30007Cytokinin_signaling	vv60072Orphans_Response_reg
VIT_16s0098g00900		-1.14564	Pseudo-response regulator 5 (APRR5)	APRR5_1	vv30007Cytokinin_signaling	vv34710Circadian_rhythm	vv60050PseudoARR-B
VIT_11s0016g03350		-1.06466	AP2/EREBP transcription factor TINY2	TINY2_3	vv30008Ethylene_signaling	vv60003AP2_EREBP
VIT_18s0001g03240		1.00286	DREB sub A-5 of ERF/AP2 transcription factor	VvERF008	vv30008Ethylene_signaling	vv60003AP2_EREBP
VIT_08s0007g03040		1.06516	E8 protein	E8	vv30008Ethylene_signaling
VIT_09s0002g08960		-1.54923	EREBP-4	EREBP4	vv30008Ethylene_signaling
VIT_10s0003g00580		1.10577	ERF/AP2 transcription factor sub B-3 (ATERF-2)	VvERF075	vv30008Ethylene_signaling	vv30011Jasmonate_signaling	vv60003AP2_EREBP
VIT_05s0094g00480		-1.31085	Ethylene-responsive protein	ER33	vv30008Ethylene_signaling	vv60011BHLH
VIT_01s0010g02070		-1.32239	Ethylene-responsive protein	ERUNK_3	vv30008Ethylene_signaling	vv60011BHLH
VIT_03s0091g00210		-3.77087	Ethylene-responsive protein	ERUNK_4	vv30008Ethylene_signaling	vv60011BHLH
VIT_16s0013g01110		1.24078	Ethylene-responsive transcription factor 5	VvERF088/089/090	vv30008Ethylene_signaling	vv60003AP2_EREBP
VIT_12s0028g03270		1.9668	Ethylene-responsive transcription factor 9	ERF9_1	vv30008Ethylene_signaling	vv60003AP2_EREBP
VIT_09s0002g09140		2.65456	Ethylene-responsive transcription factor ERF003	VvERF047	vv30008Ethylene_signaling	vv60003AP2_EREBP
VIT_04s0008g06000		1.68576	Ethylene-responsive transcription factor ERF003	VvERF045	vv30008Ethylene_signaling	vv60003AP2_EREBP
VIT_16s0013g01080		1.26379	Ethylene-responsive transcription factor ERF105	VvERF086	vv30008Ethylene_signaling	vv60003AP2_EREBP
VIT_02s0025g01360		1.47706	Ethylene-responsive transcription factor related to APETALA2 4	VvERF002	vv30008Ethylene_signaling	vv60003AP2_EREBP
VIT_18s0072g00260		2.37454	Ethylene-responsive transcription factor related to APETALA2 6	VvERF114	vv30008Ethylene_signaling	vv60003AP2_EREBP
VIT_01s0011g02790		1.34922	IDA (inflorescence deficient in abscission)	IDA	vv30008Ethylene_signaling
VIT_06s0004g03590		-2.0946	TOE1 (target of eat1 1) related to apetala2 7	AP2-12/15	vv30008Ethylene_signaling	vv30009Flower_development	vv60003AP2_EREBP
VIT_00s1353g00010		-1.08091	BAM1 (big apical meristem 1)	BAM1	vv30009Flower_development
VIT_14s0068g01380		-1.29786	Constans-like 14	COL14_2	vv30009Flower_development	vv34710Circadian_rhythm	vv60014C2C2-CO
VIT_17s0000g04130		-1.1813	MYB divaricata	DIVARICATA_11	vv30009Flower_development	vv60044MYB
VIT_18s0001g07650		-2.96023	VIN3	VIN3	vv30009Flower_development
VIT_18s0072g01110		-1.38895	GASA like	GASAL	vv30010Gibberellin_signaling
VIT_07s0104g00930		1.53427	Gibberellin receptor GID1L2	GID1B	vv30010Gibberellin_signaling
VIT_13s0064g00890		-1.05775	Cellulose synthase CESA3	E2_4_1_12_CESA3	vv30011Jasmonate_signaling	vv40006Cell_wall
VIT_11s0016g00710		1.26154	Jasmonate ZIM-domain protein 1	JAZ1_1	vv30011Jasmonate_signaling	vv60069ZIM
VIT_04s0023g01100		3.1108	Calmodulin	K02183	vv34020Calcium_signaling_pathway	vv34626Plant-pathogen_interaction
VIT_14s0006g01400		-1.00113	Calmodulin	K02183	vv34020Calcium_signaling_pathway	vv34626Plant-pathogen_interaction
VIT_19s0090g01550		-1.66338	Mo25	K08272	vv34150mTOR_signaling_pathway
VIT_11s0037g00690		-1.77555	CF5	K13471	vv34626Plant-pathogen_interaction
VIT_06s0004g02670		1.06557	Cyclic nucleotide-gated ion channel 15	K05391_CNGC15	vv34626Plant-pathogen_interaction	vv50101Channels_and_pores
VIT_16s0050g00200		1.04078	HcrVf3 protein	K13466	vv34626Plant-pathogen_interaction
VIT_06s0004g07500		1.02278	VvWRKY16	VvWRKY16	vv34626Plant-pathogen_interaction	vv60066WRKY
VIT_15s0046g02810		-1.00273	R protein PRF disease resistance protein	K13453	vv34627R_proteins_from_Plant-pathogen_interaction
VIT_14s0030g01210		-1.03882	R protein disease resistance protein	RPROT	vv34627R_proteins_from_Plant-pathogen_interaction
VIT_15s0107g00290		2.1843	R protein L6	K13477	vv34627R_proteins_from_Plant-pathogen_interaction
VIT_18s0075g00070		-1.0179	R protein L6	K13477	vv34627R_proteins_from_Plant-pathogen_interaction
VIT_18s0117g00050		-1.07807	R protein L6	K13477	vv34627R_proteins_from_Plant-pathogen_interaction
VIT_13s0067g03570		-1.03776	R protein MLA10	K13475	vv34627R_proteins_from_Plant-pathogen_interaction
VIT_19s0027g01740		-1.62557	RPS5 (resistant to p. syringae 5)	K13460	vv34627R_proteins_from_Plant-pathogen_interaction
VIT_07s0005g05100		-2.53406	Phytochrome interacting factor 3-like 5	PIL5	vv34710Circadian_rhythm	vv60011BHLH
VIT_12s0059g00990		1.40097	Cellulose synthase CSLB04	E2_4_1_12_CSLB04	vv40006Cell_wall
VIT_09s0018g01950		-1.04658	Cellulose synthase CSLC05	E2_4_1_12_CSLC05	vv40006Cell_wall
VIT_02s0025g01750		1.23719	Cellulose synthase CSLG3	E2_4_1_12_CSLG3	vv40006Cell_wall
VIT_02s0025g01380		2.07559	Endo-1,4-beta-glucanase	E3_2_1_4	vv40006Cell_wall
VIT_19s0015g00530		-1.1717	fasciclin arabinogalactan-protein (FLA1)	FLA1	vv40006Cell_wall
VIT_15s0048g01750		-1.63521	fasciclin arabinogalactan-protein (FLA8)	FLA8	vv40006Cell_wall
VIT_08s0032g00910		-1.20688	Fasciclin domain-containing protein FLA17	FLA17	vv40006Cell_wall
VIT_12s0057g01020		-1.50414	fasciclin-like arabinogalactan protein FLA2	FLA2	vv40006Cell_wall
VIT_02s0025g03290		1.04276	Hydroxyproline-rich glycoprotein	HRGP	vv40006Cell_wall
VIT_16s0022g00960		1.83891	Invertase/pectin methylesterase inhibitor	PMEI	vv40006Cell_wall
VIT_18s0001g10040		1.01693	LRX1 (leucine-rich repeat/extensin 1)	EXTENSIN	vv40006Cell_wall
VIT_03s0063g00010		-1.44657	LRX2 (leucine-rich repeat/extensin 2)	EXTENSIN	vv40006Cell_wall
VIT_07s0005g05520		3.10845	Pectate lyase	E4_2_2_2	vv40006Cell_wall
VIT_14s0219g00230		1.08694	Pectate lyase	E4_2_2_2	vv40006Cell_wall
VIT_17s0000g09810		1.07384	Pectate lyase	E4_2_2_2	vv40006Cell_wall
VIT_00s0323g00070		3.91732	Pectin methylesterase inhibitor	PMEI	vv40006Cell_wall
VIT_07s0005g02440		-1.50109	Pectinacetylesterase	PAE	vv40006Cell_wall
VIT_15s0048g00510		2.12983	Pectinesterase family	E3_1_1_11	vv40006Cell_wall
VIT_12s0035g01900		1.81257	Pectinesterase family	E3_1_1_11	vv40006Cell_wall
VIT_16s0098g01900		-1.10116	Pectinesterase family	E3_1_1_11	vv40006Cell_wall
VIT_05s0062g01160		-2.72801	Pectinesterase family	E3_1_1_11	vv40006Cell_wall
VIT_02s0025g00260		1.84878	Polygalacturonase GH28	E3_2_1_15	vv40006Cell_wall
VIT_12s0028g01300		-1.77425	Polygalacturonase GH28	E3_2_1_15	vv40006Cell_wall
VIT_15s0046g02000		-1.94151	Polygalacturonase GH28	E3_2_1_15	vv40006Cell_wall
VIT_08s0007g07780		5.76074	Polygalacturonase PG1	E3_2_1_15	vv40006Cell_wall
VIT_08s0007g08330		5.74669	Polygalacturonase PG1	E3_2_1_15	vv40006Cell_wall
VIT_01s0026g00200		1.89106	Xyloglucan endotransglucosylase/hydrolase 28	E2_4_1_207	vv40006Cell_wall
VIT_02s0012g02220		1.25638	Xyloglucan endotransglucosylase/hydrolase 30	E2_4_1_207	vv40006Cell_wall
VIT_06s0061g00550		3.92052	Xyloglucan endotransglucosylase/hydrolase 32	E2_4_1_207	vv40006Cell_wall
VIT_01s0011g06250		1.4281	Xyloglucan endotransglycosylase	E2_4_1_207	vv40006Cell_wall
VIT_18s0001g07220		1.00596	Cyclin delta-2	CYCD2_1	vv44110Cell_cycle
VIT_15s0021g02680		-1.66269	Cyclin-U2-1 (CycU2;1) Cyclin-P3.1	CYCP3_1	vv44110Cell_cycle
VIT_10s0116g01700		1.04709	Autophagy 8c (APG8c)	K08341	vv44140Regulation_of_autophagy	vv50101Channels_and_pores
VIT_16s0050g00380		-1.48311	Tubulin beta-1	K07375	vv44145Phagosome	vv44810Regulation_of_actin_cytoskeleton
VIT_02s0025g03540		-2.09139	Tubulin beta-6 chain	K07375	vv44145Phagosome	vv44810Regulation_of_actin_cytoskeleton
VIT_16s0050g00350		-1.13005	Tubulin beta-8	K07375	vv44145Phagosome	vv44810Regulation_of_actin_cytoskeleton
VIT_03s0091g00580		1.39612	Protein Mpv17	K13348	vv44146Peroxisome
VIT_08s0007g01270		-1.57142	Dynein light chain LC6, flagellar outer arm	K10418	vv44810Regulation_of_actin_cytoskeleton
VIT_11s0016g05000		-1.43199	Dynein light chain LC8-type	K10418	vv44810Regulation_of_actin_cytoskeleton
VIT_09s0002g04480		1.2591	Kinesin family member 2/24	K10393	vv44810Regulation_of_actin_cytoskeleton
VIT_13s0019g04750		1.05689	Kinesin morphogenesis of root hair 2 (MRH2)	MRH2	vv44810Regulation_of_actin_cytoskeleton
VIT_16s0050g00670		-2.31218	Kinesin motor	KMOTOR	vv44810Regulation_of_actin_cytoskeleton
VIT_08s0007g05480		1.0372	Kinesin motor protein	KMOTOR	vv44810Regulation_of_actin_cytoskeleton
VIT_07s0005g00940		-1.38019	Kinesin motor protein	KMOTOR	vv44810Regulation_of_actin_cytoskeleton
VIT_01s0011g06330		-1.28878	Microtubule associated protein (MAP65-6)	MAP656	vv44810Regulation_of_actin_cytoskeleton
VIT_00s0194g00260		-1.21912	Microtubule associated protein (MAP70-5)	MAP705	vv44810Regulation_of_actin_cytoskeleton
VIT_13s0067g02400		-1.89914	Myosin heavy chain	K10352	vv44810Regulation_of_actin_cytoskeleton
VIT_16s0050g00100		-1.1207	Myosin-related	MYOSINR	vv44810Regulation_of_actin_cytoskeleton
VIT_04s0044g01880		1.18315	Auxin Efflux Carrier	AUXEFF	vv50004Auxin_transport	vv50125Porters_cat_66_to_94
VIT_04s0044g01870		-1.06692	Auxin efflux carrier	AUXEFF	vv50004Auxin_transport	vv50125Porters_cat_66_to_94
VIT_19s0090g01650		1.7446	LOP1 TRN1 (LOPPED 1, TORNADO 1)	LOP1	vv50004Auxin_transport
VIT_13s0074g00730		-2.3959	PID (PINOID)	PINOID	vv50004Auxin_transport	vv50125Porters_cat_66_to_94
VIT_05s0062g01120		1.08381	PIN1	PIN1	vv50004Auxin_transport	vv50125Porters_cat_66_to_94
VIT_14s0108g00020		-2.41603	PIN8 (PIN-formed 8); auxin:hydrogen symporter/ transporter	PIN8	vv50004Auxin_transport	vv50125Porters_cat_66_to_94
VIT_04s0043g00370		-1.68619	Ammonium transporter 1;2	AMT1_2	vv50101Channels_and_pores
VIT_07s0031g02950		-1.65341	Ammonium transporter 2	AMT2	vv50101Channels_and_pores
VIT_09s0002g04020		-1.13359	Aquaporin DELTA-TIP	TIP_DELTA	vv50101Channels_and_pores
VIT_08s0007g04780		1.82774	Aquaporin GAMMA-TIP	TIP_GAMMA	vv50101Channels_and_pores
VIT_18s0001g06480		-1.67567	Aquaporin PIP PIP1;4	PIP1_4	vv50101Channels_and_pores
VIT_13s0019g00330		1.98823	Aquaporin TIP1;3	TIP1_3	vv50101Channels_and_pores
VIT_13s0067g00220		-1.01589	Aquaporin TMP-C	TMPC	vv50101Channels_and_pores
VIT_03s0038g04210		1.08485	Phototropin-2	K08282	vv50101Channels_and_pores
VIT_02s0025g03300		1.12551	Potassium channel tetramerisation domain-containing protein	KCTREL	vv50101Channels_and_pores
VIT_03s0038g00470		-2.31349	Subtilase family protein	SBT3_3	vv50101Channels_and_pores
VIT_16s0098g01160		1.50694	Subtilisin protease	SBT3_5	vv50101Channels_and_pores
VIT_04s0044g01970		-1.05545	Subtilisin protease precursor	SBT3_5	vv50101Channels_and_pores
VIT_01s0011g02840		-2.33825	Cytochrome B561	K08360	vv50105Transport_electron_carriers
VIT_16s0050g00990		-1.13342	ferric reduction oxidase 4	FRO4	vv50105Transport_electron_carriers
VIT_12s0035g02150		-1.4074	ferric reduction oxidase 7 FRO7	FRO7	vv50105Transport_electron_carriers
VIT_14s0171g00210		-1.13544	Ankyrin	K10380	vv50108Accessory_factors_involved_in_transport
VIT_06s0009g02280		-3.26379	Ankyrin repeat	K10380	vv50108Accessory_factors_involved_in_transport
VIT_11s0118g00230		1.01207	ATSYTE/NTMC2T2.1/NTMC2TYPE2.1/SYTE	NTMC2T2_1	vv50109Incompletely_characterized_transport_systems
VIT_19s0138g00140		1.11389	ATSYTE/NTMC2T6.1/NTMC2TYPE6.1/SYTE	NTMC2T6_1	vv50109Incompletely_characterized_transport_systems
VIT_07s0151g00700		1.93197	EDA4 (embryo sac development arrest 4)	EDA4	vv50109Incompletely_characterized_transport_systems
VIT_03s0038g03570		2.21474	Monocopper oxidase SKS5 (SKU5 Similar 5)	SKS5	vv50109Incompletely_characterized_transport_systems
VIT_02s0154g00080		-1.28349	Multi-copper oxidase (SKU5)	SKU5	vv50109Incompletely_characterized_transport_systems
VIT_00s0199g00070		-1.09698	Pleckstriny (PH) domain-containing protein	RHOGAP	vv50109Incompletely_characterized_transport_systems
VIT_00s0407g00010		-1.19251	Pleckstriny (PH) domain-containing protein	RHOGAP	vv50109Incompletely_characterized_transport_systems
VIT_08s0040g02660		6.7964	RARE-cold-inducible 2A	RCI2A	vv50109Incompletely_characterized_transport_systems
VIT_06s0004g04590		1.2224	Epsin N-terminal homology (ENTH) domain-containing	ENTH	vv50110Protein_coat
VIT_18s0001g12120		-1.05055	VvbZIP46	VvbZIP46	vv50110Protein_coat	vv60012BZIP
VIT_07s0005g02500		1.32883	SNF7 family protein	SNF7_1	vv50111Tethering_factors
VIT_16s0013g01950		1.33565	Hexose transporter [Vitis vinifera]	VVHT4	vv50121Porters_cat_1_to_6
VIT_11s0016g03920		6.07886	Polyol transporter 5	PLT5	vv50121Porters_cat_1_to_6
VIT_00s0181g00010		1.19188	Sugar transporter 1	STP1	vv50121Porters_cat_1_to_6
VIT_19s0085g00740		-1.46533	ZIP family transporter	ZIP1	vv50121Porters_cat_1_to_6
VIT_01s0011g00590		-1.01514	Acclimation of photosynthesis to environment	APE2	vv50122Porters_cat_7_to_17
VIT_04s0044g00360		-1.89487	MTN21	MTN21	vv50122Porters_cat_7_to_17
VIT_04s0044g00420		-1.98394	MTN21	MTN21	vv50122Porters_cat_7_to_17
VIT_06s0004g03520		-2.6181	Nitrate excretion transporter1	NAXT1	vv50122Porters_cat_7_to_17
VIT_02s0087g00580		1.32465	Nitrate transporter	NTP3	vv50122Porters_cat_7_to_17
VIT_08s0040g00800		-1.6576	Nodulin MtN21	MTN21	vv50122Porters_cat_7_to_17
VIT_18s0001g13360		-1.79788	Nodulin MtN21 family	MTN21	vv50122Porters_cat_7_to_17
VIT_04s0044g00380		-2.38196	Nodulin MtN21 family	MTN21	vv50122Porters_cat_7_to_17
VIT_18s0041g00630		-1.56104	Proton-dependent oligopeptide transport (POT) family protein	POT	vv50122Porters_cat_7_to_17
VIT_18s0041g00600		-2.19767	Proton-dependent oligopeptide transport (POT) family protein	POT	vv50122Porters_cat_7_to_17
VIT_01s0150g00170		1.23371	SEC14 cytosolic factor	SEC14	vv50122Porters_cat_7_to_17
VIT_01s0137g00480		-1.80626	SEC14 cytosolic factor	SEC14	vv50122Porters_cat_7_to_17
VIT_01s0137g00470		-2.47822	SEC14 cytosolic factor	SEC14	vv50122Porters_cat_7_to_17
VIT_00s0407g00020		1.01607	2-oxoglutarate/malate carrier protein, Mitochondrial	OXMACP	vv50123Porters_cat_18_to_29
VIT_14s0108g00630		1.96742	Amino acid permease	AAPREL	vv50123Porters_cat_18_to_29
VIT_13s0019g04660		1.43536	Amino acid permease	AAPREL	vv50123Porters_cat_18_to_29
VIT_13s0067g02220		1.30106	Amino acid permease	AAPREL	vv50123Porters_cat_18_to_29
VIT_19s0027g01890		-1.30787	Amino acid permease	AAPREL	vv50123Porters_cat_18_to_29
VIT_11s0016g02470		1.11383	Carrier protein, Mitochondrial	K03454	vv50123Porters_cat_18_to_29
VIT_08s0007g07270		-1.3052	Dicarboxylate/tricarboxylate carrier (DTC)	DTC	vv50123Porters_cat_18_to_29
VIT_13s0074g00570		2.34021	Gamma-aminobutyric acid transporter	GAT1	vv50123Porters_cat_18_to_29
VIT_06s0061g01210		1.79911	Lysine histidine transporter 1	LHT1	vv50123Porters_cat_18_to_29
VIT_14s0171g00400		1.19858	Lysine histidine transporter 1	LHT1	vv50123Porters_cat_18_to_29
VIT_01s0010g02630		-1.15685	Lysine histidine transporter 2	LHT2	vv50123Porters_cat_18_to_29
VIT_11s0016g05110		-1.20313	Sodium hypersensitive 1	SHS1	vv50123Porters_cat_18_to_29
VIT_12s0028g02560		-1.30499	Sodium/calcium exchanger family protein	NACAEX	vv50123Porters_cat_18_to_29
VIT_02s0025g03310		1.27529	Arsenite transport protein (ArsB)	ARSB	vv50124Porters_cat_30_to_64
VIT_07s0130g00400		1.34308	Chloride channel protein (CLC-c)	K05393_CLCC	vv50124Porters_cat_30_to_64
VIT_11s0118g00220		1.32789	Chloride channel protein CLC	K05393_CLC	vv50124Porters_cat_30_to_64
VIT_12s0055g00940		-1.47942	Sulfate transporter 1.2	SULTR1_2	vv50124Porters_cat_30_to_64
VIT_07s0031g00940		-3.01898	Sulfate transporter 2.1 (AST68)	AST68	vv50124Porters_cat_30_to_64
VIT_13s0019g04220		-1.55552	Tryptophan/tyrosine permease family	TRYTYRPERM	vv50124Porters_cat_30_to_64
VIT_02s0025g00700		1.42846	Aluminum-activated malate transporter 9	ALMT9	vv50125Porters_cat_66_to_94
VIT_00s0225g00050		1.30826	MATE efflux family protein	MATE	vv50125Porters_cat_66_to_94
VIT_00s0225g00060		1.10429	MATE efflux family protein	MATE	vv50125Porters_cat_66_to_94
VIT_12s0059g02180		-1.03455	MATE efflux family protein	MATE	vv50125Porters_cat_66_to_94
VIT_11s0052g01550		-1.18425	MATE efflux family protein	MATE	vv50125Porters_cat_66_to_94
VIT_17s0000g09270		-1.32655	MATE efflux family protein	MATE	vv50125Porters_cat_66_to_94
VIT_12s0059g02220		-1.55692	MATE efflux family protein	MATE	vv50125Porters_cat_66_to_94
VIT_14s0006g02260		-1.81032	MATE efflux family protein	MATE	vv50125Porters_cat_66_to_94
VIT_07s0031g00750		-2.39995	MATE efflux family protein	MATE	vv50125Porters_cat_66_to_94
VIT_17s0053g00070		-1.6593	Metal-nicotianamine transporter YSL5	YSL5	vv50125Porters_cat_66_to_94
VIT_01s0011g02260		-1.20036	Metal-nicotianamine transporter YSL7	YSL7	vv50125Porters_cat_66_to_94
VIT_01s0182g00130		-1.92846	PHO1-like protein	PHO1	vv50125Porters_cat_66_to_94
VIT_15s0048g01090		-1.29173	SPX (SYG1/Pho81/XPR1) domain-containing protein	SPX	vv50125Porters_cat_66_to_94
VIT_12s0028g01150		1.06409	Transparent testa 12 protein	TT12	vv50125Porters_cat_66_to_94
VIT_01s0011g02480		1.01353	Phospholipid-transporting ATPase	K01530	vv50131Primary_active_transporter_cat_A2_to_A4
VIT_09s0018g00620		1.00013	Co-chaperone-curved DNA binding protein A	K05516	vv50132Primary_active_transporter_cat_A5_to_A8
VIT_04s0023g03470		1.35004	DNAJ heat shock N-terminal domain-containing protein	DNAJREL	vv50132Primary_active_transporter_cat_A5_to_A8
VIT_10s0042g00960		-1.08938	DNAJ heat shock N-terminal domain-containing protein	DNAJREL	vv50132Primary_active_transporter_cat_A5_to_A8
VIT_00s0214g00010		-1.6673	DnaJ homolog, subfamily C, member 13	K09533	vv50132Primary_active_transporter_cat_A5_to_A8
VIT_18s0001g14440		1.15623	Molecular chaperone DnaJ	K03686	vv50132Primary_active_transporter_cat_A5_to_A8
VIT_19s0015g01370		1.07634	Molecular chaperone DnaJ	K03686	vv50132Primary_active_transporter_cat_A5_to_A8
VIT_11s0118g00490		1.18859	Octicosapeptide/Phox/Bem1p (PB1) domain-containing protein	BEM1P	vv50132Primary_active_transporter_cat_A5_to_A8
VIT_06s0004g00620		-1.33266	Accelerated cell death 1 ACD1	ACD1	vv50133Primary_active_transporter_cat_A9_to_A18
VIT_15s0024g01420		-2.34104	DEAD (Asp-Glu-Ala-Asp) box polypeptide 18	DDX18	vv50133Primary_active_transporter_cat_A9_to_A18
VIT_13s0019g04600		1.12695	ABC protein 12 non-intrinsic	ABCNAP12	vv52010ABC_transporters
VIT_14s0066g02320		-2.55253	ABC transporter B member 11	K05664	vv52010ABC_transporters
VIT_01s0010g02440		4.70484	ABC transporter C member 9	K05033	vv52010ABC_transporters
VIT_09s0002g03590		-1.41493	ABC transporter G member 21	ABCG21	vv52010ABC_transporters
VIT_06s0061g01470		1.02717	ABC transporter G member 22	ABCG22	vv52010ABC_transporters
VIT_08s0007g03710		-1.38209	ABC transporter G member 22	ABCG22	vv52010ABC_transporters
VIT_08s0040g02840		1.88029	ABC transporter G member 29	ABCG29	vv52010ABC_transporters
VIT_03s0017g01280		1.18096	ABC transporter G member 7	ABCG7	vv52010ABC_transporters
VIT_02s0025g00990		-1.92153	Multidrug resistance-associated protein 14	MRP14	vv52010ABC_transporters
VIT_13s0067g03750		1.39713	Stigma/style ABC transporter WBC19	WBC19	vv52010ABC_transporters
VIT_02s0025g03000		2.12741	NGA1 (NGATHA1)	RAV3	vv60001ABI3VP1
VIT_06s0004g07790		2.8043	Lateral organ boundaries Domain 15	LBD15_1	vv60007AS2
VIT_13s0067g01450		-1.34482	Lateral organ boundaries domain 21	LBD21	vv60007AS2
VIT_06s0004g03330		1.54666	Lateral organ boundaries protein 11	LBD11_1	vv60007AS2
VIT_01s0011g03540		1.5254	Lateral organ boundaries protein 41	LBD41_3	vv60007AS2
VIT_13s0067g02280		1.56542	Basic helix-loop-helix (bHLH) family	BHLHDOM_6	vv60011BHLH
VIT_14s0060g01010		1.18289	Basic helix-loop-helix (bHLH) family	BHLHDOM_14	vv60011BHLH
VIT_12s0028g02350		1.027	Basic helix-loop-helix (bHLH) family	BHLHDOM_1	vv60011BHLH
VIT_14s0081g00720		-1.03215	Basic helix-loop-helix (bHLH) family	BHLHDOM_9	vv60011BHLH
VIT_13s0067g01350		-1.11885	Basic helix-loop-helix (bHLH) family	BHLHDOM_16	vv60011BHLH
VIT_14s0128g00110		-1.27536	Basic helix-loop-helix (bHLH) family	BHLH096_3	vv60011BHLH
VIT_14s0006g02850		2.07155	BEE1 (BR Enhanced expression 1)	BEE1_2	vv60011BHLH
VIT_04s0008g05210		-2.56593	VvbZIP10, HY5	VvbZIP10, HY5	vv60012BZIP
VIT_19s0014g01780		3.45391	VvbZIP52	VvbZIP52	vv60012BZIP
VIT_05s0077g01140		1.62487	VvbZIP14	VvbZIP14	vv60012BZIP
VIT_00s0541g00020		1.55156	VvbZIP55	VvbZIP55	vv60012BZIP
VIT_02s0025g01020		1.15325	VvbZIP03	VvbZIP03	vv60012BZIP
VIT_00s0652g00010		1.08075	Dof zinc finger protein DOF1.4	DOF1_4_1	vv60015C2C2-DOF
VIT_07s0255g00020		-1.35995	OBF binding protein 1	OBP1_3	vv60015C2C2-DOF
VIT_04s0008g03270		-2.67311	GATA transcription factor 11	GAT11_1	vv60016C2C2-GATA
VIT_04s0023g02880		1.08766	GATA transcription factor 14	GAT14	vv60016C2C2-GATA
VIT_18s0001g09230		1.93163	Salt tolerance zinc finger	STZ_2	vv60017C2H2
VIT_18s0001g02000		-1.06392	Zinc finger (C2H2 type) family	C2H2FAM_9	vv60017C2H2
VIT_18s0001g14130		-2.2222	Zinc finger (C2H2 type) family	C2H2FAM_7	vv60017C2H2
VIT_03s0091g00260		1.50979	Zinc finger protein 4	ZFP4_1	vv60017C2H2
VIT_01s0011g03780		1.14123	Zinc finger protein 6	ZFP6_2	vv60017C2H2
VIT_02s0154g00070		-1.00144	Abnormal floral organs	AFO_1	vv60019C2C2-YABBY
VIT_11s0118g00700		-1.13284	Protein phosphatase 2C DBP	DBPPP2C_1	vv60024DBP
VIT_06s0004g00150		1.40795	MYR1 (MYB-related protein 1)	MYR1_4	vv60029G2-like
VIT_14s0081g00200		-1.23911	AN3 (ANGUSITFOLIA3)	AN3_1	vv60031GIF
VIT_07s0129g00030		-1.43256	Short-root transcription factor (SHR)	SGR7_4	vv60032GRAS
VIT_00s0494g00010		-2.26917	Growth-regulating factor 1	GRF1_1	vv60033GRF
VIT_16s0039g01450		-1.40047	Growth-regulating factor 5	GRF5_2	vv60033GRF
VIT_15s0021g01880		-1.01054	Arabidopsis thaliana homeobox protein 2	VVHB2_3	vv60034HB
VIT_10s0042g00210		-1.06175	Homeobox protein 23	VVHB23	vv60034HB
VIT_08s0007g06670		-1.10443	Homeobox-leucine zipper protein 14	HAT14_1	vv60034HB
VIT_10s0003g00560		-1.69849	Wuschel homeobox 9	WOX9	vv60034HB
VIT_18s0001g09040		-1.46068	LIM domain protein WLIM1	WLIM1_2	vv60040LIM
VIT_14s0030g00350		1.4627	RKF3 (receptor-like kinase IN in flowers 3)	RKF3	vv60042MADS
VIT_02s0033g00390		5.24192	Myb domain protein A2	VvMYBA2	vv60044MYB
VIT_05s0049g01020		1.88296	Myb domain protein 15	VvMYB15	vv60044MYB
VIT_14s0219g00050		-1.41197	Myb domain protein 40	VvMYB40	vv60044MYB
VIT_09s0002g01400		1.12	Myb domain protein PA5	VvMYBPA5	vv60044MYB
VIT_18s0001g11170		-1.2865	Myb domain protein 175	VvMYB175	vv60044MYB
VIT_07s0005g01950		3.60601	Myb domain protein 108B	VvMYB108B	vv60044MYB
VIT_16s0039g01710		1.71578	Myb domain protein 181	VvMYB181	vv60044MYB
VIT_08s0007g00410		-1.23725	Myb domain protein 91A	VvMYB91A	vv60044MYB
VIT_10s0116g00500		-1.25172	Myb caprice CPC	CAPRICE_1	vv60045MYBrelated
VIT_13s0106g00370		1.04501	Myb family	MYBREL_20	vv60045MYBrelated
VIT_04s0023g01910		-2.11281	Myb family	MYBREL_12	vv60045MYBrelated
VIT_04s0044g01500		1.00214	NAC domain containing protein 47	VvNAC47	vv60046NAC
VIT_08s0007g07670		1.82759	NAC domain containing protein 60	VvNAC60	vv60046NAC
VIT_19s0027g00230		2.09288	NAC domain-containing protein 33	VvNAC33	vv60046NAC
VIT_12s0059g00540		-1.03194	EDM2	PHDEDM2_2	vv60048PHD
VIT_03s0063g02240		-1.5606	PLATZ transcription factor	PLATZFAM_10	vv60049PLATZ
VIT_12s0028g03350		-1.68259	Squamosa promoter-binding protein 4 (SPL4)	SPL4_2	vv60055SBP
VIT_17s0000g10420		-1.20939	DNA-binding protein GT-1-related	GT1REL_3	vv60062Trihelix
VIT_04s0008g01850		-1.37892	Trihelix DNA-binding protein (GT2)	GT2_2	vv60062Trihelix
VIT_12s0059g00880		1.26714	VvWRKY37	VvWRKY37	vv60066WRKY
VIT_12s0028g01700		-1.43547	WRKY DNA-binding protein 65	WRKY65_3	vv60066WRKY
VIT_17s0000g01280		1.37345	VvWRKY52	VvWRKY52	vv60066WRKY
VIT_01s0010g03930		1.09694	VvWRKY03	VvWRKY03	vv60066WRKY
VIT_18s0117g00270		4.9464	Zinc finger homeobox 22	ZFHB22_1	vv60068Zf-HD
VIT_12s0035g00900		-2.4155	Jasmonate ZIM domain-containing protein 12	JAZ12_1	vv60069ZIM
VIT_05s0049g01830		-1.05317	CCT motif constans-like	CCT_1	vv60070Orphans_CCT
VIT_09s0054g00530		1.22927	Zinc finger (B-box type)	ZFBBOX_13	vv60073Orphans_zf-b_box
VIT_07s0005g01360		2.24242	Zinc finger (C3HC4-type ring finger)	ZFC3HC4_185	vv60078Other_zf-C3HC4
VIT_01s0011g02950		1.54471	Zinc finger (C3HC4-type ring finger)	ZFC3HC4_126	vv60078Other_zf-C3HC4
VIT_05s0020g04730		1.36149	Zinc finger (C3HC4-type ring finger)	ZFC3HC4_90	vv60078Other_zf-C3HC4
VIT_01s0026g01030		1.26104	Zinc finger (C3HC4-type ring finger)	ZFC3HC4_141	vv60078Other_zf-C3HC4
VIT_02s0025g03030		-1.08492	Zinc finger (C3HC4-type ring finger)	ZFC3HC4_23	vv60078Other_zf-C3HC4
VIT_13s0019g04440		-1.1039	Zinc finger (C3HC4-type ring finger)	ZFC3HC4_163	vv60078Other_zf-C3HC4
VIT_06s0004g05850		-1.20971	Zinc finger (C3HC4-type ring finger)	ZFC3HC4_34	vv60078Other_zf-C3HC4
VIT_06s0004g08080		-1.37217	Zinc finger (C3HC4-type ring finger)	ZFC3HC4_139	vv60078Other_zf-C3HC4
VIT_01s0011g04080		-2.11627	Zinc finger (C3HC4-type ring finger)	ZFC3HC4_178	vv60078Other_zf-C3HC4
VIT_02s0025g01430		1.43868	Zinc finger (C3HC4-type ring finger) family protein ATL1E	ATL1E_1	vv60078Other_zf-C3HC4
VIT_05s0020g03680		1.932	GCN5 N-acetyltransferase (GNAT)	GCN5_7	vv60082GNAT
VIT_11s0016g02480		1.13853	2,3-diketo-5-methylthio-1-phosphopentane phosphatase
VIT_08s0040g00710		-1.20454	3'-5' exonuclease domain-containing protein	K01146
VIT_02s0025g02020		-2.06709	Abl interactor 3 (ABIL3)
VIT_12s0059g01080		1.12376	Acid phosphatase/vanadium-dependent haloperoxidase
VIT_18s0001g15000		-1.09955	ACT domain containing protein (ACR4)
VIT_06s0004g07880		-1.95667	Allergen
VIT_05s0094g01250		-1.42099	Allyl alcohol dehydrogenase
VIT_13s0019g05100		-1.25742	Amino acid binding protein
VIT_13s0106g00230		-1.10845	Ankyrin	K10380
VIT_19s0014g04160		1.31125	ARK3 (Arabidopsis Receptor Kinase 3)
VIT_12s0059g01340		1.02362	Armadillo/beta-catenin repeat
VIT_00s0524g00030		1.48678	Armadillo/beta-catenin repeat protein / U-box domain-containing protein
VIT_00s0524g00010		1.06904	Armadillo/beta-catenin repeat protein / U-box domain-containing protein
VIT_10s0071g00770		1.62182	Aspartic proteinase nepenthesin-1 precursor	E3_4_23_12
VIT_06s0061g01030		1.16099	Aspartic proteinase nepenthesin-2 precursor	E3_4_23_12
VIT_19s0085g01110		3.0646	Aspartyl protease	E3_4_23_x
VIT_00s0259g00110		1.91312	ATFP3 (Arabidopsis thaliana farnesylated protein 3	VVFP3
VIT_17s0000g01110		-1.69623	ATFP3 (Arabidopsis thaliana farnesylated protein 3	VVFP3
VIT_15s0045g00250		-1.0463	Auxilin
VIT_13s0064g01510		1.27733	Auxin-independent growth promoter
VIT_13s0067g01460		1.38069	Avr9/Cf-9 rapidly elicited protein
VIT_01s0137g00170		-1.09021	B-keto acyl reductase
VIT_02s0025g02620		2.39184	BDG1 (BODYGUARD1) hydrolase
VIT_01s0011g05180		3.39848	Bet v I allergen
VIT_07s0005g00390		1.05857	Beta Glucosidase 11	BGLU11
VIT_05s0077g01150		3.24215	Beta-1,3-glucanase	E3_2_1_6
VIT_08s0007g06040		3.05368	Beta-1,3-glucanase	E3_2_1_6
VIT_10s0003g03690		3.56323	Beta-1,3-glucanase precursor	E3_2_1_6
VIT_12s0035g00990		-1.0093	Big apical meristem 1 BAM1
VIT_10s0071g00850		1.35303	Binding
VIT_10s0071g00810		1.34095	Binding
VIT_11s0016g01460		-2.72427	BRXL4 (Brevis radix like 4)
VIT_04s0008g00950		1.248	Calcineurin B protein 10	E3_1_3_16
VIT_06s0004g01050		1.44779	Calcineurin phosphoesterase
VIT_17s0000g05880		1.15932	Calcineurin phosphoesterase
VIT_17s0000g09480		1.14327	Calcineurin phosphoesterase
VIT_05s0049g02080		-1.01014	Calcium ion binding protein
VIT_13s0019g01830		-1.04532	Calmodulin binding protein
VIT_13s0074g00760		-2.06153	Calmodulin-binding
VIT_03s0063g00800		-1.07977	Carboxyesterase 12; CXE12	E3_1_1_1
VIT_03s0063g00790		-1.27642	Carboxyesterase 13; CXE13	E3_1_1_1
VIT_18s0089g00370		-2.23458	Carboxyesterase18 CXE18	E3_1_1_1
VIT_13s0320g00060		-1.18995	Carboxyl-terminal peptidase
VIT_17s0000g08870		-1.67832	Carboxyl-terminal proteinase
VIT_10s0003g00960		-2.00586	Carboxylic ester hydrolase	E3_1_1_1
VIT_13s0106g00440		-2.22602	Carboxylic ester hydrolase	E3_1_1_1
VIT_10s0003g01410		4.21462	CBL-interacting protein kinase 20 (CIPK20)	CIPK20
VIT_04s0008g05770		1.22466	CBL-interacting protein kinase 25 (CIPK25)
VIT_09s0070g00160		1.59231	CBL-interacting protein kinase 6 (CIPK6)	CIPK6
VIT_11s0016g00200		1.19266	CBL-interacting protein kinase 6 (CIPK6)	CIPK6
VIT_09s0002g06980		-1.1483	Chloroplast post-illumination chlorophyll fluorescence increase protein
VIT_15s0046g00870		-1.17945	Cleavage and polyadenylation specificity factor (CPSF) A subunit
VIT_16s0013g01990		-1.61587	CLL1B clavata1-like receptor S/T protein kinase
VIT_02s0025g03010		-1.04696	Copper chaperone (CCH)
VIT_16s0098g00800		1.47369	Copper-binding family protein
VIT_05s0020g02690		-1.38348	Copper-binding family protein
VIT_00s0532g00070		1.58618	CRK10 (cysteine-rich RLK10); kinase
VIT_04s0008g05280		-1.01089	CRR2 (chlororespiratory reduction 2)
VIT_01s0011g05310		-1.53203	CRR3 (chlororespiratory reduction 3)
VIT_14s0128g00300		-1.10783	Ctp
VIT_09s0002g07130		-1.13376	CUE domain containing protein
VIT_12s0034g01870		2.374	Cupin
VIT_08s0056g01300		-1.3374	Cupin, RmlC-type
VIT_19s0014g01370		2.61807	Curculin (mannose-binding) lectin
VIT_19s0014g01360		1.54452	Curculin (mannose-binding) lectin
VIT_16s0050g01960		-1.04018	Curculin (mannose-binding) lectin
VIT_02s0033g01210		-1.03779	Cyclops
VIT_18s0001g12210		1.13184	CYP721A1
VIT_18s0001g12190		-1.29794	CYP721A1
VIT_18s0001g12180		-1.39075	CYP721A1
VIT_02s0025g04890		1.4053	CYP76B1
VIT_10s0116g00800		-1.11475	CYP77A3
VIT_01s0010g03560		-3.97374	CYP78A5
VIT_06s0004g06210		2.12419	CYP86A1
VIT_18s0122g01470		-2.0681	CYP87A2
VIT_18s0001g00030		-3.87799	CYP87A2
VIT_14s0068g02120		1.19478	CYP94B3
VIT_02s0033g01120		1.73563	Dehydration-responsive protein
VIT_04s0008g04000		-1.33406	Dehydration-responsive protein (RD22)	RD22
VIT_03s0038g04390		5.5557	Dehydrin 1
VIT_15s0046g01680		-1.01438	Delta-8 sphingolipid desaturase
VIT_19s0027g01630		1.75204	Disease resistance protein (NBS-LRR class)
VIT_00s0160g00310		-1.21169	Disease resistance protein (TIR-NBS-LRR class
VIT_14s0036g01310		-1.21082	Disease resistance protein RPS2
VIT_08s0007g06950		-1.11494	Disease resistance-responsive
VIT_08s0007g06960		-1.15493	Disease resistance-responsive
VIT_04s0044g01300		1.32609	DNA cross-link repair protein
VIT_05s0049g02090		-1.0261	DNA mismatch repair protein
VIT_13s0064g01260		2.27368	DNA-damage-repair/toleration protein (DRT100)
VIT_02s0025g03710		1.54591	DTA2 (downstream target of AGL15 2)
VIT_02s0025g03720		1.34859	DTA2 (downstream target of AGL15 2)
VIT_01s0010g00340		-1.33711	EDA18 (embryo sac development arrest 18)
VIT_18s0089g00260		-1.04158	EMB2758 (embryo defective 2758)
VIT_07s0104g00430		-1.61499	Endo-1,3;1,4-beta-D-glucanase precursor	E3_2_1_73
VIT_04s0008g01970		-1.16303	ER (ERECTA)
VIT_00s0181g00080		1.22073	F-box domain containing protein
VIT_06s0009g03670		1.84754	F-box family protein
VIT_14s0171g00340		1.04808	F-box family protein
VIT_08s0040g02600		1.00175	F-box protein
VIT_08s0058g00700		1.05726	F-box protein (FBL3)
VIT_00s0214g00090		1.03068	F-box protein PP2-B10 (Protein phloem protein 2-like B10)
VIT_01s0011g01780		1.79842	F-box protein PP2-B12 (Protein phloem protein 2-like B12)
VIT_12s0028g01790		-1.28948	FAD-linked oxidoreductase 1
VIT_14s0068g00120		1.13849	feronia receptor-like kinase
VIT_15s0048g00200		-2.02807	Gag-pol polyprotein
VIT_05s0077g02050		-1.36453	Gamete expressed2 (GEX2)
VIT_01s0010g01840		1.10281	GEM-like protein 5
VIT_07s0151g00640		-2.97901	Globulin-1 S allele precursor
VIT_12s0034g01900		2.97182	Globulin-like protein
VIT_07s0104g01420		2.30163	Glutaredoxin
VIT_08s0007g05530		-1.00985	Glutaredoxin
VIT_08s0032g01030		-1.14583	Glutaredoxin
VIT_08s0007g01850		-1.27944	Glycine-rich protein
VIT_06s0004g05660		1.29805	Glycosyl transferase family 1 protein
VIT_07s0005g01040		1.55792	Glycosyl transferase family 8 protein
VIT_08s0007g08840		1.33172	Glycosyl transferaseHGA1
VIT_01s0011g04680		1.48778	Glycosyltransferase family 14
VIT_18s0001g11900		1.05624	GNS1/SUR4 membrane
VIT_06s0004g01140		1.66639	GRIK1 (geminivirus rep interacting kinase 1)
VIT_08s0007g00320		-1.34023	GTP binding protein
VIT_05s0020g04850		-1.0122	H1flk
VIT_12s0055g00370		-1.15361	Harpin-induced protein
VIT_05s0020g01450		-1.94014	Heavy-metal-associated domain-containing protein
VIT_00s0753g00020		-1.53425	Histone H2A.4 HTA12	H2A4
VIT_17s0000g08240		1.03304	HT1 (high leaf temperature 1)
VIT_13s0067g00700		1.7208	Hydrolase, alpha/beta fold
VIT_09s0002g01170		-1.77767	Hydrolase, alpha/beta fold family protein
VIT_14s0068g02150		2.04084	Kelch repeat-containing F-box family protein
VIT_06s0009g02110		-1.90877	Kelch repeat-containing F-box family protein
VIT_16s0013g01940		-1.10562	Kinase-like protein TMKL1
VIT_11s0016g03250		-1.31441	Lachrymatory factor synthase
VIT_01s0026g00810		1.53944	Leaf senescence protein
VIT_15s0046g01230		-1.41027	Leaf senescence protein-like
VIT_14s0108g00340		1.78814	Leucine Rich Repeat receptor-like kinase
VIT_11s0037g00680		-2.08376	Leucine Rich Repeat receptor-like kinase
VIT_02s0012g01010		-1.29646	Leucine-rich repeat
VIT_05s0020g03030		1.01715	Leucine-rich repeat family protein
VIT_07s0031g00120		-1.24658	Leucine-rich repeat transmembrane protein kinase
VIT_18s0001g14790		1.16492	Lipase 3 (EXL3) family II extracellular
VIT_05s0077g00480		-1.71262	Lipase class 3
VIT_05s0077g00490		-2.07046	Lipase class 3
VIT_17s0000g04050		1.46416	Lipase family
VIT_18s0001g08510		1.15021	Lipase family
VIT_12s0059g01480		-1.05529	Lipase family
VIT_18s0001g02760		2.46823	Lipase GDSL
VIT_10s0003g00620		2.31976	Lipase GDSL
VIT_07s0255g00030		2.05885	Lipase GDSL
VIT_17s0000g06290		2.00959	Lipase GDSL
VIT_14s0006g01120		1.91429	Lipase GDSL
VIT_12s0059g01590		1.45896	Lipase GDSL
VIT_17s0000g10060		1.15523	Lipase GDSL
VIT_07s0151g00760		3.29318	Lipid transfer protein	LTP
VIT_05s0020g03730		2.06111	Lipid transfer protein	LTP
VIT_02s0012g00990		-1.61259	LOL1 (LSD ONE like 1)	LOL1
VIT_01s0011g04740		-1.06101	LPR1 (Low Phosphate Root1) multicopper oxidase
VIT_05s0077g01650		-2.70102	Major allergen Pru ar 1
VIT_01s0011g05060		-2.2156	Major latex-like protein 34
VIT_01s0011g05090		-3.44482	Major latex-like protein 34
VIT_16s0039g01770		-2.22717	Major pollen allergen Car b 1 isoforms 1A and 1B
VIT_05s0077g01680		-1.64389	Mal d 1 allergen
VIT_17s0000g02570		1.31925	MAPK (MPK8)
VIT_12s0059g00870		3.13643	MAPKKK15
VIT_10s0003g01430		1.64998	MEE62 (maternal effect embryo arrest 62)
VIT_00s0259g00080		2.56051	Metal ion binding
VIT_11s0052g00630		3.14262	Metallothionein
VIT_08s0007g00330		1.32501	Metallothionein
VIT_01s0011g04720		-1.23027	Multi copper oxidase type 1
VIT_14s0030g01790		-1.64386	Ndr family protein
VIT_07s0104g00180		1.38119	Nectarin IV NEC4
VIT_13s0067g00260		1.44726	Nematode-resistance protein
VIT_11s0037g00960		-1.08344	NIK1 (NSP- interacting kinase 1)
VIT_14s0083g00620		-1.30919	NIK1 (NSP- interacting kinase 1)
VIT_10s0003g01490		-1.11929	NIK3 (NSP- interacting kinase 3)
VIT_14s0108g00450		5.41922	No hit
VIT_03s0110g00290		4.715	No hit
VIT_14s0083g00260		3.50856	No hit
VIT_03s0017g00180		3.43017	No hit
VIT_03s0017g00250		3.41117	No hit
VIT_11s0016g00950		3.2449	No hit
VIT_08s0007g08000		2.62362	No hit
VIT_00s0407g00050		2.59131	No hit
VIT_11s0016g02000		2.25931	No hit
VIT_14s0068g00040		1.79296	No hit
VIT_09s0002g04470		1.55197	No hit
VIT_00s0477g00010		1.52485	No hit
VIT_14s0068g00050		1.51945	No hit
VIT_00s0199g00310		1.51269	No hit
VIT_15s0048g00740		1.5017	No hit
VIT_00s2342g00020		1.48184	No hit
VIT_12s0059g01720		1.46255	No hit
VIT_00s0524g00040		1.43827	No hit
VIT_12s0028g03120		1.38103	No hit
VIT_17s0000g09800		1.37157	No hit
VIT_19s0015g00270		1.32169	No hit
VIT_00s0233g00010		1.28729	No hit
VIT_18s0166g00250		1.22327	No hit
VIT_13s0139g00020		1.1648	No hit
VIT_08s0058g00400		1.15865	No hit
VIT_12s0028g03900		1.09573	No hit
VIT_04s0008g00700		1.07923	No hit
VIT_03s0017g01460		1.04836	No hit
VIT_03s0088g00270		1.04808	No hit
VIT_13s0019g01440		1.04488	No hit
VIT_05s0102g00660		1.03089	No hit
VIT_07s0005g02720		1.0242	No hit
VIT_14s0068g01850		1.014	No hit
VIT_14s0030g01230		1.01109	No hit
VIT_16s0098g01000		1.00988	No hit
VIT_01s0010g02650		-1.03118	No hit
VIT_14s0068g00150		-1.03576	No hit
VIT_14s0036g00340		-1.03998	No hit
VIT_19s0085g00320		-1.04255	No hit
VIT_14s0006g01320		-1.04734	No hit
VIT_12s0028g03790		-1.0695	No hit
VIT_07s0005g02080		-1.07684	No hit
VIT_10s0003g04820		-1.08005	No hit
VIT_06s0004g05290		-1.09986	No hit
VIT_18s0117g00040		-1.11596	No hit
VIT_18s0075g00500		-1.13846	No hit
VIT_18s0117g00030		-1.16497	No hit
VIT_00s1428g00020		-1.16604	No hit
VIT_01s0026g02740		-1.17764	No hit
VIT_10s0116g01300		-1.19683	No hit
VIT_09s0070g00720		-1.2021	No hit
VIT_14s0036g01160		-1.24258	No hit
VIT_18s0001g01470		-1.29853	No hit
VIT_14s0030g01040		-1.34347	No hit
VIT_18s0001g12110		-1.36782	No hit
VIT_18s0001g12920		-1.42213	No hit
VIT_13s0067g03630		-1.4411	No hit
VIT_01s0011g01860		-1.48034	No hit
VIT_06s0080g00660		-1.49484	No hit
VIT_10s0003g01120		-1.53837	No hit
VIT_17s0000g01060		-2.00028	No hit
VIT_06s0004g04210		-2.16001	No hit
VIT_06s0004g07330		-2.66303	No hit
VIT_03s0017g01880		-3.75474	No hit
VIT_17s0000g00830		1.00537	Nodulin MtN3 family
VIT_16s0050g02540		-2.12305	Nodulin MtN3 family
VIT_14s0006g02530		1.93192	Non-specific lipid-transfer protein 2 (LTP 2)
VIT_03s0091g00680		-1.33426	NPY2 (naked pins in yuc mutants 2)
VIT_01s0011g05950		1.90232	NSL1 (necrotic spotted lesions 1)
VIT_08s0058g00170		-1.14185	Nudix hydrolase 15, mitochondrial precursor (AtNUDT15)
VIT_17s0000g02050		1.47835	Nudix hydrolase 17
VIT_05s0051g00660		1.21469	Octicosapeptide/Phox/Bem1p; Protein kinase
VIT_02s0025g04280		1.48843	Osmotin
VIT_08s0007g04540		-1.11394	Oxidoreductase, 2OG-Fe(II) oxygenase
VIT_09s0002g08090		-1.15062	Oxidoreductase, 2OG-Fe(II) oxygenase
VIT_14s0030g00970		-1.06219	Oxidoreductase, zinc-binding dehydrogenase family
VIT_00s0567g00060		1.65898	Patatin
VIT_08s0007g05800		1.21303	Patatin
VIT_13s0019g04200		1.12321	Patatin
VIT_07s0031g03220		-1.2233	Patellin-1
VIT_08s0058g00640		-1.62641	Patellin-5
VIT_18s0001g15660		1.34883	Pathogen-related
VIT_14s0128g00290		-1.02661	Pentatricopeptide (PPR) repeat-containing
VIT_03s0063g02230		-1.08721	Pentatricopeptide (PPR) repeat-containing protein
VIT_18s0001g03630		-1.10645	Pentatricopeptide (PPR) repeat-containing protein
VIT_14s0060g00200		-1.14553	Pentatricopeptide repeat-containing protein
VIT_09s0002g02450		-1.29965	Phosphatase
VIT_03s0038g03860		-1.09704	Phosphate-induced protein 1
VIT_04s0008g05120		-1.49068	Phospholipase/carboxylesterase	E3_1_1_1
VIT_00s0194g00080		-1.54355	Phototropic-responsive NPH3
VIT_07s0104g01440		-2.57363	Phototropic-responsive NPH3
VIT_09s0002g05700		-3.06535	Phototropic-responsive NPH3
VIT_07s0005g00340		1.52035	Phytochrome A-associated F-box protein
VIT_12s0028g01360		1.81891	PMR5 (powdery mildew resistant 5)
VIT_05s0020g03750		3.62684	Protease inhibitor/seed storage/lipid transfer protein (LTP)
VIT_08s0007g01370		1.83654	Protease inhibitor/seed storage/lipid transfer protein (LTP)
VIT_19s0090g01470		-1.53706	Protease inhibitor/seed storage/lipid transfer protein (LTP)
VIT_01s0150g00480		-1.86153	Protein binding protein
VIT_01s0127g00540		1.12083	Protein disulfide isomerase	E5_3_4_1
VIT_01s0127g00530		1.04971	Protein disulfide isomerase	E5_3_4_1
VIT_01s0127g00560		1.03384	Protein disulfide isomerase	E5_3_4_1
VIT_03s0063g02510		1.46379	Protein kinase
VIT_06s0004g07070		1.20167	Protein kinase
VIT_03s0038g03040		1.00959	Protein kinase
VIT_18s0001g01680		-1.12067	Protein kinase
VIT_03s0038g02400		-1.46954	Protein kinase
VIT_12s0134g00330		-1.46982	Protein kinase
VIT_18s0001g00720		-1.80575	Protein kinase
VIT_06s0004g06840		1.37765	Protein phosphatase 2C	E3_1_3_16
VIT_07s0129g00520		1.26275	Protein phosphatase 2C	E3_1_3_16
VIT_04s0023g00690		1.02638	Protein phosphatase 2C	E3_1_3_16
VIT_08s0040g02970		-1.85755	Protein phosphatase 2C	E3_1_3_16
VIT_02s0087g00750		1.52389	Proteinase inhibitor I4, serpin
VIT_00s2342g00010		1.57295	PUB9 (plant U- box 9)
VIT_13s0019g05190		1.96786	RAB GTPase RAB_ALPHA	K07976
VIT_08s0040g03050		-1.30038	RabGAP/TBC domain-containing protein
VIT_17s0000g08370		1.03013	RCD one 2 (SRO2)
VIT_04s0008g04150		-1.32715	RD22
VIT_04s0008g04050		-1.59896	RD22
VIT_13s0064g00120		-1.85812	Receptor Like Protein 35
VIT_19s0014g03400		1.66911	Receptor protein kinase
VIT_10s0116g00050		-1.07333	Receptor protein kinase
VIT_00s2594g00010		-1.26045	Receptor protein kinase
VIT_02s0025g01040		-1.40953	Receptor protein kinase
VIT_06s0009g01640		-1.60637	Receptor protein kinase
VIT_03s0063g00210		-2.56938	Receptor protein kinase
VIT_16s0039g01180		-1.20159	Receptor serine/threonine kinase
VIT_00s0258g00020		-1.32776	Receptor serine/threonine kinase
VIT_16s0022g01650		-1.6943	Receptor serine/threonine kinase PR5K
VIT_14s0006g02630		1.40028	Receptor-like kinase ARK1AS
VIT_01s0011g05600		1.16715	Receptor-like protein kinase
VIT_12s0134g00260		-2.02917	Receptor-like protein kinase ARK1
VIT_10s0003g04090		1.03538	Remorin
VIT_14s0068g02180		-1.63929	Retrotransposon protein
VIT_08s0007g04180		-1.18818	Retrotransposon protein, Ty1-copia subclass
VIT_12s0028g03930		-1.45588	Retrotransposon protein, Unclassified
VIT_05s0062g00780		-1.15055	Rho GDP-dissociation inhibitor 2
VIT_08s0105g00310		-1.19478	Rhodanese domain-containing protein	K07146
VIT_01s0026g02520		1.18485	Ribonuclease T2	E3_1_27_1
VIT_19s0014g02900		1.43775	Ring finger protein 185
VIT_10s0003g01960		-1.47217	RKF1 (receptor-like kinase in flowers 1)
VIT_04s0008g01220		-2.18421	RKL1 (Receptor-like kinase 1)
VIT_15s0048g02630		-1.03026	RNA binding motif protein 38	RBM38
VIT_14s0068g00970		-1.01233	RPK1 (receptor-like protein kinase 1)
VIT_01s0011g05930		1.02829	S-adenosyl-L-methionine:carboxyl methyltransferase
VIT_12s0134g00390		-2.88239	S-locus lectin protein kinase family
VIT_19s0014g04280		1.67589	S-locus protein kinase
VIT_00s1644g00010		-1.14477	S-locus protein kinase
VIT_05s0020g03300		2.0485	S-receptor kinase
VIT_04s0044g00650		1.86618	S-receptor kinase
VIT_04s0044g00680		1.74075	S-receptor kinase
VIT_06s0004g01410		1.5409	S-receptor kinase
VIT_04s0044g00660		1.246	S-receptor kinase
VIT_12s0028g01650		1.19029	S-receptor kinase
VIT_19s0014g04040		1.10415	S-receptor protein kinase
VIT_13s0019g04610		1.63646	Salt stress-inducible protein kinase
VIT_18s0001g01570		1.16625	Seed maturation protein PM31
VIT_11s0016g00690		-1.12241	Senescence-associated protein
VIT_05s0077g02100		-1.72212	Senescence-associated protein
VIT_02s0012g00280		-2.2263	Senescence-associated protein
VIT_02s0025g04660		1.31273	Senescence-inducible chloroplast stay-green protein 1
VIT_09s0002g09090		-1.50819	Ser/thr specific protein kinase
VIT_17s0000g00370		-2.08021	Serine carboxypeptidase II
VIT_03s0091g01290		1.70437	Serine carboxypeptidase S10
VIT_14s0108g00100		1.42128	Serine carboxypeptidase S10
VIT_01s0011g02030		-1.21958	Serine carboxypeptidase S10
VIT_01s0011g02000		-1.74865	Serine carboxypeptidase S10
VIT_00s0125g00220		1.44927	Serine/theronine protein kinase 2
VIT_00s0125g00210		1.3286	Serine/theronine protein kinase 2
VIT_10s0071g00440		1.37445	Serine/threonine-protein kinase receptor ARK3
VIT_19s0014g04090		1.04312	Serine/threonine-protein kinase receptor ARK3
VIT_14s0068g01210		2.02653	Sex determination protein tasselseed-2
VIT_16s0050g00750		1.04325	Short-chain dehydrogenase/reductase
VIT_12s0028g01390		-1.15347	Small heat shock protein ACD31
VIT_19s0014g00960		1.70222	Spg1p (septum-promoting GTPase)
VIT_12s0059g02280		1.21412	Spg1p (septum-promoting GTPase)
VIT_08s0032g00680		1.18378	SPX (SYG1/Pho81/XPR1) domain-containing protein
VIT_09s0018g01390		1.84587	STE20/SPS1 proline-alanine-rich protein kinase
VIT_09s0018g01370		1.70706	STE20/SPS1 proline-alanine-rich protein kinase
VIT_00s0586g00030		3.40789	Stem-specific protein TSJT1
VIT_00s0561g00020		2.65153	Stem-specific protein TSJT1
VIT_03s0063g01470		-1.0905	Steroid nuclear receptor, ligand-binding
VIT_10s0116g00100		-1.21819	Strubbelig receptor family 8
VIT_12s0034g02390		1.1473	T-complex protein 11
VIT_18s0001g11120		1.01663	Ternary complex factor MIP1
VIT_00s0229g00120		-1.19472	Ternary complex factor MIP1
VIT_02s0025g04300		2.27356	Thaumatin
VIT_02s0025g04310		1.55539	Thaumatin
VIT_02s0025g04320		1.29905	Thaumatin
VIT_04s0023g03540		1.57672	Thaumatin SCUTL1
VIT_08s0007g07620		1.23008	Thioredoxin 2
VIT_19s0014g05090		1.11492	Thioredoxin h
VIT_17s0000g07690		-2.01063	Transducin family protein / WD-40
VIT_08s0056g00610		-1.4974	Transposon protein, Mutator sub-class
VIT_12s0059g01400		1.37548	Tyrosine specific protein phosphatase
VIT_19s0090g00120		1.45214	Ubiquitin-conjugating enzyme E2 variant	K10704
VIT_06s0004g07270		1.07991	UDP-glucoronosyl and UDP-glucosyl transferase
VIT_06s0061g00360		-3.32892	UDP-glucoronosyl and UDP-glucosyl transferase
VIT_08s0007g04610		-1.00835	UGT73C2 (UDP-glucosyl transferase 73C2)
VIT_05s0020g03360		3.02299	Unknown
VIT_13s0064g00910		2.83794	Unknown
VIT_13s0156g00150		2.03696	Unknown
VIT_07s0205g00010		1.85296	Unknown
VIT_19s0177g00230		1.84874	Unknown
VIT_19s0090g00960		1.84403	Unknown
VIT_00s0516g00010		1.72056	Unknown
VIT_08s0007g02370		1.35128	Unknown
VIT_15s0045g01370		1.31463	Unknown
VIT_15s0021g01260		1.3058	Unknown
VIT_09s0002g08840		1.29383	Unknown
VIT_01s0011g04190		1.23554	Unknown
VIT_13s0158g00090		1.21092	Unknown
VIT_11s0118g00650		1.12782	Unknown
VIT_14s0108g01250		1.04952	Unknown
VIT_01s0011g02360		1.01524	Unknown
VIT_13s0067g00540		-1.01228	Unknown
VIT_15s0046g02360		-1.02134	Unknown
VIT_09s0002g08110		-1.05416	Unknown
VIT_01s0011g04750		-1.17408	Unknown
VIT_04s0008g01250		-1.27084	Unknown
VIT_11s0016g02260		-1.3051	Unknown
VIT_00s0229g00100		-1.33687	Unknown
VIT_16s0050g01990		-1.41492	Unknown
VIT_04s0008g03990		-1.41915	Unknown
VIT_02s0025g00860		-1.53312	Unknown
VIT_09s0002g04840		-1.90262	Unknown
VIT_08s0058g00230		-1.96257	Unknown
VIT_01s0010g00720		-2.14787	Unknown
VIT_02s0087g00640		-2.65115	Unknown
VIT_08s0058g01010		-3.41429	Unknown
VIT_18s0001g00140		5.18307	Unknown protein
VIT_18s0001g03860		2.88626	Unknown protein
VIT_18s0001g02100		2.59886	Unknown protein
VIT_00s0265g00090		2.52116	Unknown protein
VIT_05s0077g01980		2.46911	Unknown protein
VIT_12s0035g02080		2.33474	Unknown protein
VIT_08s0056g01500		2.27832	Unknown protein
VIT_02s0012g01590		2.20073	Unknown protein
VIT_00s0386g00040		2.01556	Unknown protein
VIT_04s0008g01380		1.85566	Unknown protein
VIT_11s0016g02980		1.82033	Unknown protein
VIT_08s0007g01360		1.80266	Unknown protein
VIT_17s0000g03200		1.77892	Unknown protein
VIT_12s0028g00040		1.69912	Unknown protein
VIT_11s0118g00770		1.66073	Unknown protein
VIT_04s0044g00970		1.58	Unknown protein
VIT_01s0011g05680		1.57802	Unknown protein
VIT_06s0004g03910		1.55226	Unknown protein
VIT_13s0064g00460		1.47413	Unknown protein
VIT_09s0002g04580		1.42479	Unknown protein
VIT_14s0006g02880		1.40155	Unknown protein
VIT_02s0012g00890		1.38825	Unknown protein
VIT_10s0071g00840		1.27064	Unknown protein
VIT_14s0219g00110		1.26593	Unknown protein
VIT_02s0087g00610		1.21629	Unknown protein
VIT_10s0092g00640		1.17584	Unknown protein
VIT_01s0010g00060		1.16175	Unknown protein
VIT_04s0023g02160		1.14898	Unknown protein
VIT_12s0142g00160		1.14284	Unknown protein
VIT_18s0001g00130		1.13922	Unknown protein
VIT_00s0199g00270		1.13067	Unknown protein
VIT_01s0150g00410		1.12474	Unknown protein
VIT_18s0001g07600		1.11159	Unknown protein
VIT_10s0003g01070		1.1052	Unknown protein
VIT_01s0011g00120		1.10091	Unknown protein
VIT_11s0037g00480		1.03107	Unknown protein
VIT_05s0049g01390		1.02643	Unknown protein
VIT_13s0019g01100		1.01586	Unknown protein
VIT_10s0042g00560		-1.00013	Unknown protein
VIT_00s0333g00060		-1.04014	Unknown protein
VIT_03s0063g00030		-1.06414	Unknown protein
VIT_06s0009g00310		-1.06581	Unknown protein
VIT_01s0137g00740		-1.0784	Unknown protein
VIT_04s0008g03570		-1.10143	Unknown protein
VIT_14s0066g01300		-1.1054	Unknown protein
VIT_18s0122g00330		-1.14863	Unknown protein
VIT_19s0014g00970		-1.15277	Unknown protein
VIT_02s0025g01300		-1.19535	Unknown protein
VIT_08s0007g07920		-1.20028	Unknown protein
VIT_01s0011g04730		-1.20494	Unknown protein
VIT_01s0011g05450		-1.21448	Unknown protein
VIT_06s0004g07090		-1.24354	Unknown protein
VIT_07s0005g03390		-1.24857	Unknown protein
VIT_00s0271g00090		-1.25725	Unknown protein
VIT_15s0021g02270		-1.27335	Unknown protein
VIT_15s0046g01340		-1.30793	Unknown protein
VIT_16s0050g01260		-1.32359	Unknown protein
VIT_02s0025g03940		-1.34874	Unknown protein
VIT_14s0068g01390		-1.35941	Unknown protein
VIT_02s0241g00050		-1.35943	Unknown protein
VIT_09s0002g01520		-1.39876	Unknown protein
VIT_00s0274g00050		-1.42034	Unknown protein
VIT_10s0003g03250		-1.4714	Unknown protein
VIT_08s0040g02650		-1.52422	Unknown protein
VIT_17s0000g04340		-1.53807	Unknown protein
VIT_10s0116g00900		-1.61857	Unknown protein
VIT_17s0000g06750		-1.63339	Unknown protein
VIT_14s0171g00170		-1.66651	Unknown protein
VIT_08s0007g07110		-1.78312	Unknown protein
VIT_17s0000g09400		-1.7987	Unknown protein
VIT_17s0000g09900		-1.92344	Unknown protein
VIT_01s0011g03050		-1.95162	Unknown protein
VIT_14s0060g01420		-1.95727	Unknown protein
VIT_02s0025g00550		-1.99433	Unknown protein
VIT_07s0031g01910		-2.02728	Unknown protein
VIT_18s0122g00290		-2.09753	Unknown protein
VIT_08s0007g08780		-2.39943	Unknown protein
VIT_13s0019g01040		-3.52494	Unknown protein
VIT_05s0020g01830		1.7692	UPF0497 family
VIT_18s0072g00820		-1.56673	VFB3 (VIER F- box proteinE 3)
VIT_04s0044g00880		-1.62107	WD40
VIT_12s0028g00670		4.76948	Zinc knuckle	ZFC2HC
